# Supplementary material for: Nickel-catalyzed coupling of R2P(O)Me (R = aryl or alkoxy) with (hetero)arylmethyl alcohols
Source: Royal Society of Chemistry journal article supplement (doi:10.1039/d1ob00086a), 2021-01-01

Electronic supplementary information

## **Nickel-Catalyzed Coupling of $R_2P(O)Me$ ( $R = \text{Aryl or Alkoxy}$ ) with (Hetero)arylmethyl Alcohols**

Wei-Ze Li<sup>a</sup> and Zhong-Xia Wang<sup>a,b,\*</sup>

<sup>a</sup> CAS Key Laboratory of Soft Matter Chemistry and Department of Chemistry, University of Science and Technology of China, Hefei, Anhui 230026, P. R. China.

E-mail: zzwang@ustc.edu.cn; Tel: +86 551 63603043

<sup>b</sup> Collaborative Innovation Center of Chemical Science and Engineering (Tianjin), Tianjin 300072, P. R. China

### **Table of Contents**

|   |                                                                                        |         |
|---|----------------------------------------------------------------------------------------|---------|
| 1 | NMR spectra of methyldiarylphosphine oxides                                            | S2-S9   |
| 2 | NMR spectra of cross-coupling products                                                 | S10-S61 |
| 3 | NMR spectrum of reduction product of $Ph_2P(O)CH_2CH_2Ph$ ( <b>3a</b> ) with $HSiCl_3$ | S62-S63 |
| 4 | $^1H$ NMR spectrum of reaction product of $Ph_2P(O)Me$ with $PhCD_2OH$                 | S64     |

## Copies of NMR spectra

### 1. NMR spectra of methyldiarylphosphine oxides

#### (1) Methyldi-*p*-tolylphosphine oxide

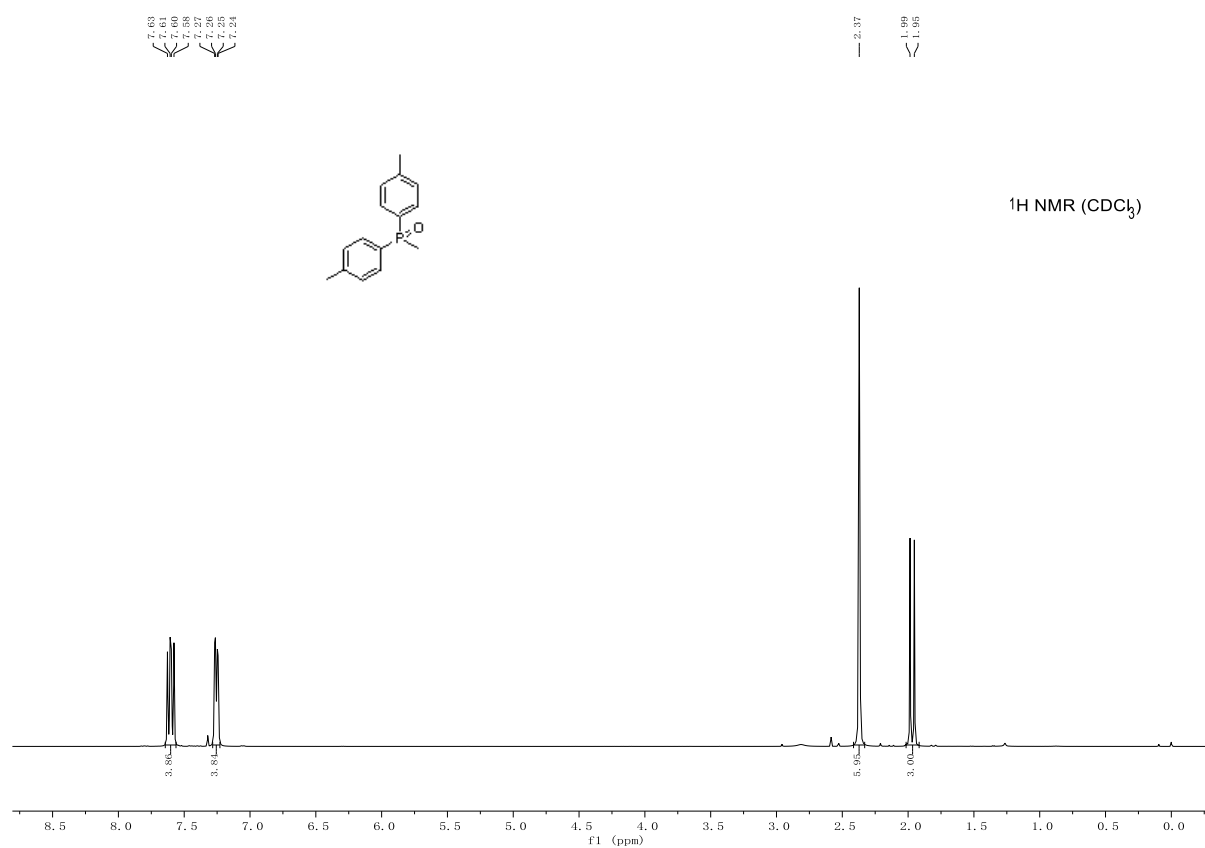

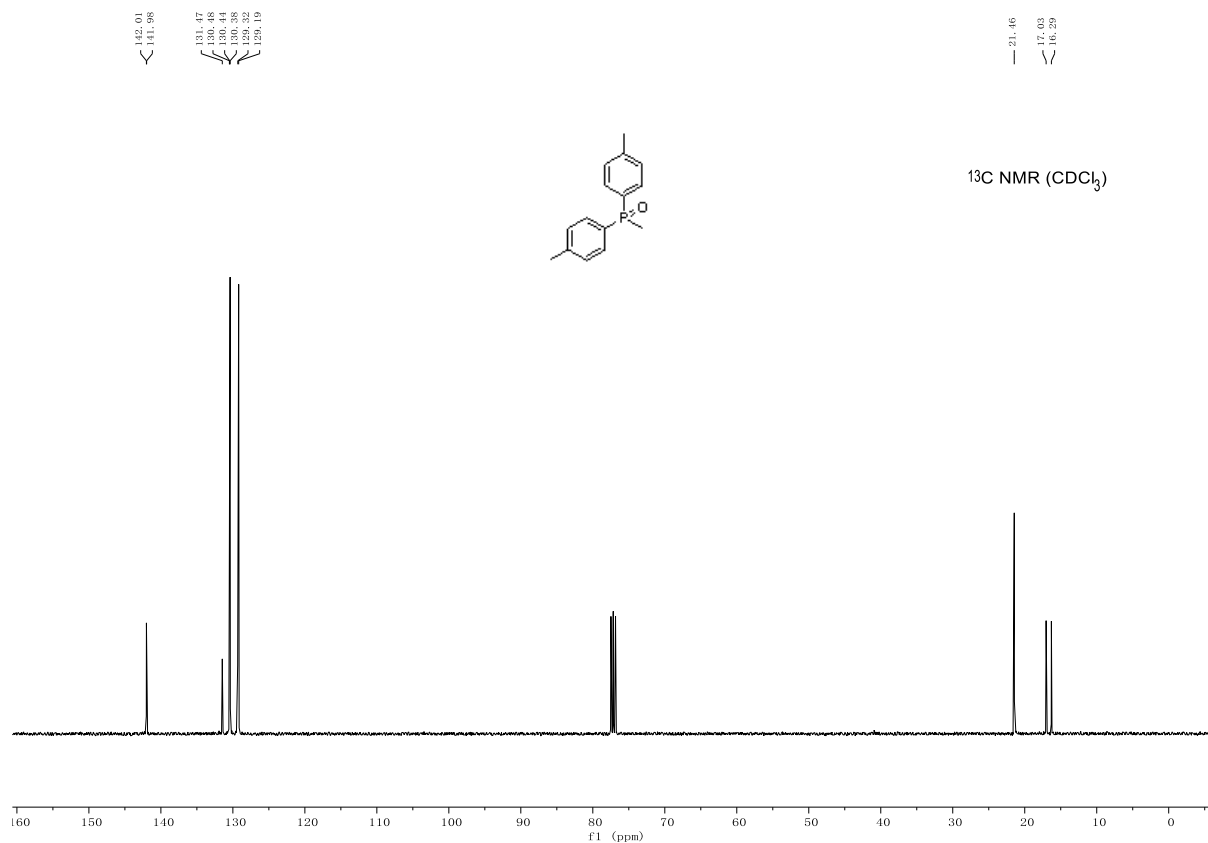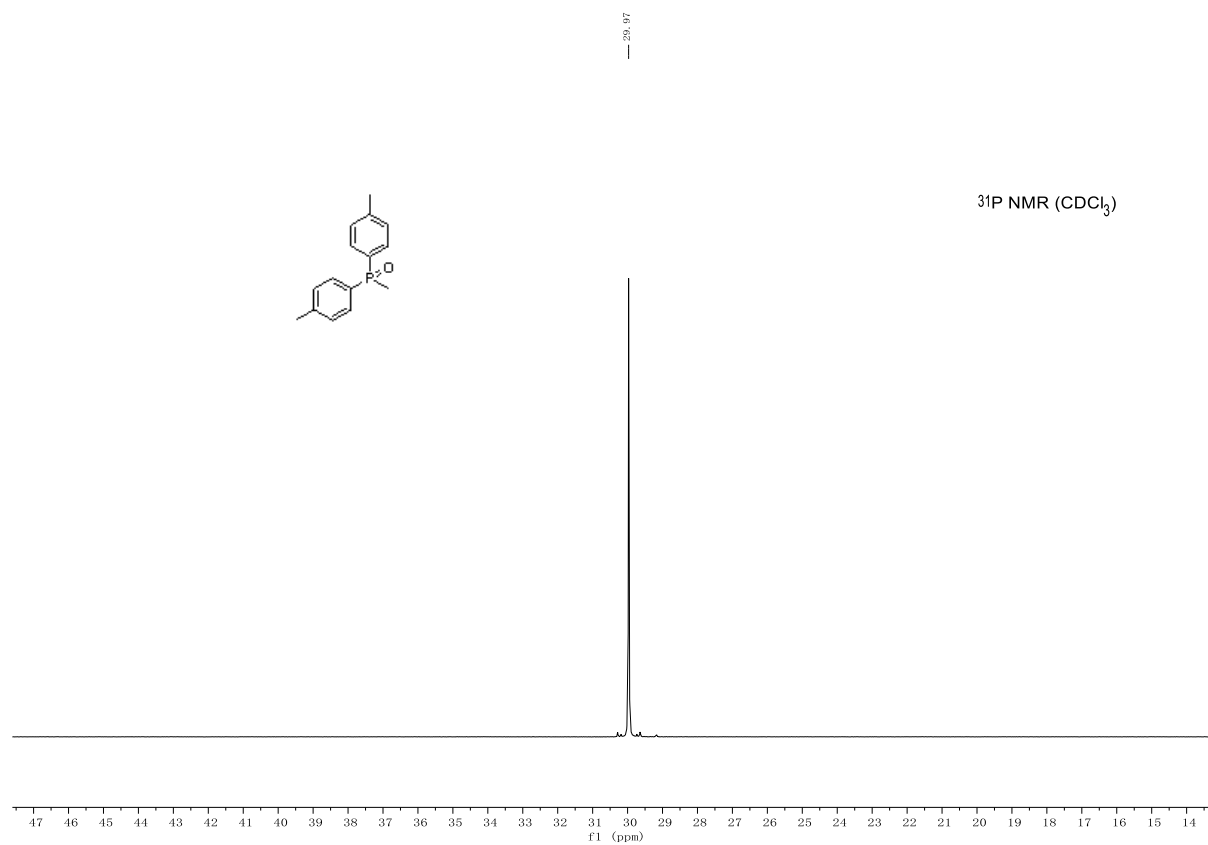

## (2) Bis(4-(dimethylamino)phenyl)(methyl)phosphine oxide

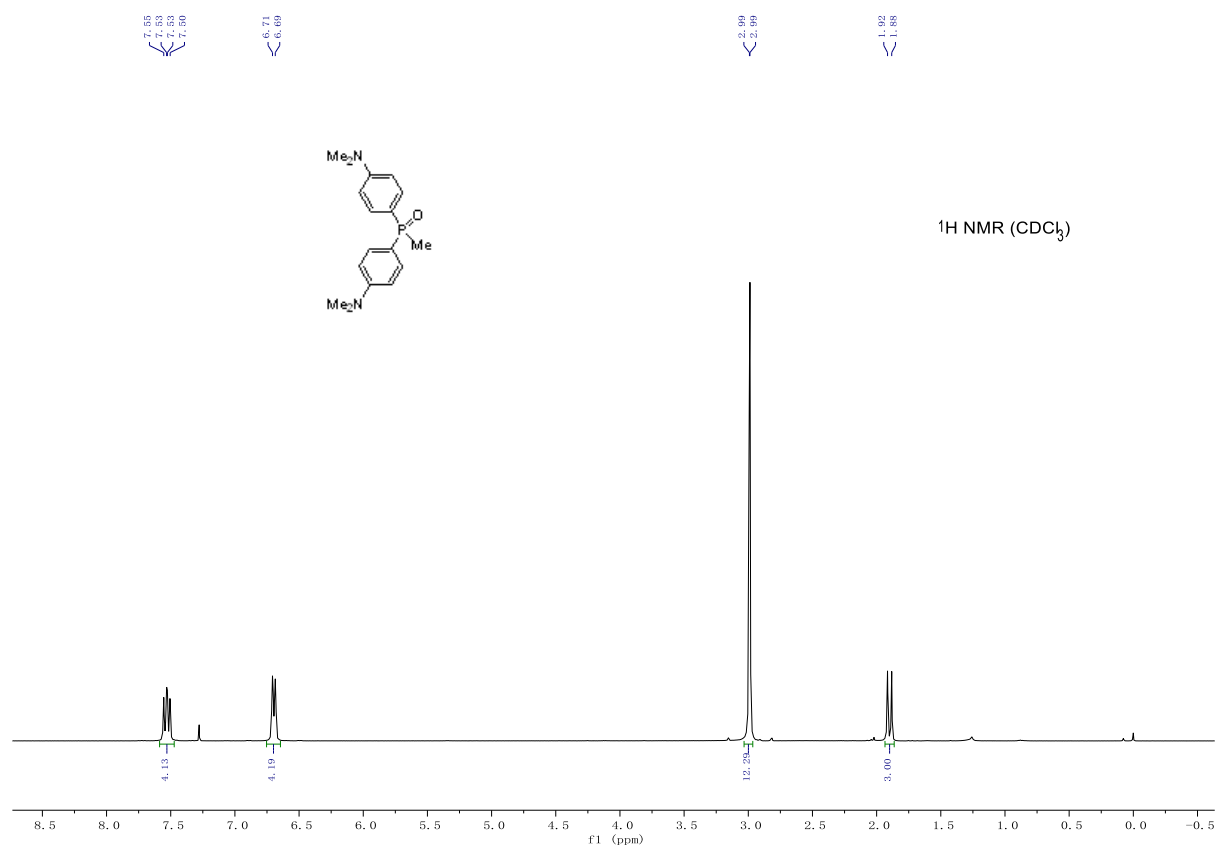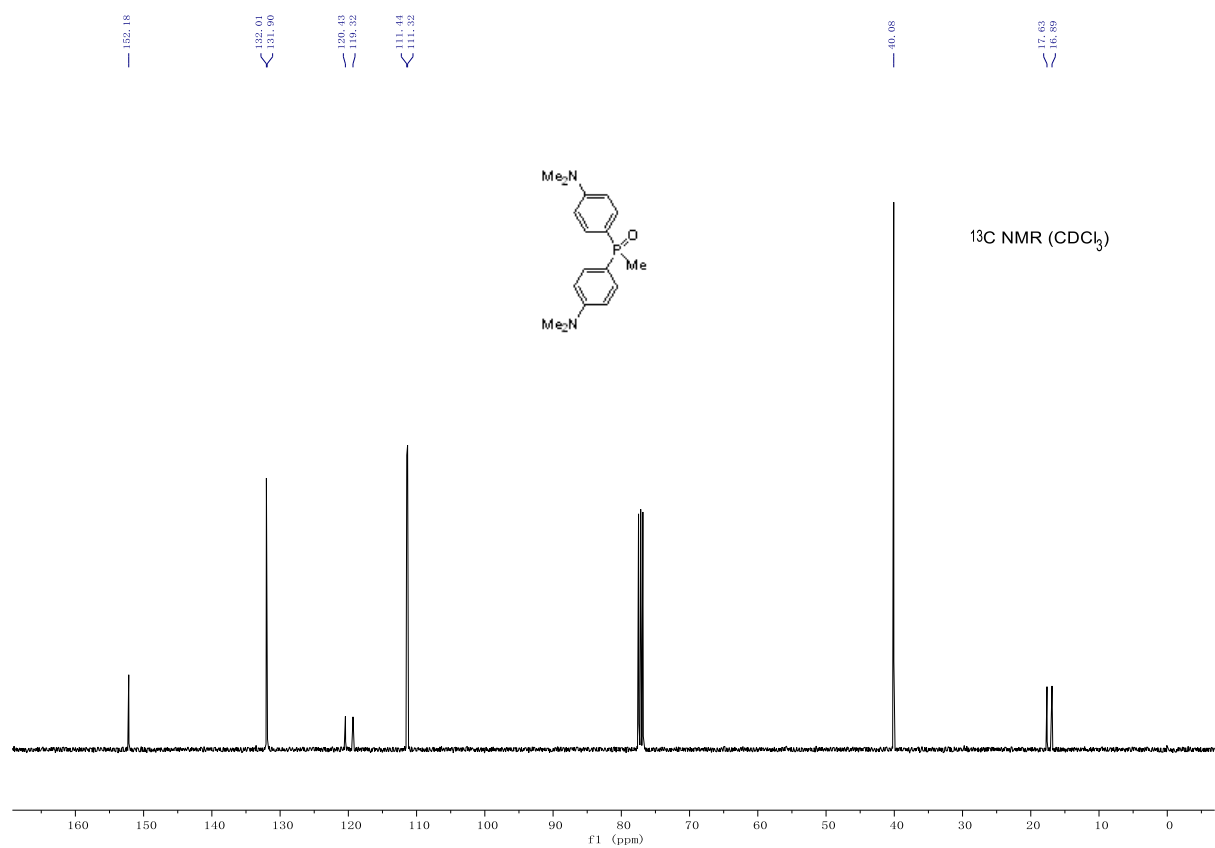

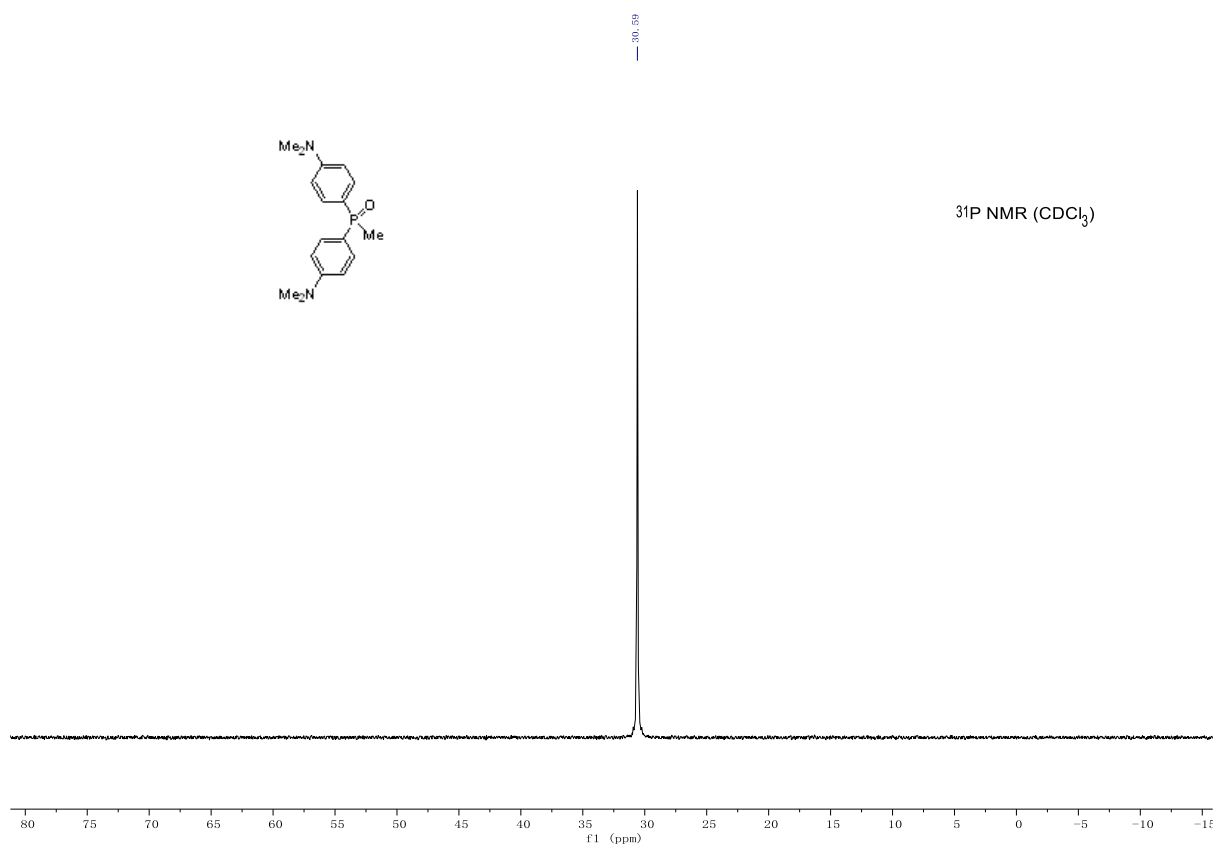

### (3) Bis(3-methoxyphenyl)(methyl)phosphine oxide

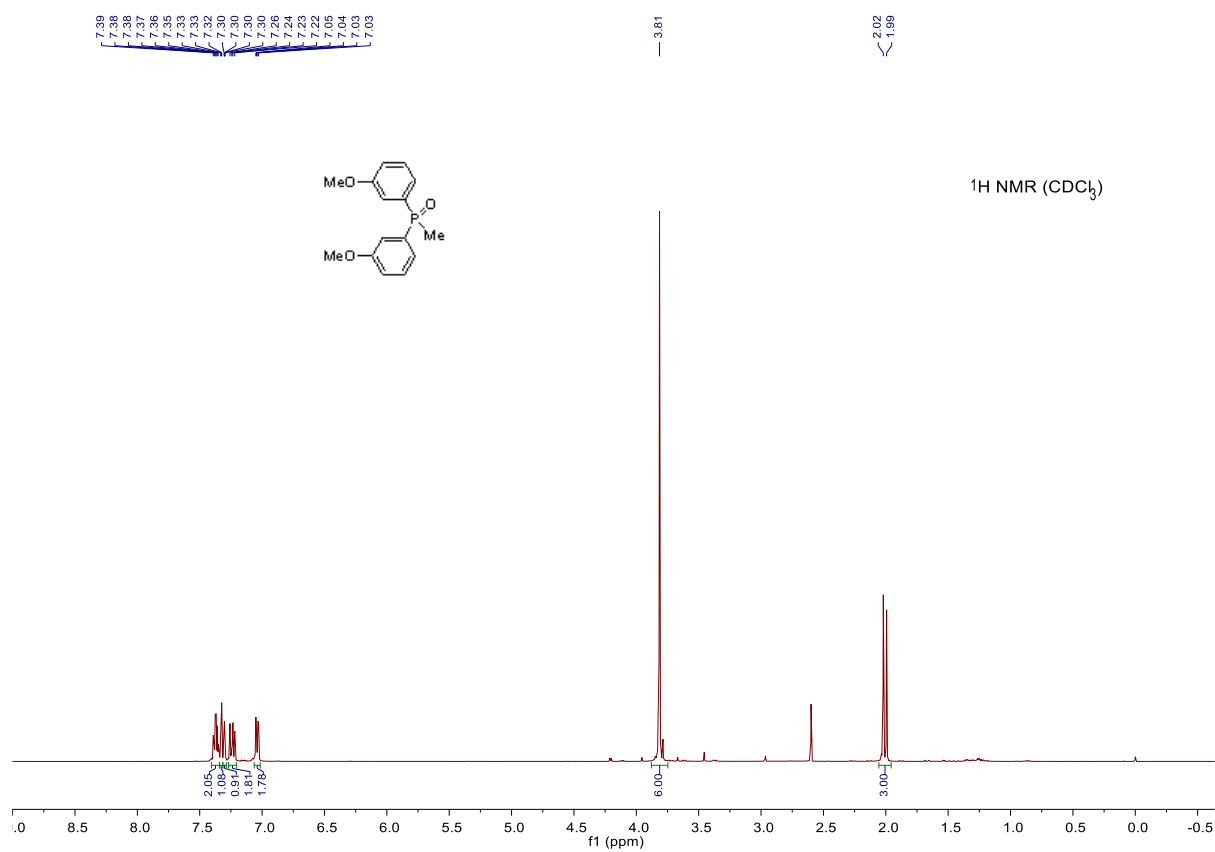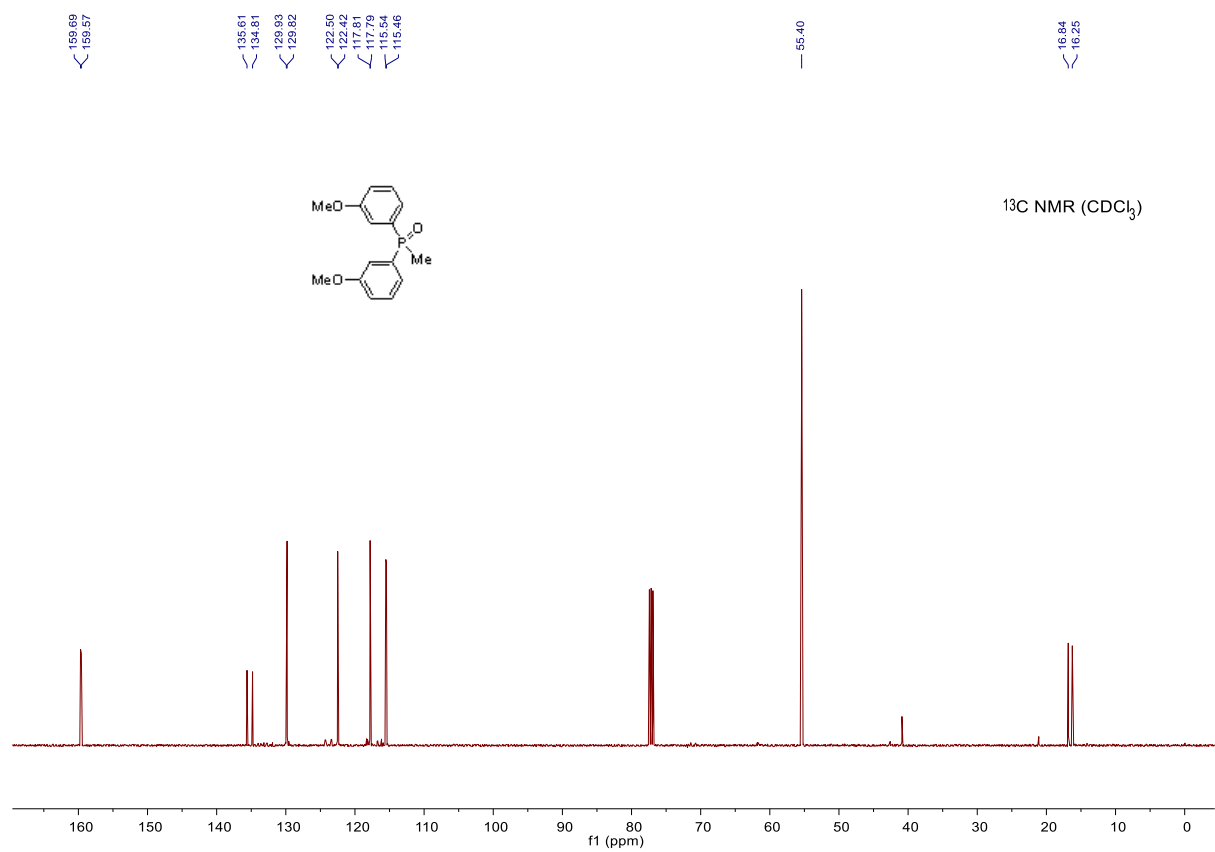

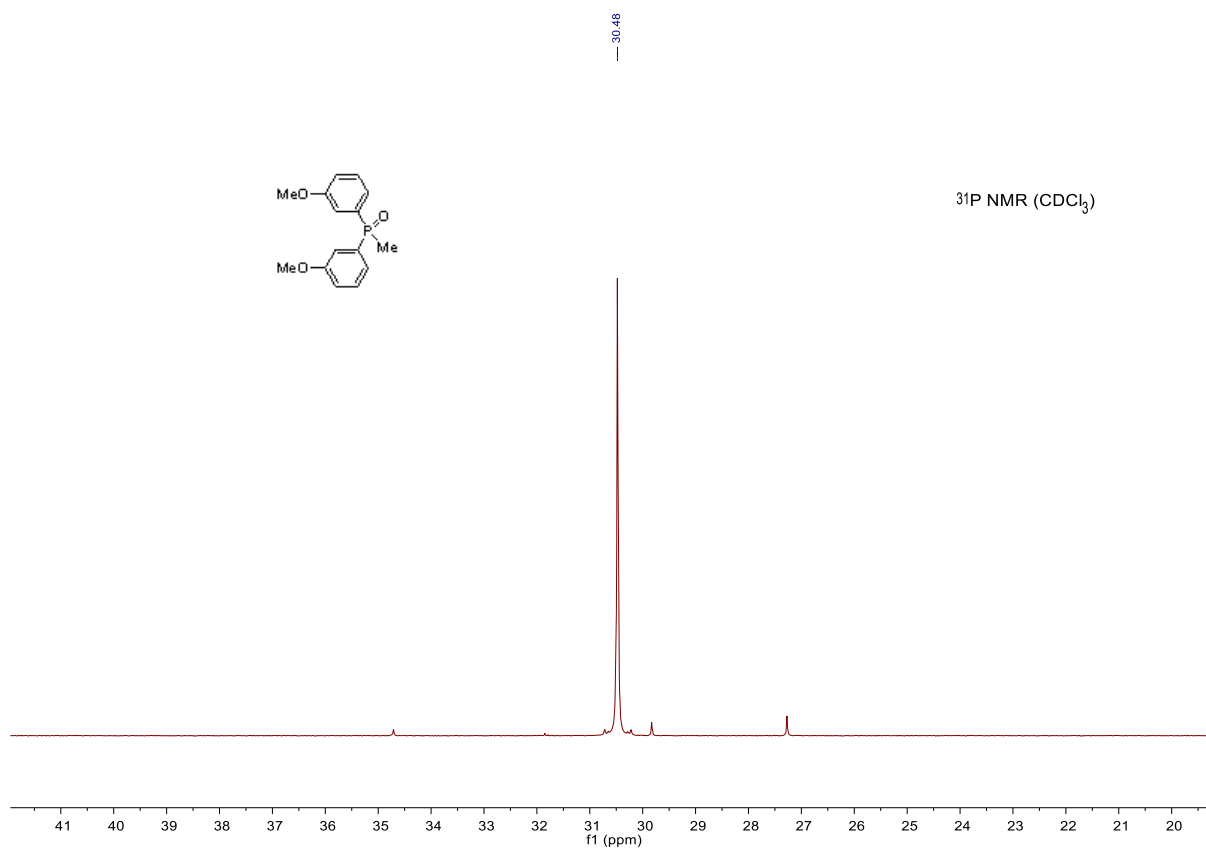

Chemical structure of the compound is shown above the spectrum:

COP(=O)(c1ccc2ccccc2cc1)c3ccc4ccccc43

<sup>1</sup>H NMR (CDCl<sub>3</sub>) spectrum showing peaks in the aromatic region (7.5-8.5 ppm) and a methoxy singlet (~3.8 ppm). Integration values are provided below the baseline.

| Chemical Shift (ppm) | Integration |
|----------------------|-------------|
| ~8.45                | 2.07        |
| ~7.95                | 4.23        |
| ~7.85                | 2.02        |
| ~7.75                | 4.15        |
| ~3.85                | 3.00        |

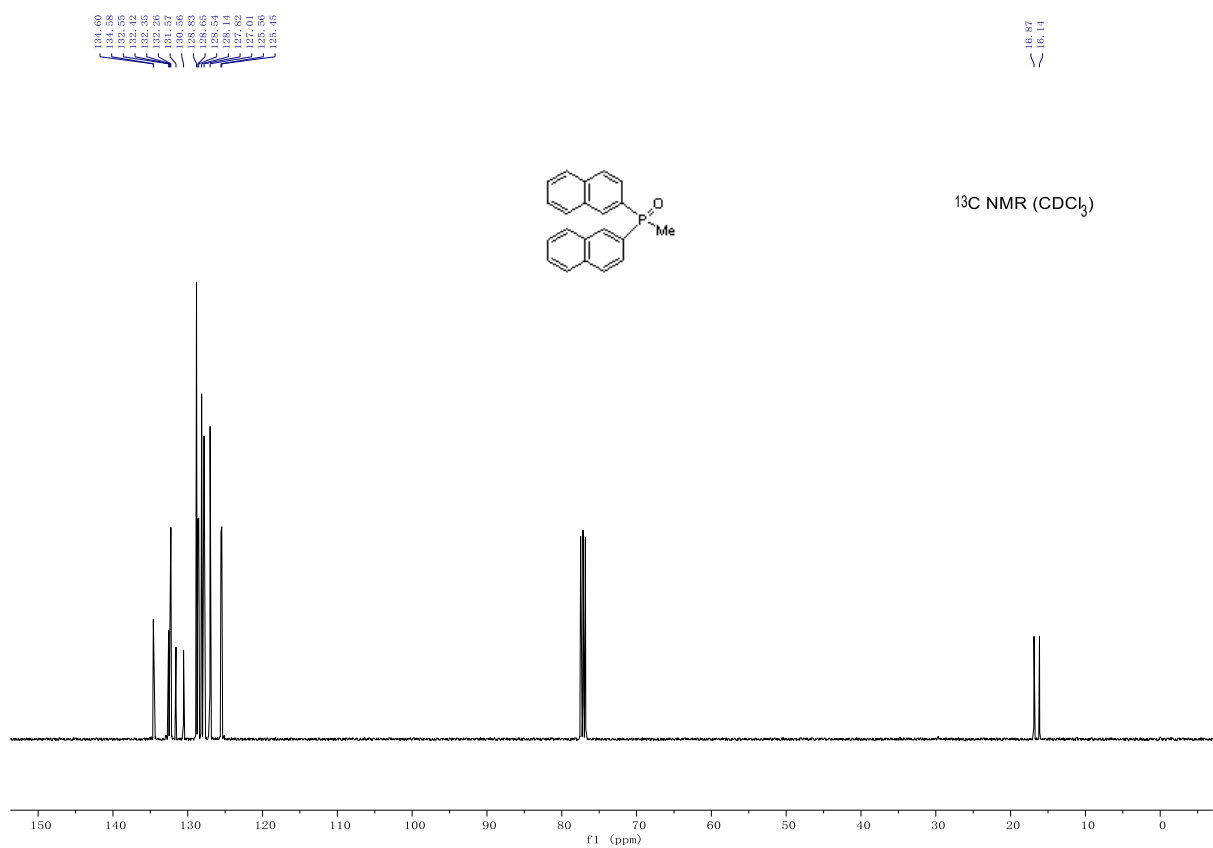



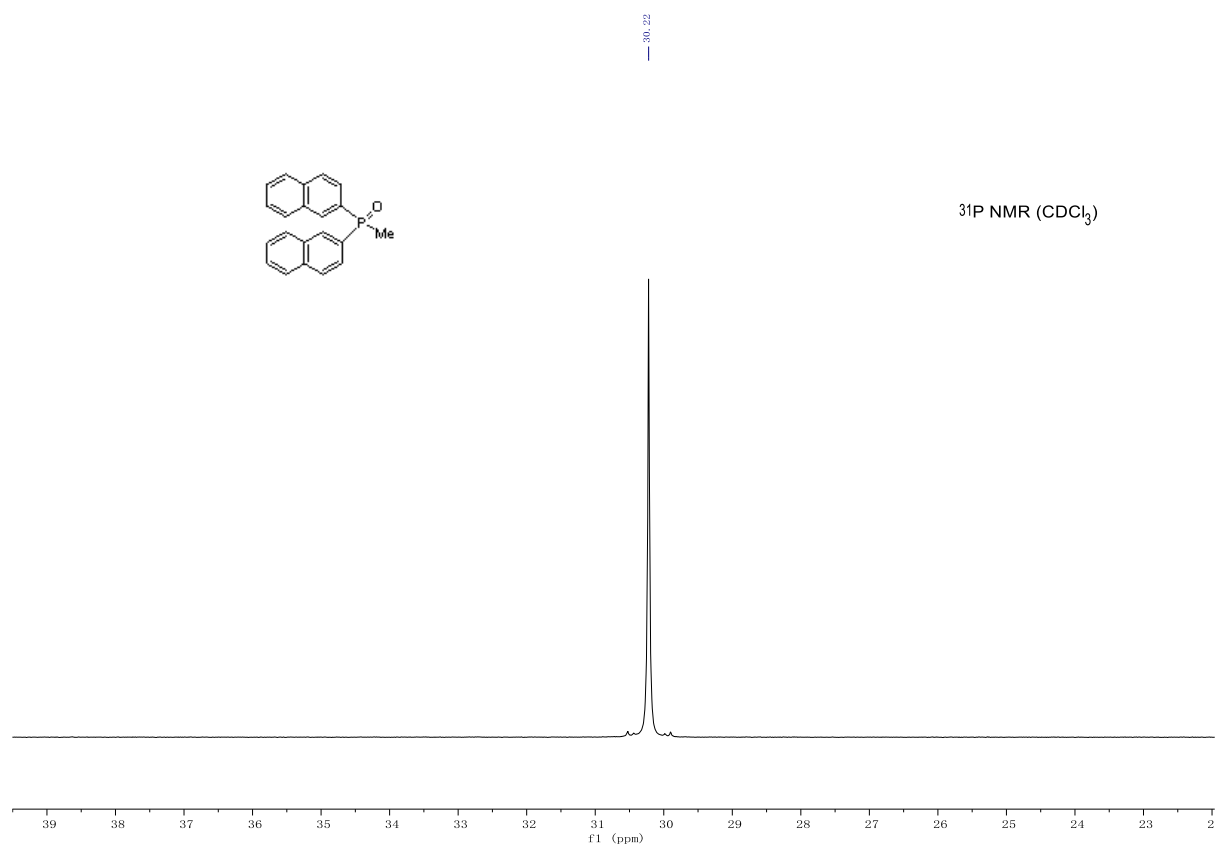

## 2 NMR spectra of cross-coupling products

### (1) Phenethyldiphenylphosphine oxide (**3a**)

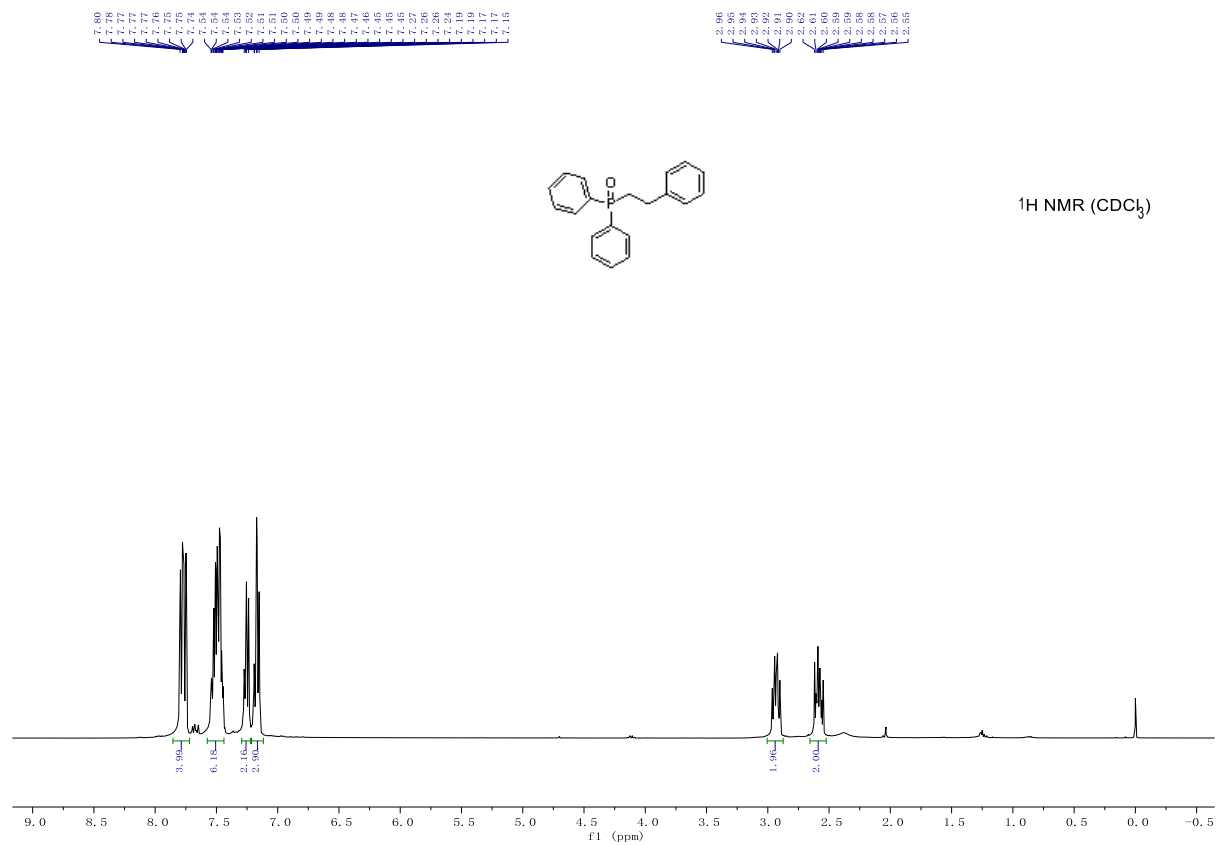

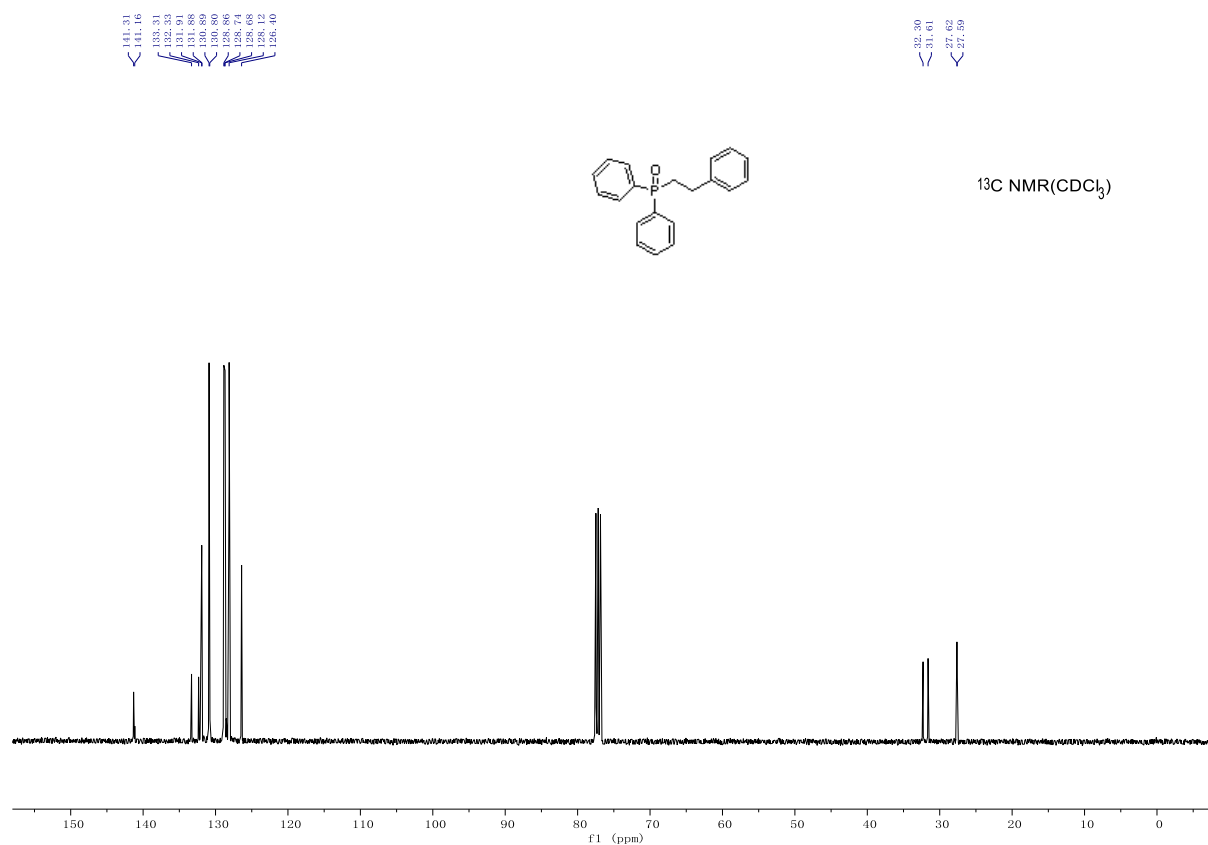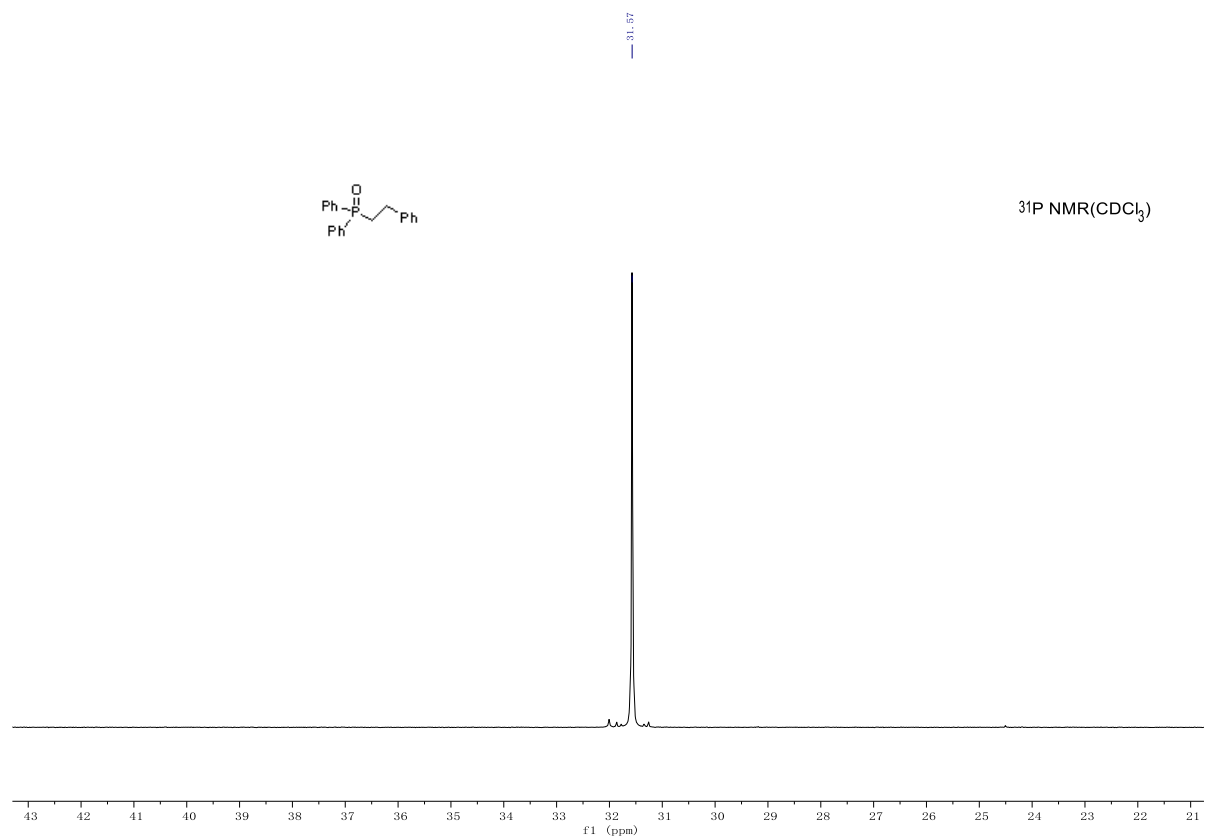

(2) (4-Methylphenethyl)diphenylphosphine oxide (**3b**)

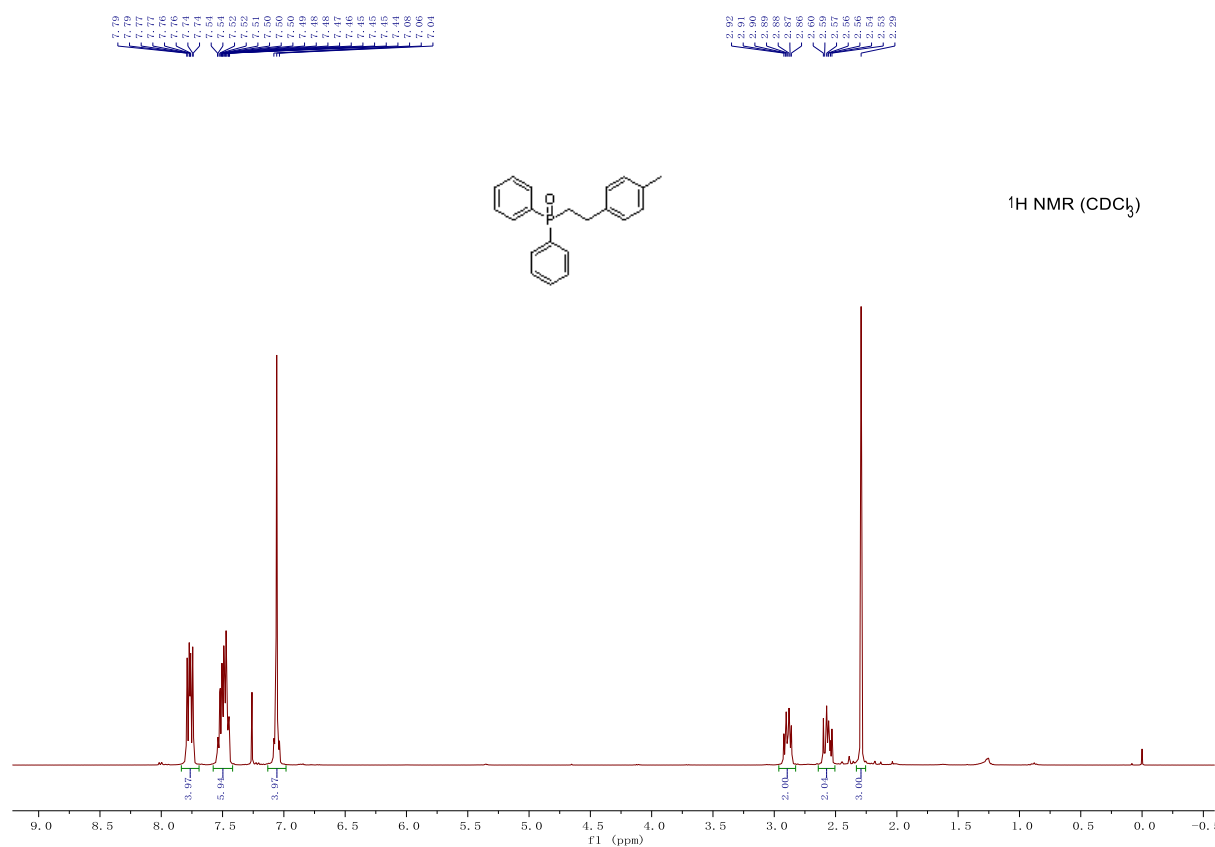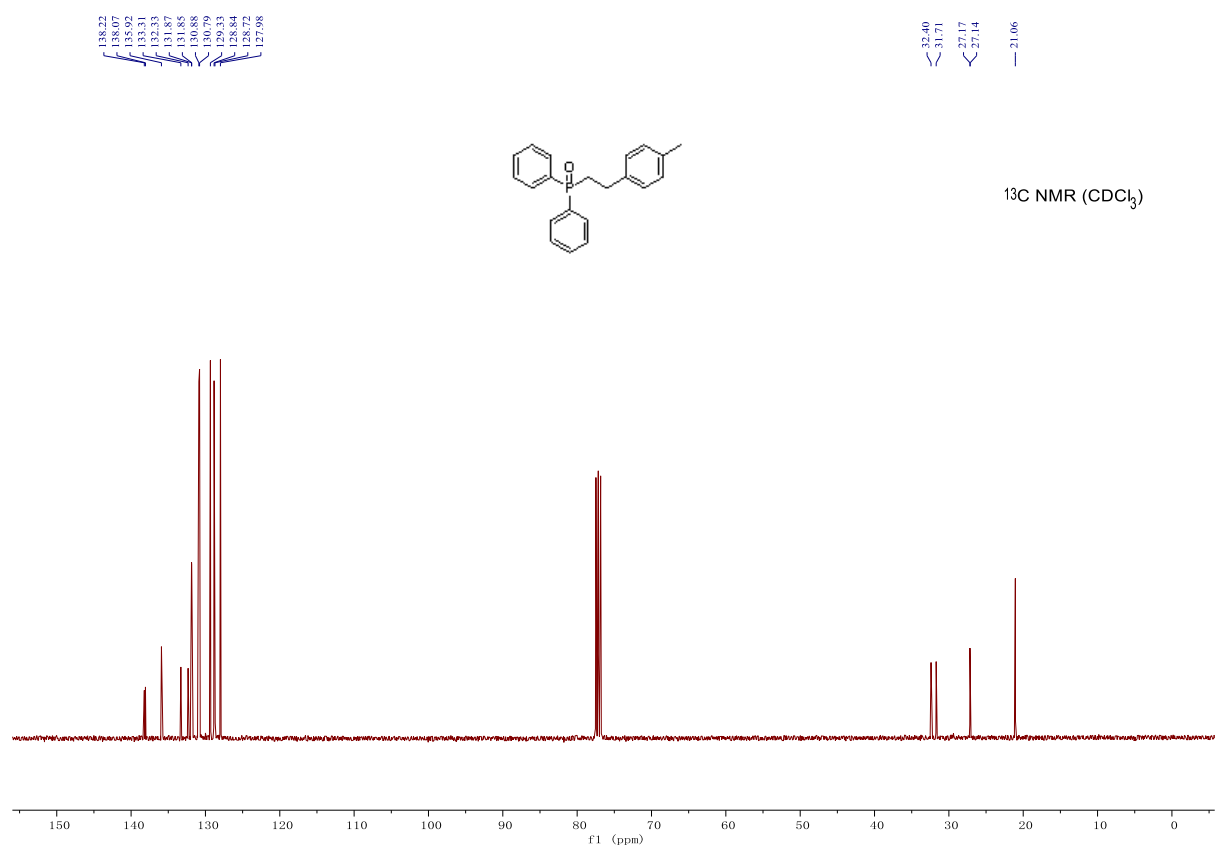

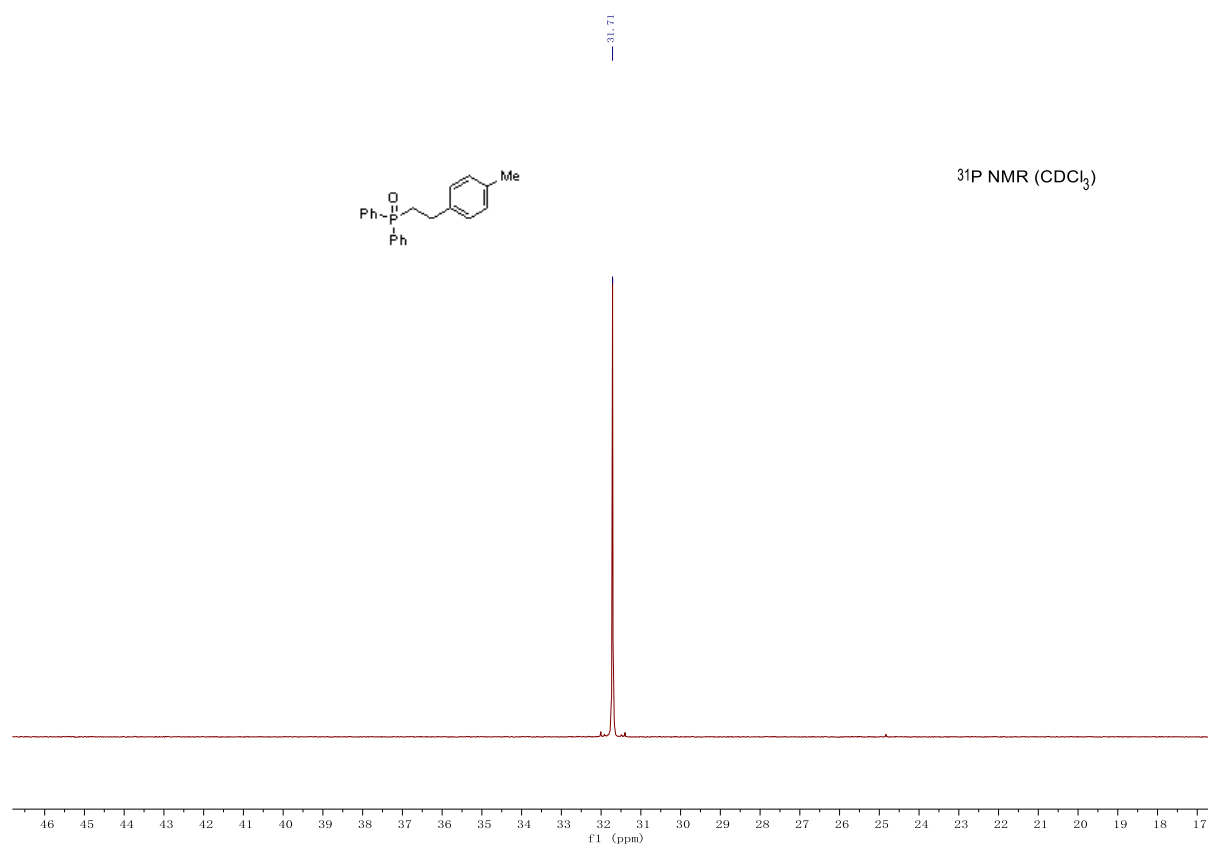

(3) (4-(*tert*-Butyl)phenethyl)diphenylphosphine oxide (**3c**)

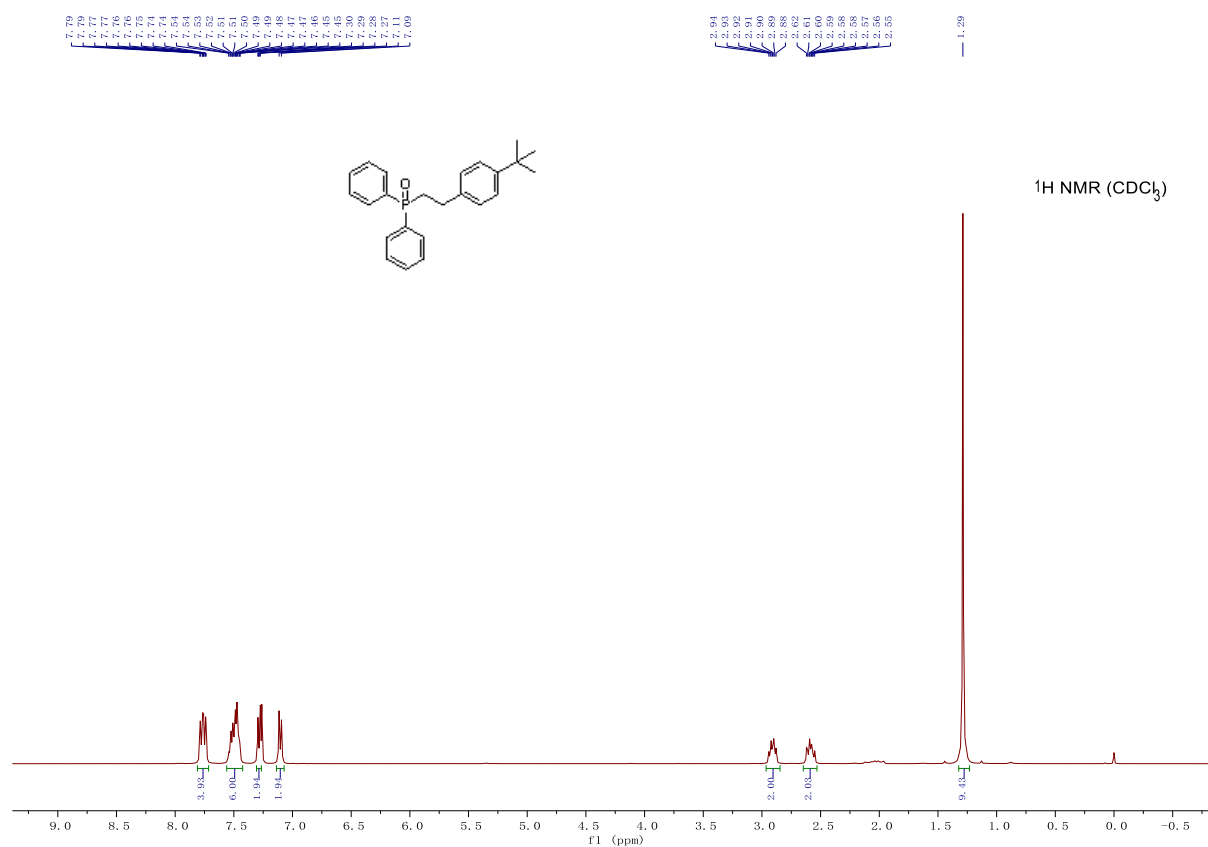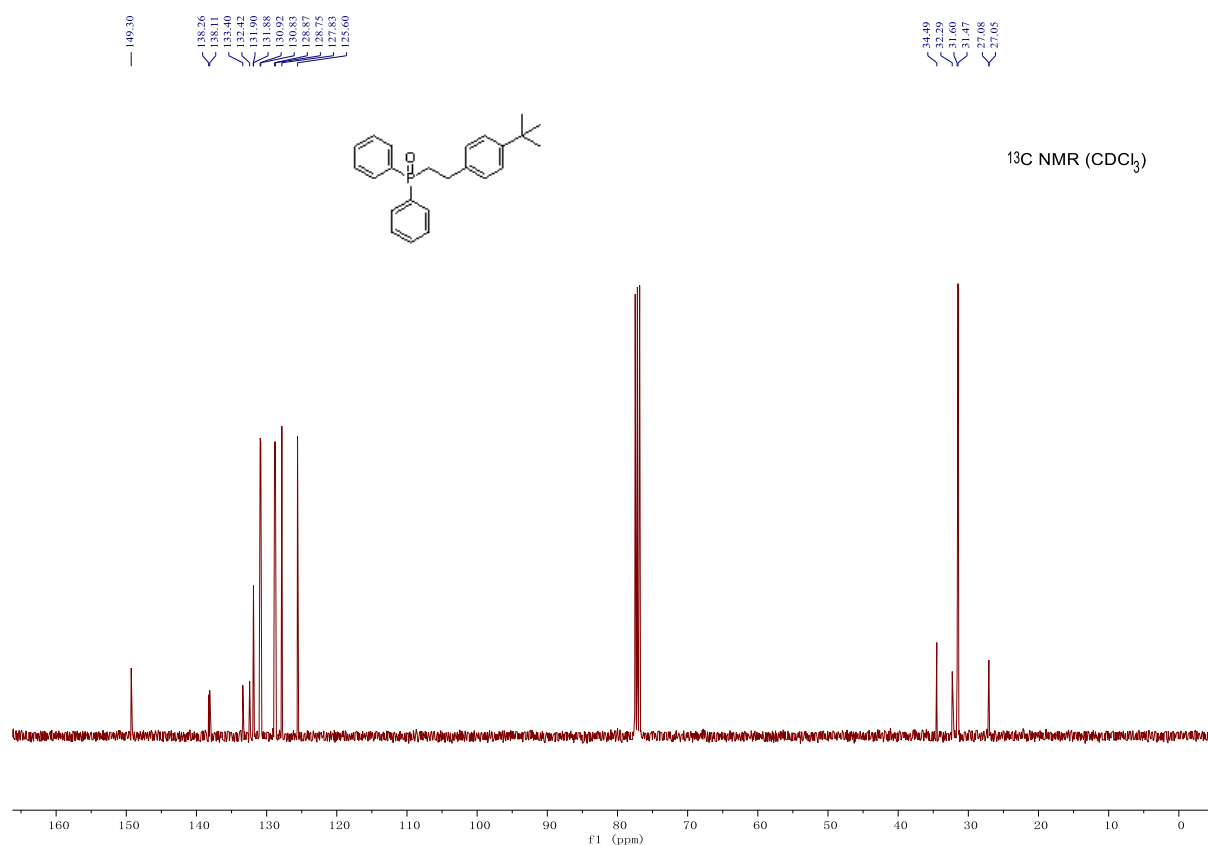

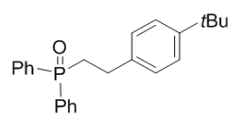

<sup>1</sup>H NMR (CDCl<sub>3</sub>)

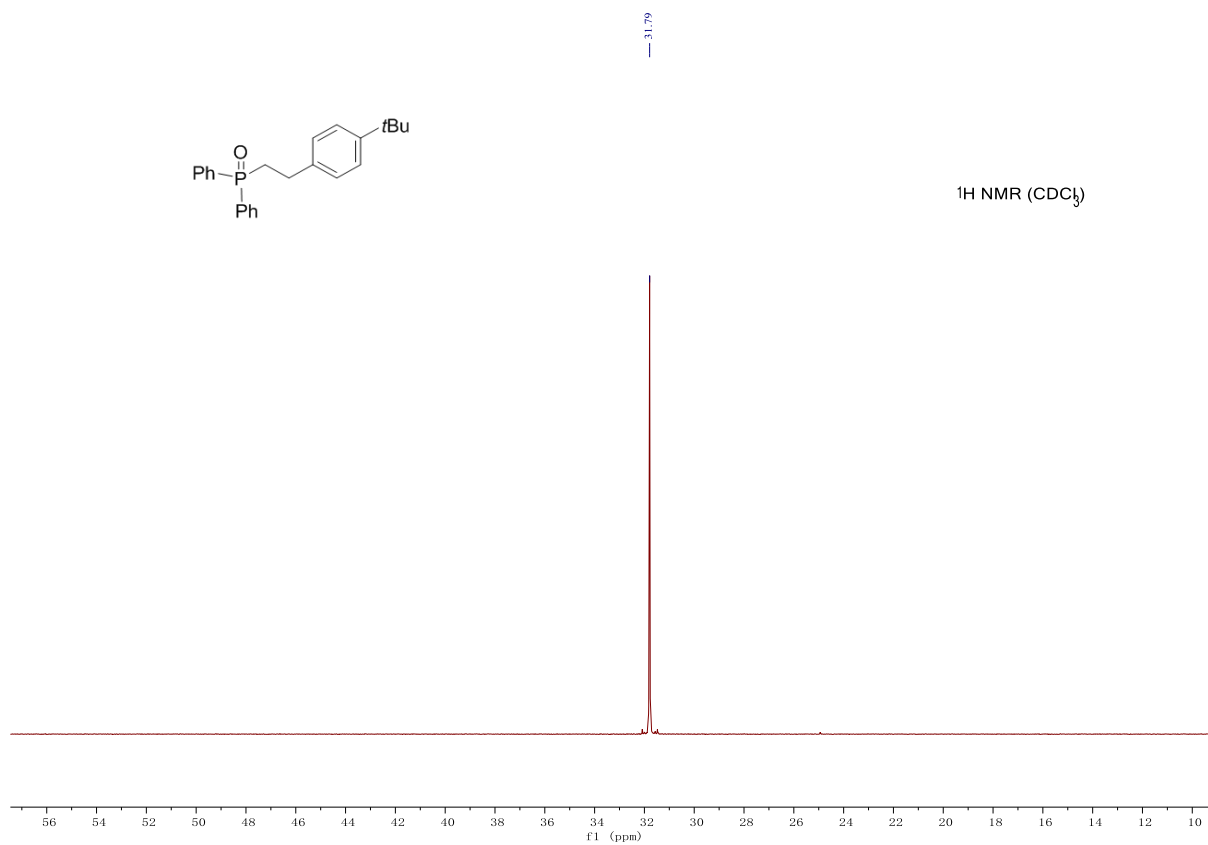

(4) (2,4-Dimethylphenethyl)diphenylphosphine oxide (**3d**)

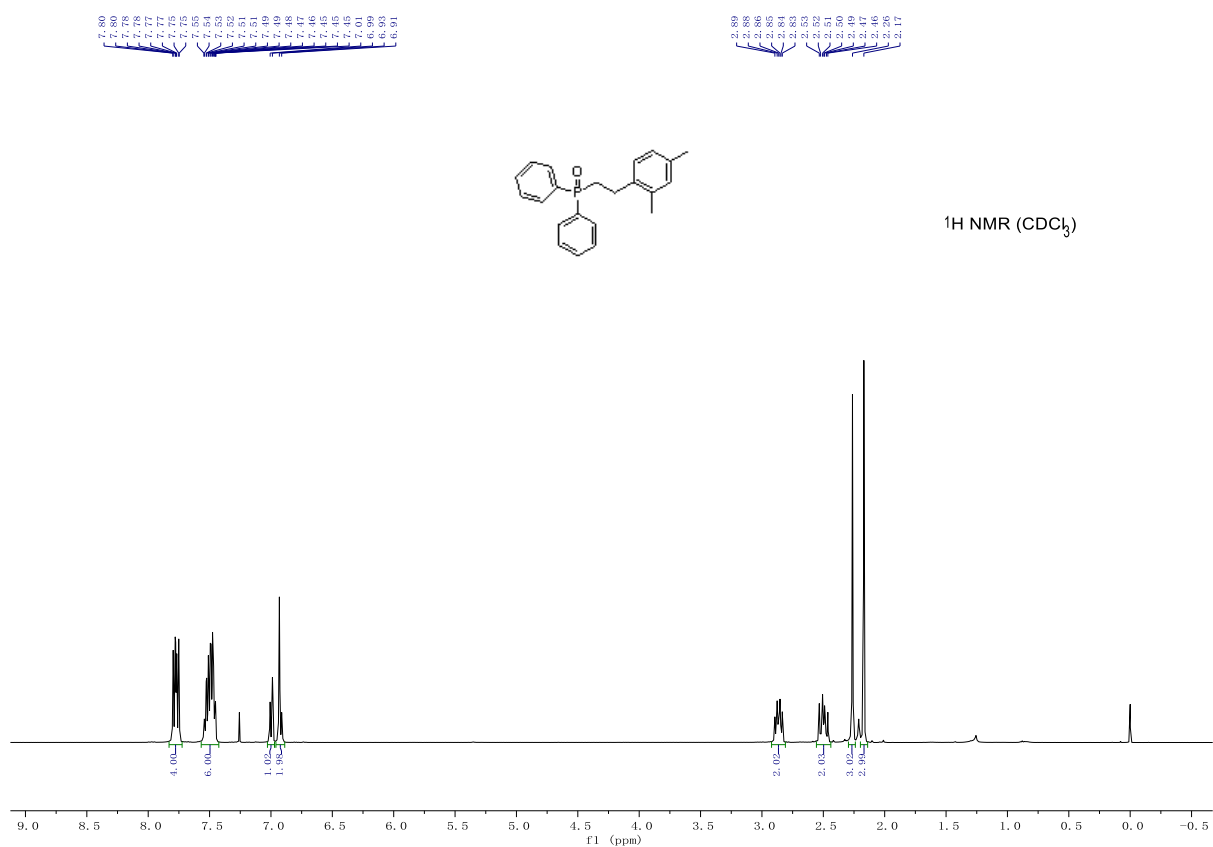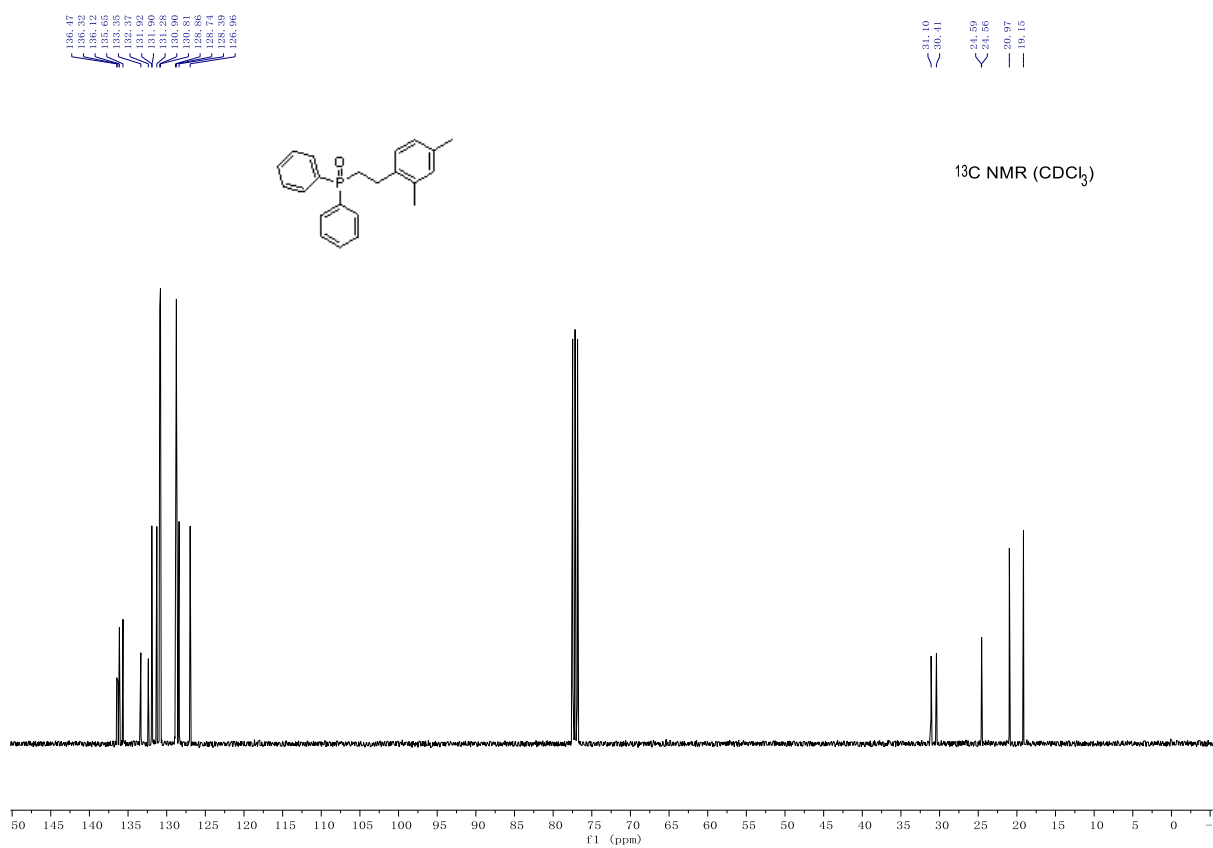



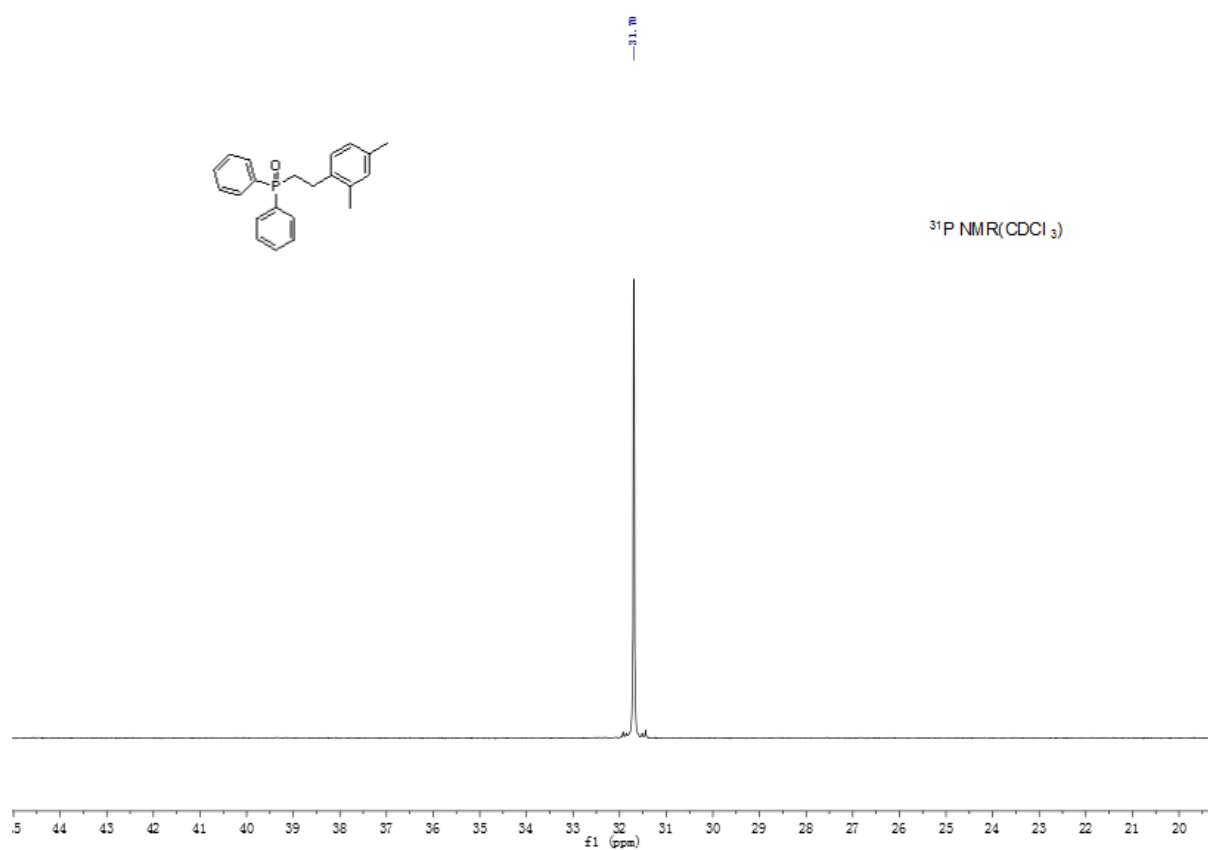

(5) (4-(Methylthio)phenethyl)diphenylphosphine oxide (**3e**)

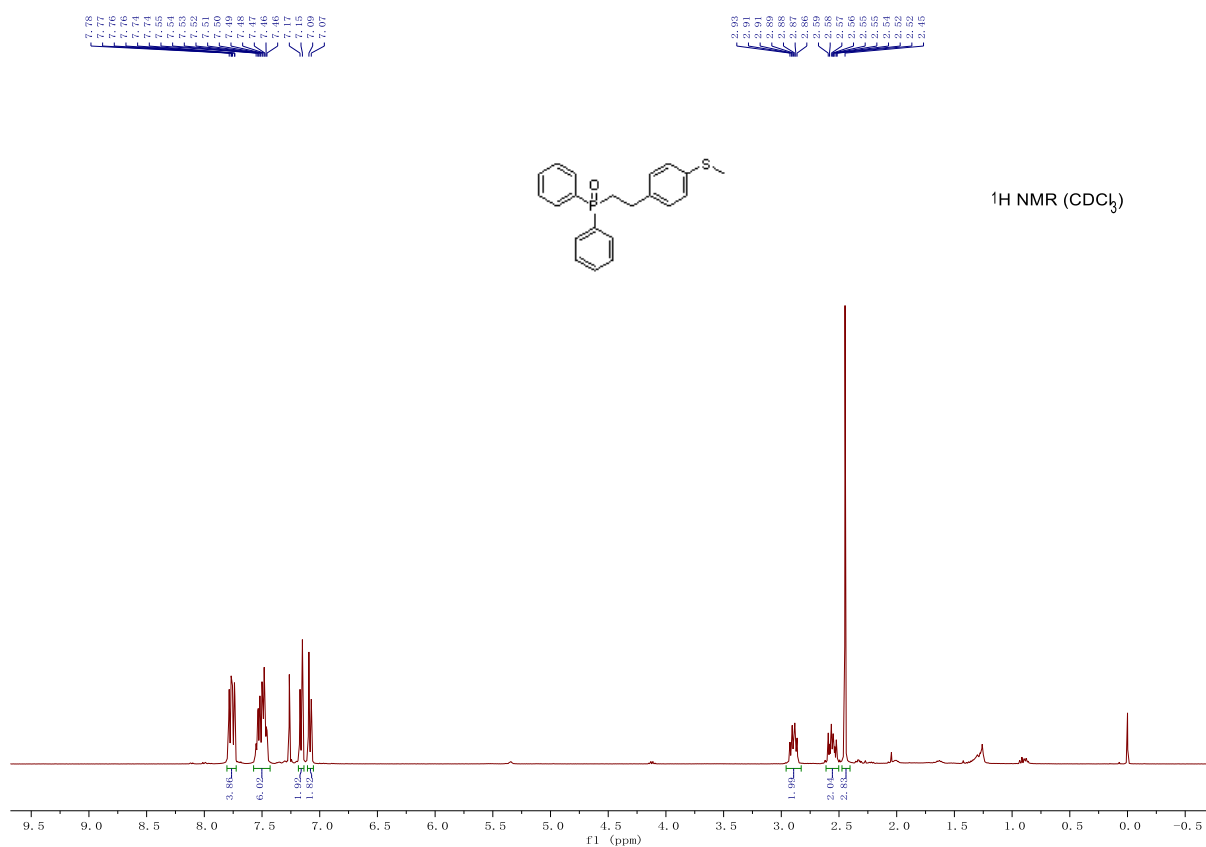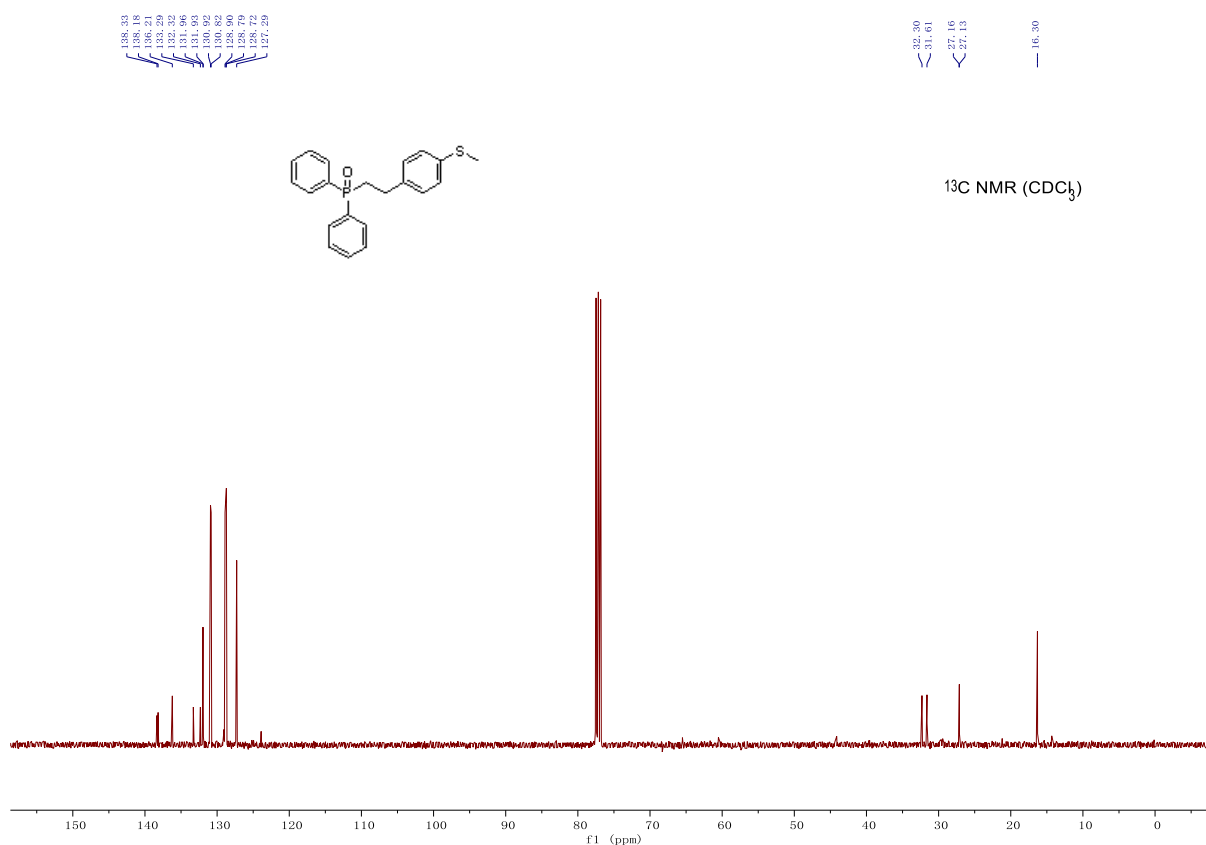

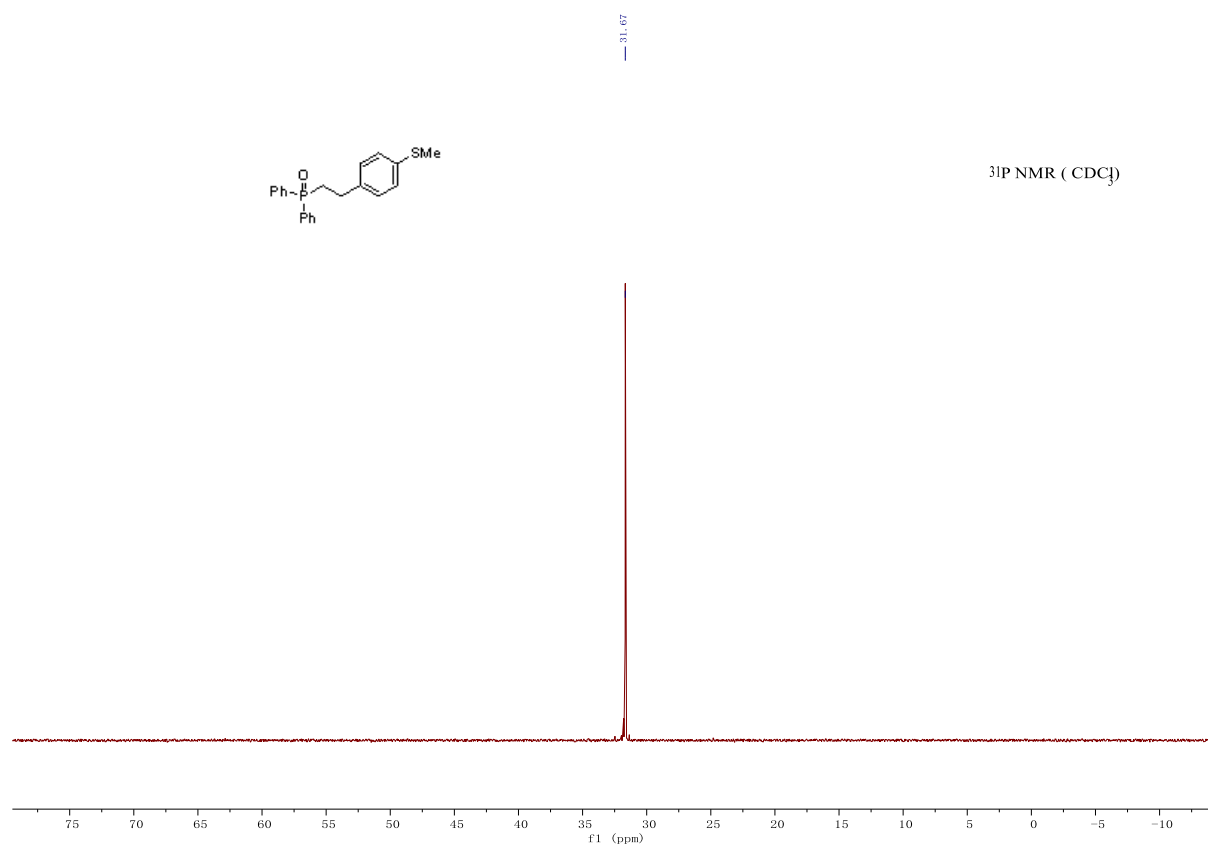

(6) (4-Methoxyphenethyl)diphenylphosphine oxide (**3f**)

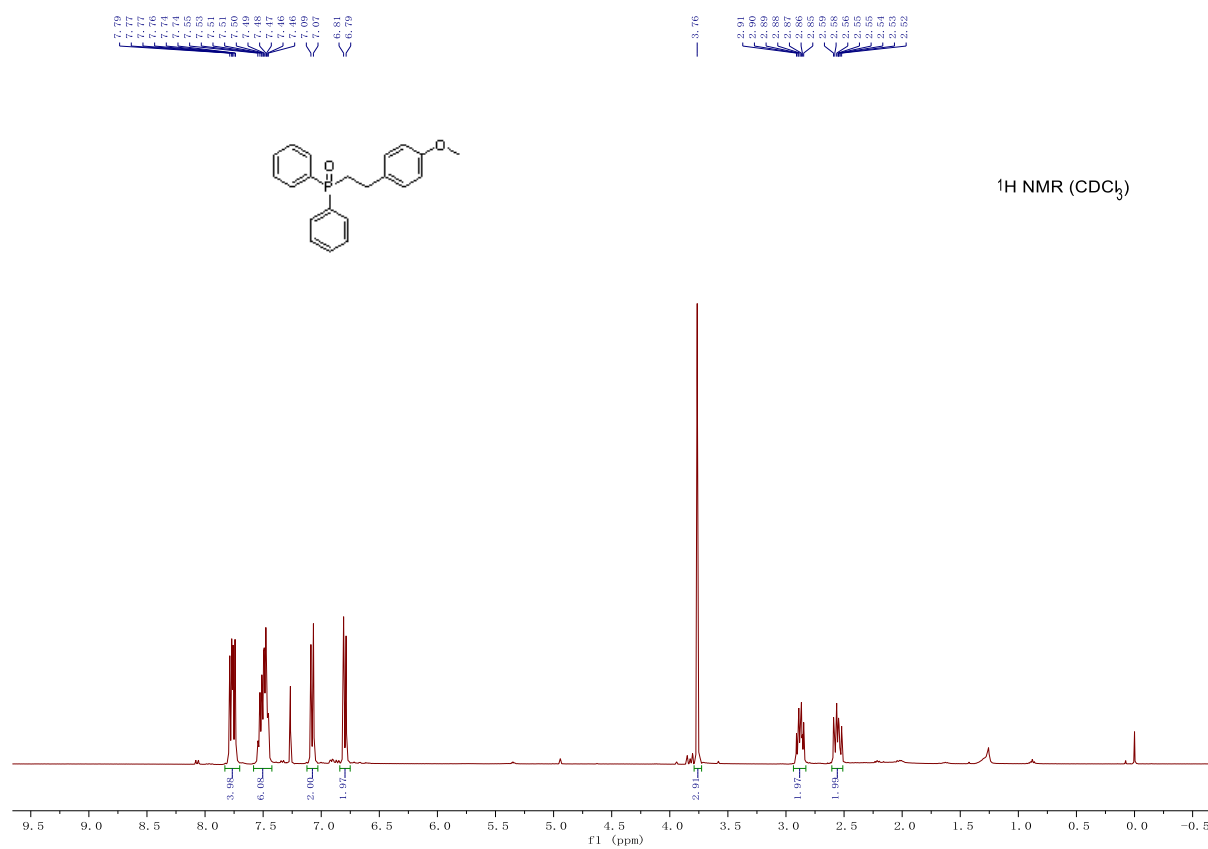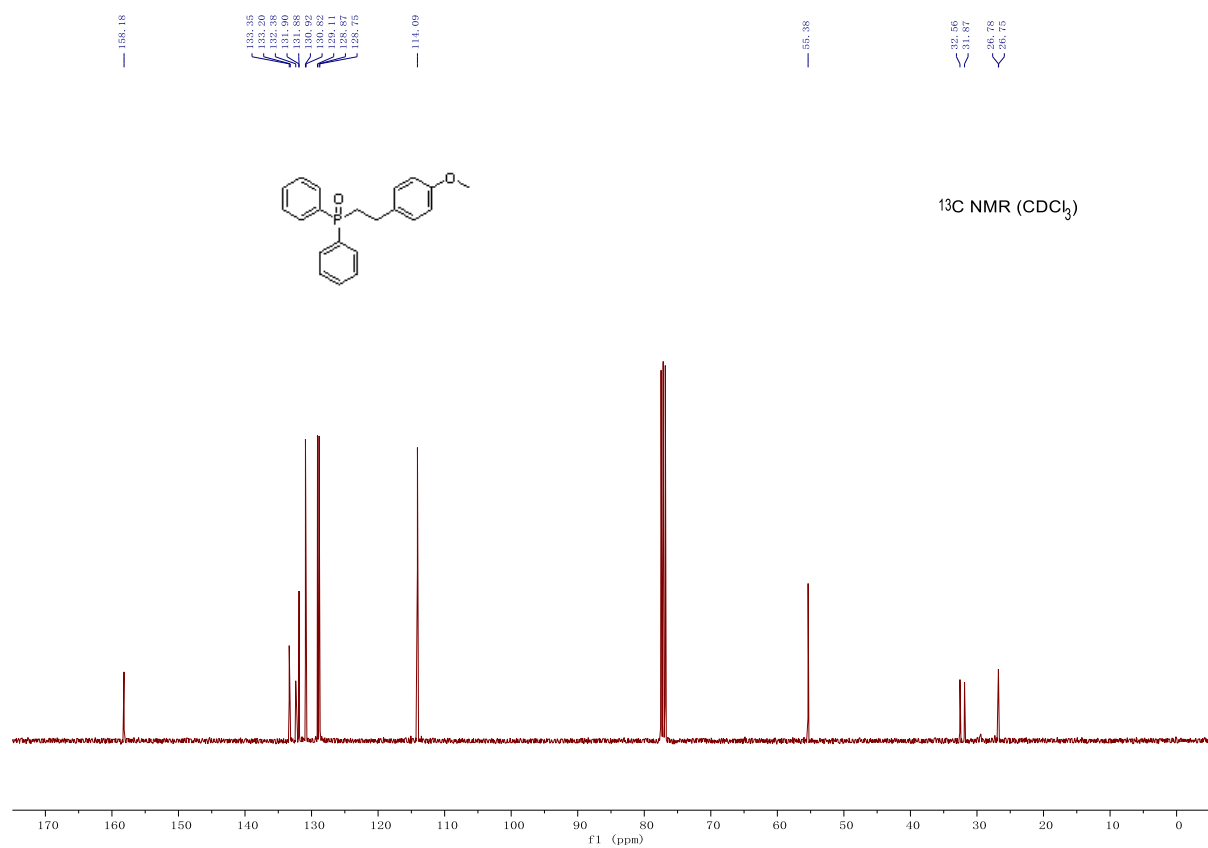

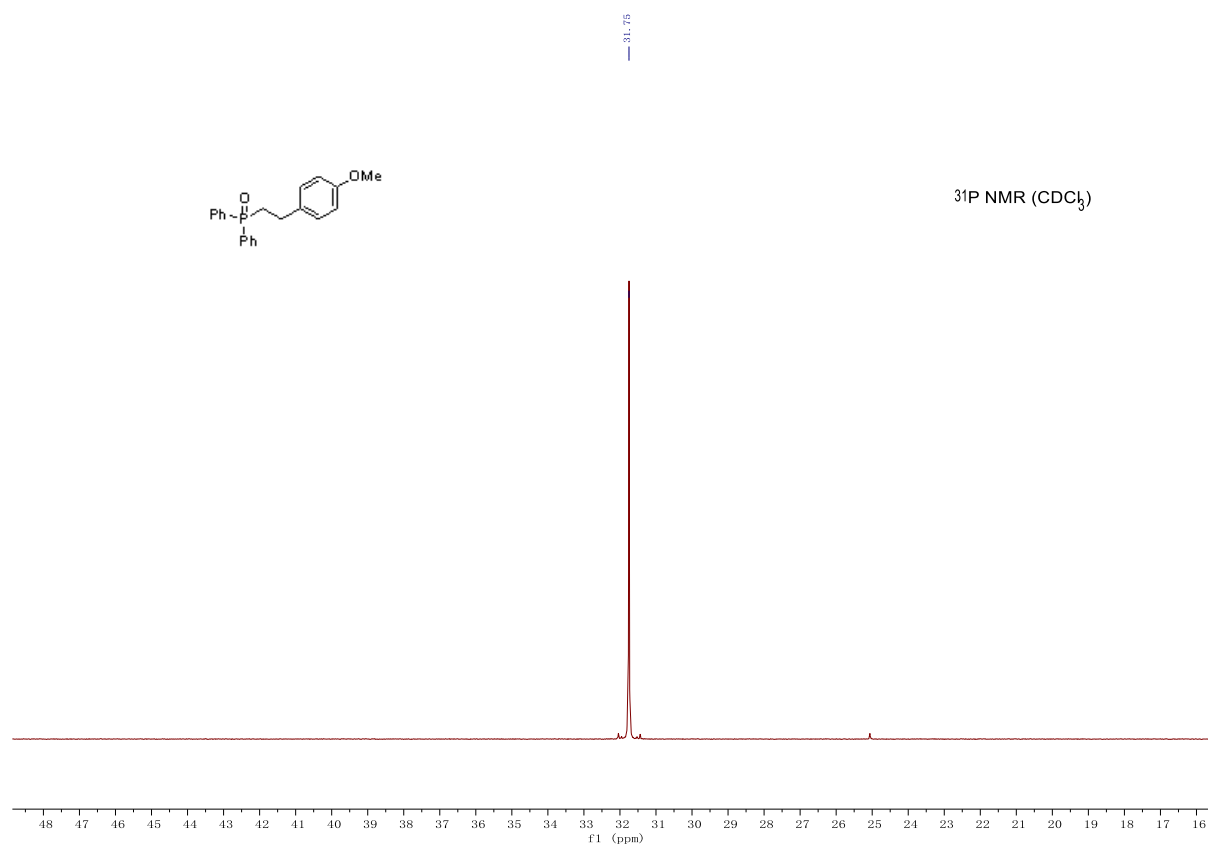

(7) (3-Methoxyphenethyl)diphenylphosphine oxide (**3g**)

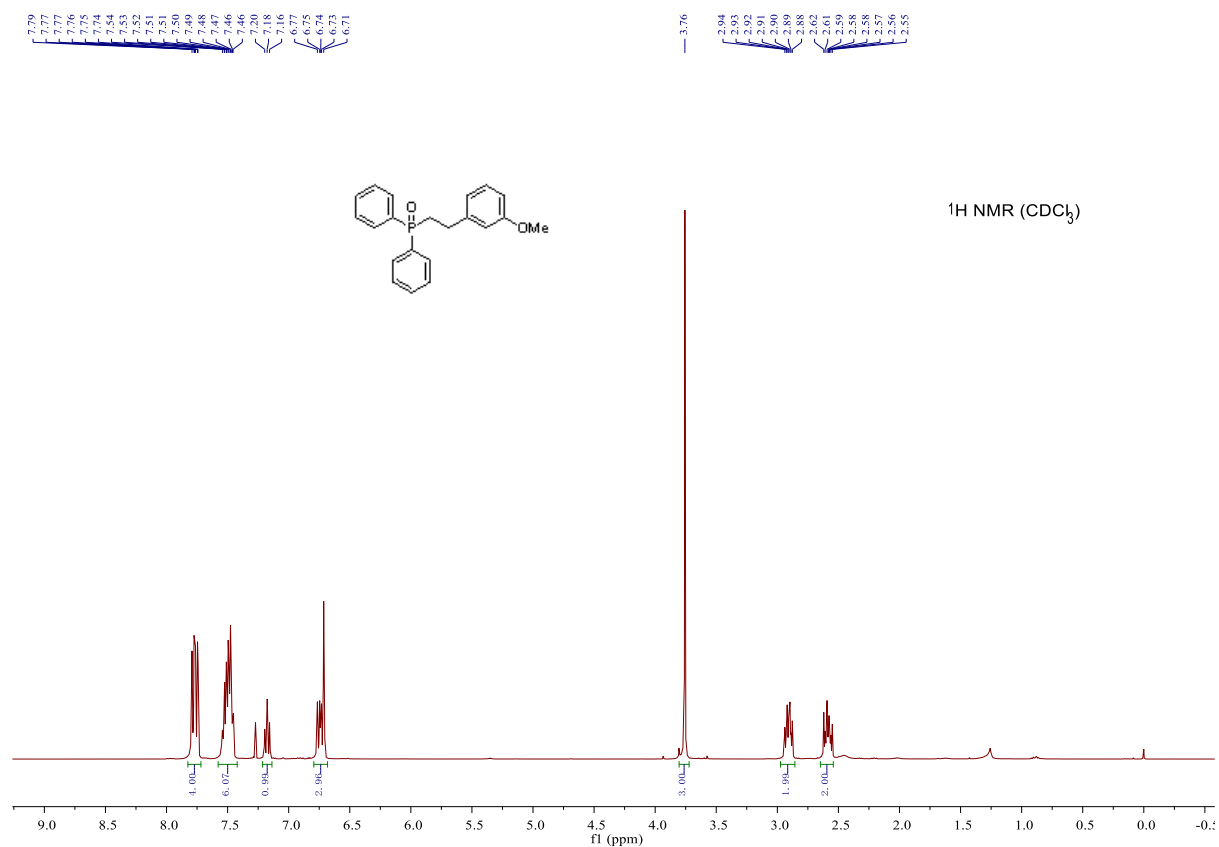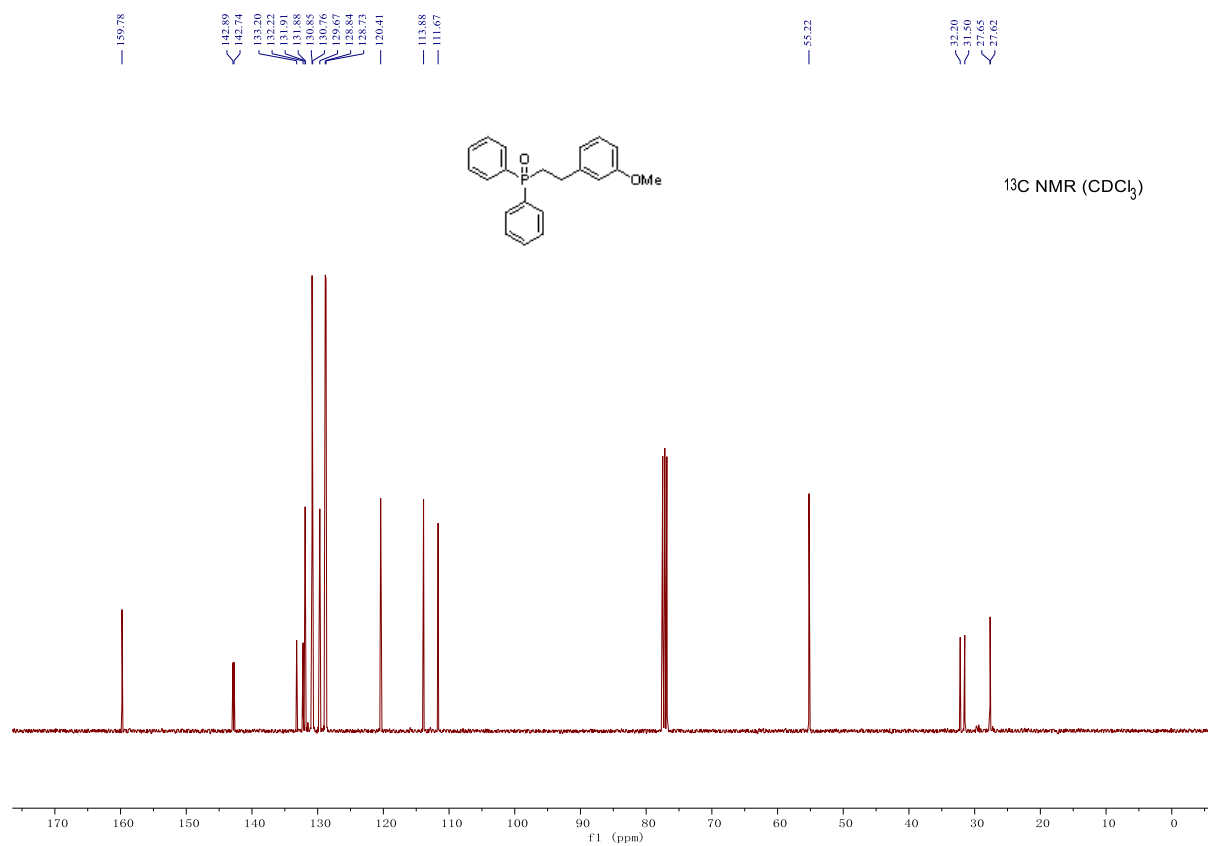

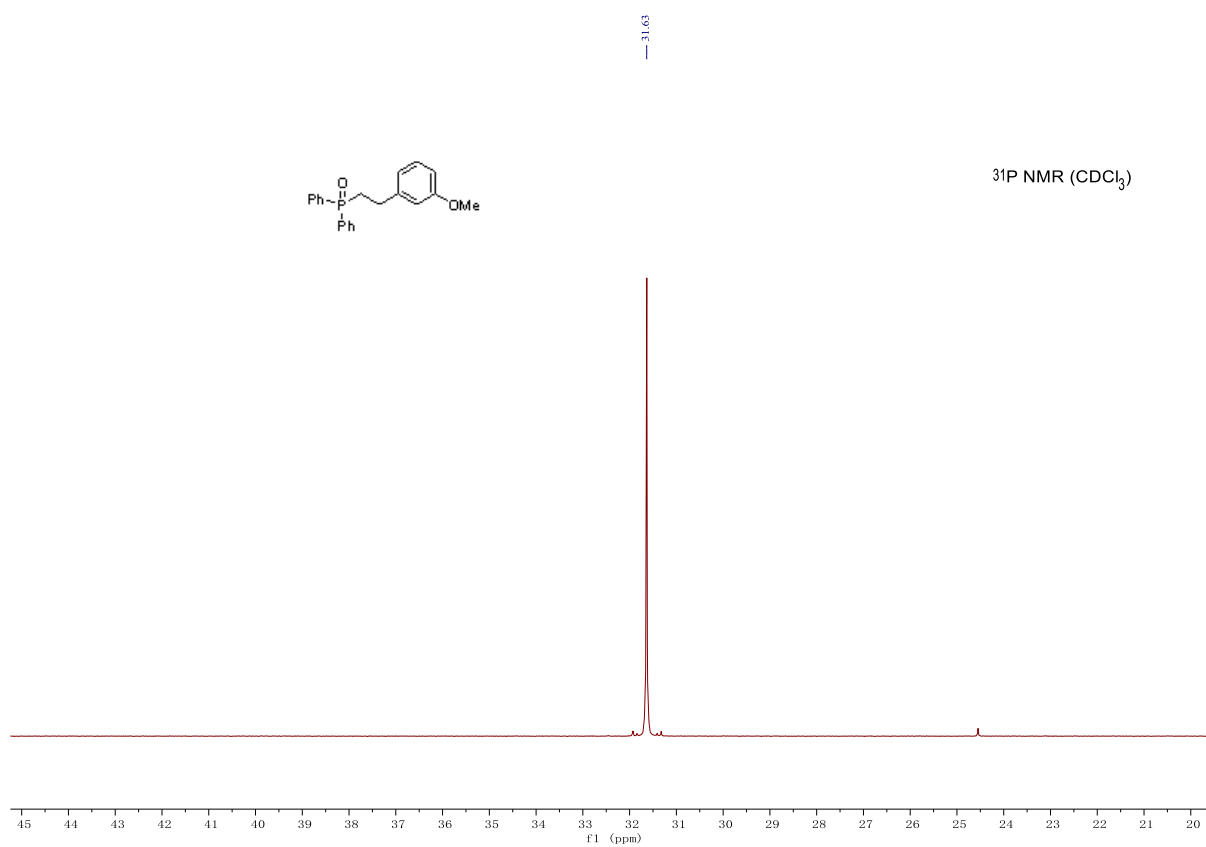

(8) (2-([1,1'-Biphenyl]-4-yl)ethyl)diphenylphosphine oxide (**3h**)

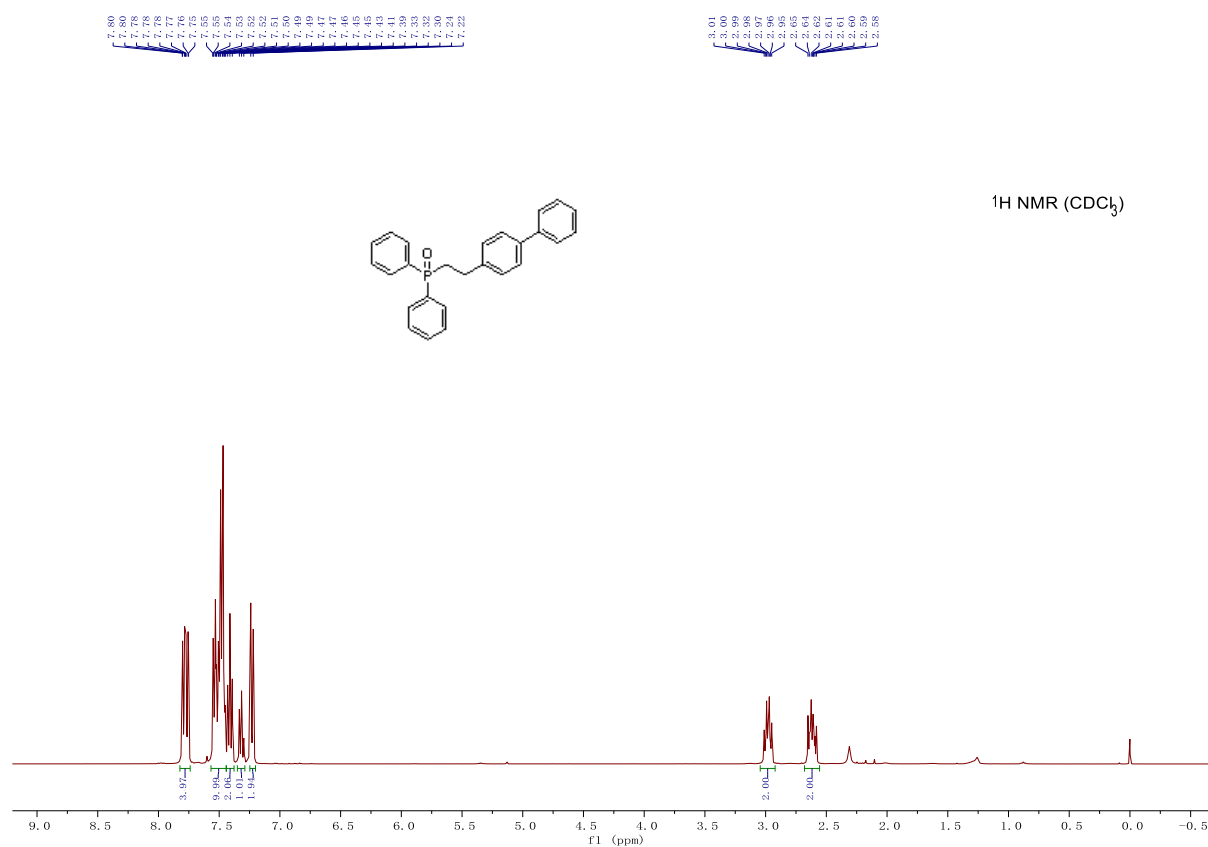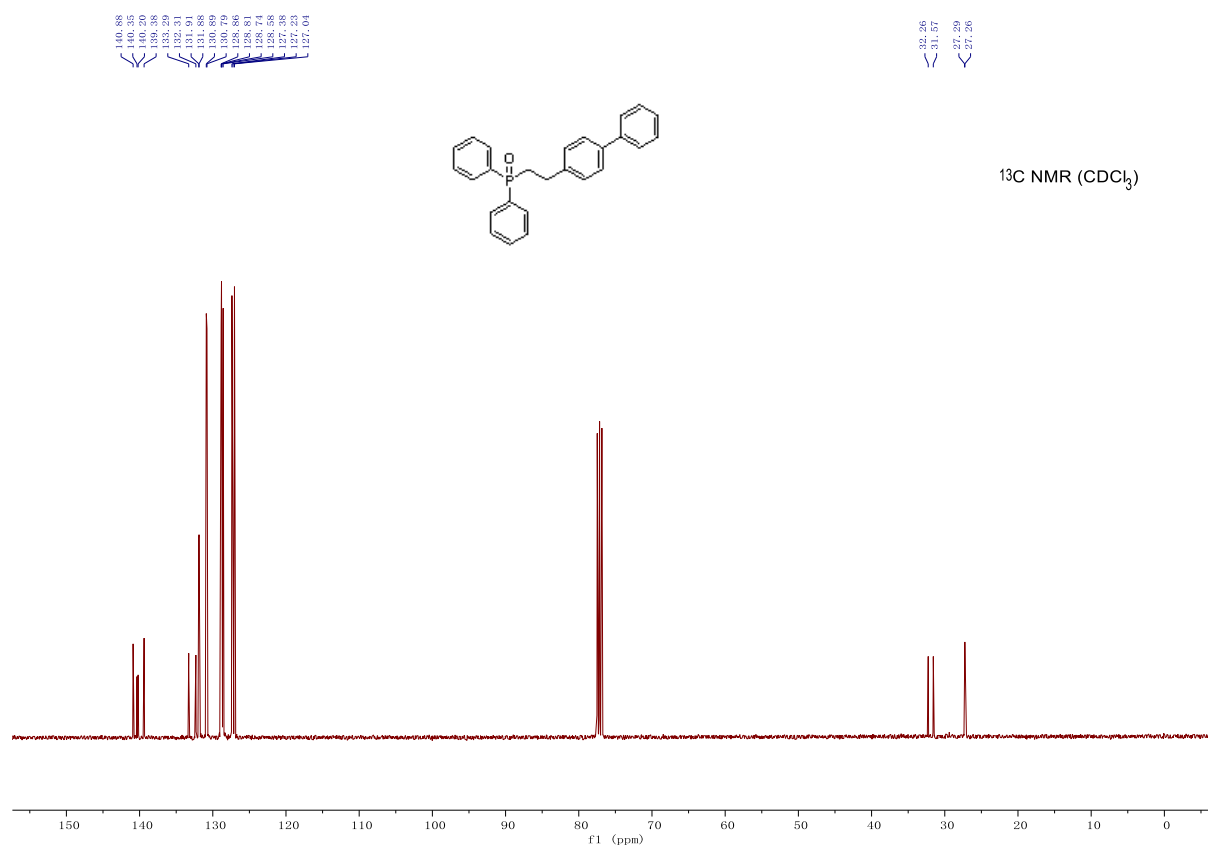



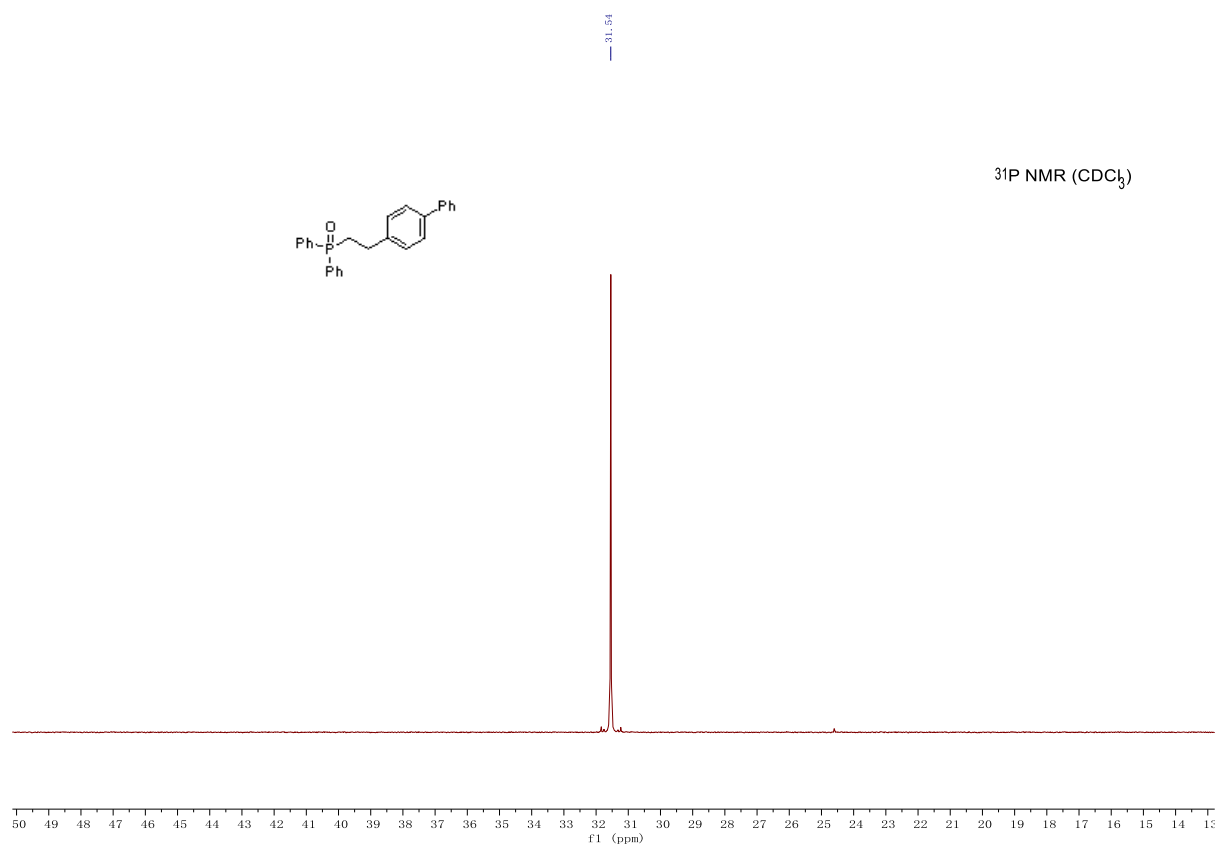

(9) (2-(Naphthalen-1-yl)ethyl)diphenylphosphine oxide (**3i**)

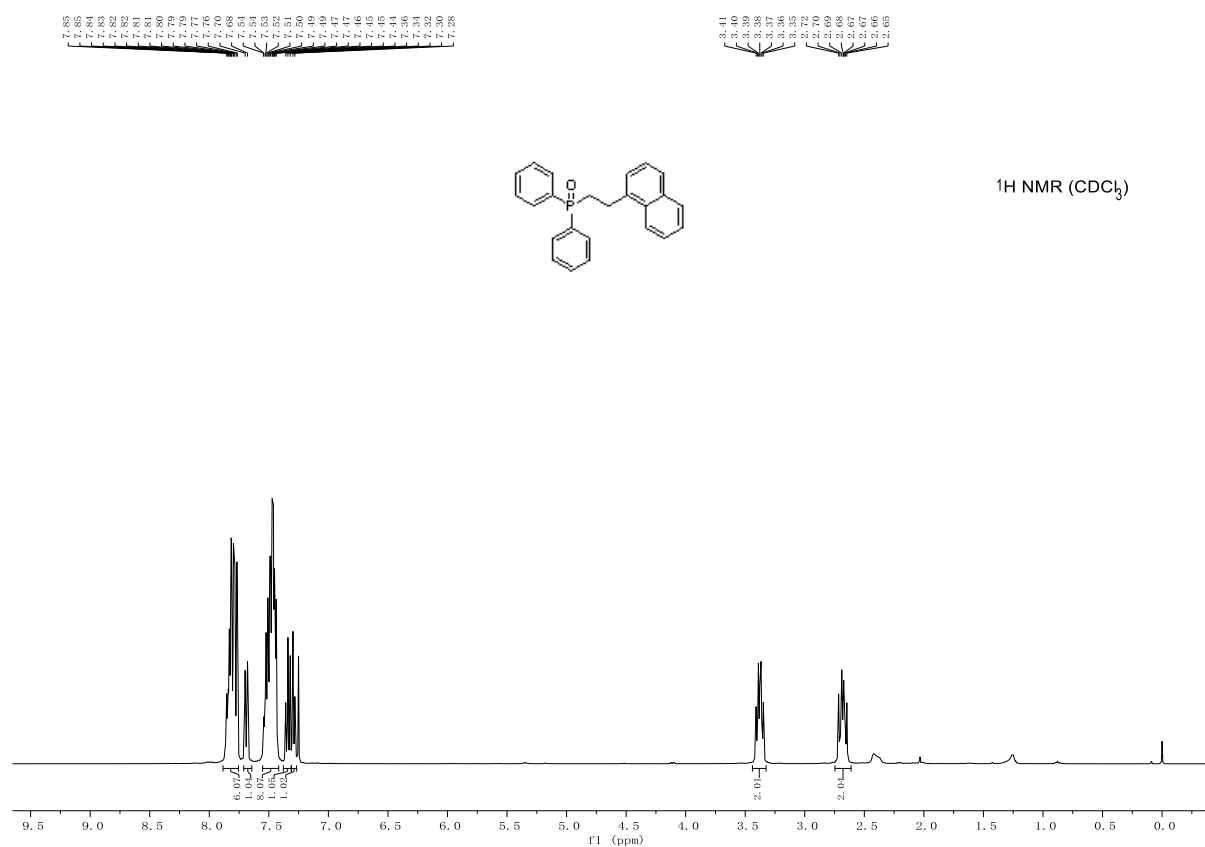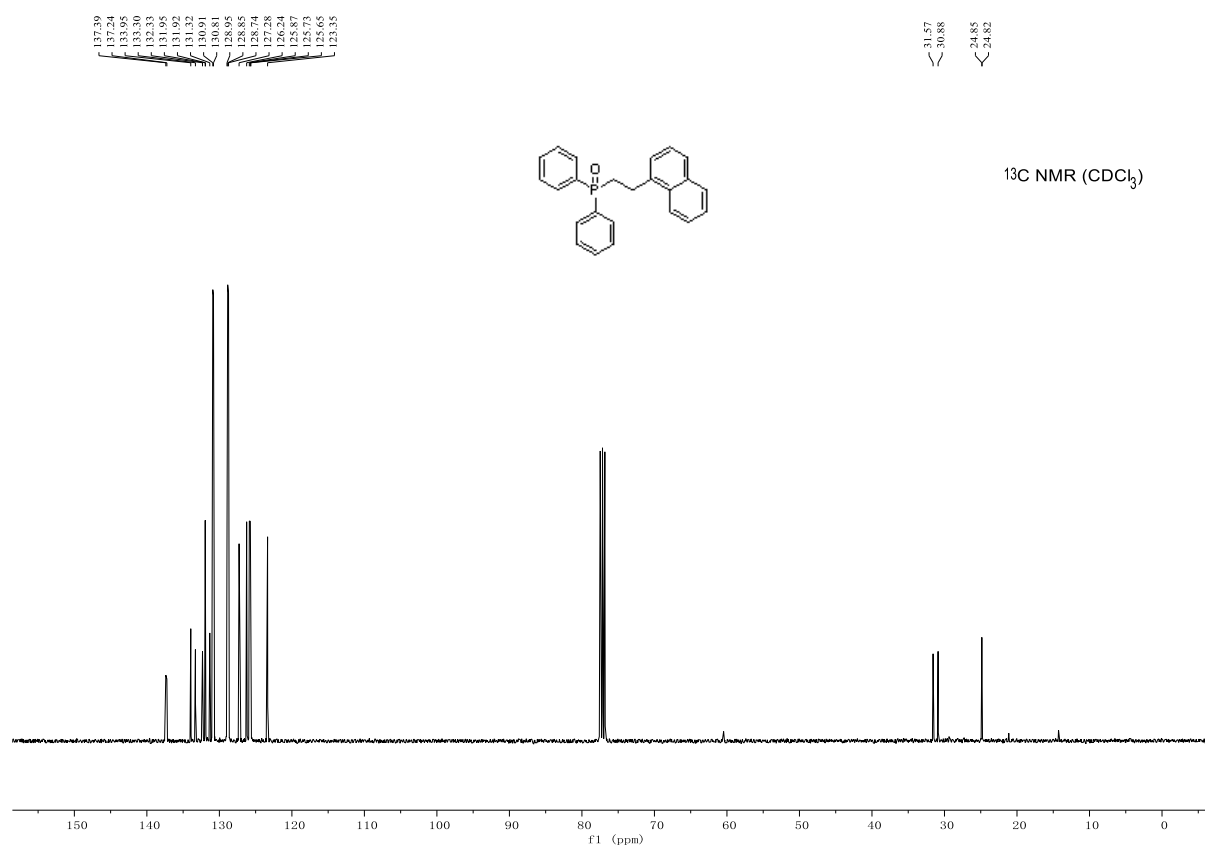

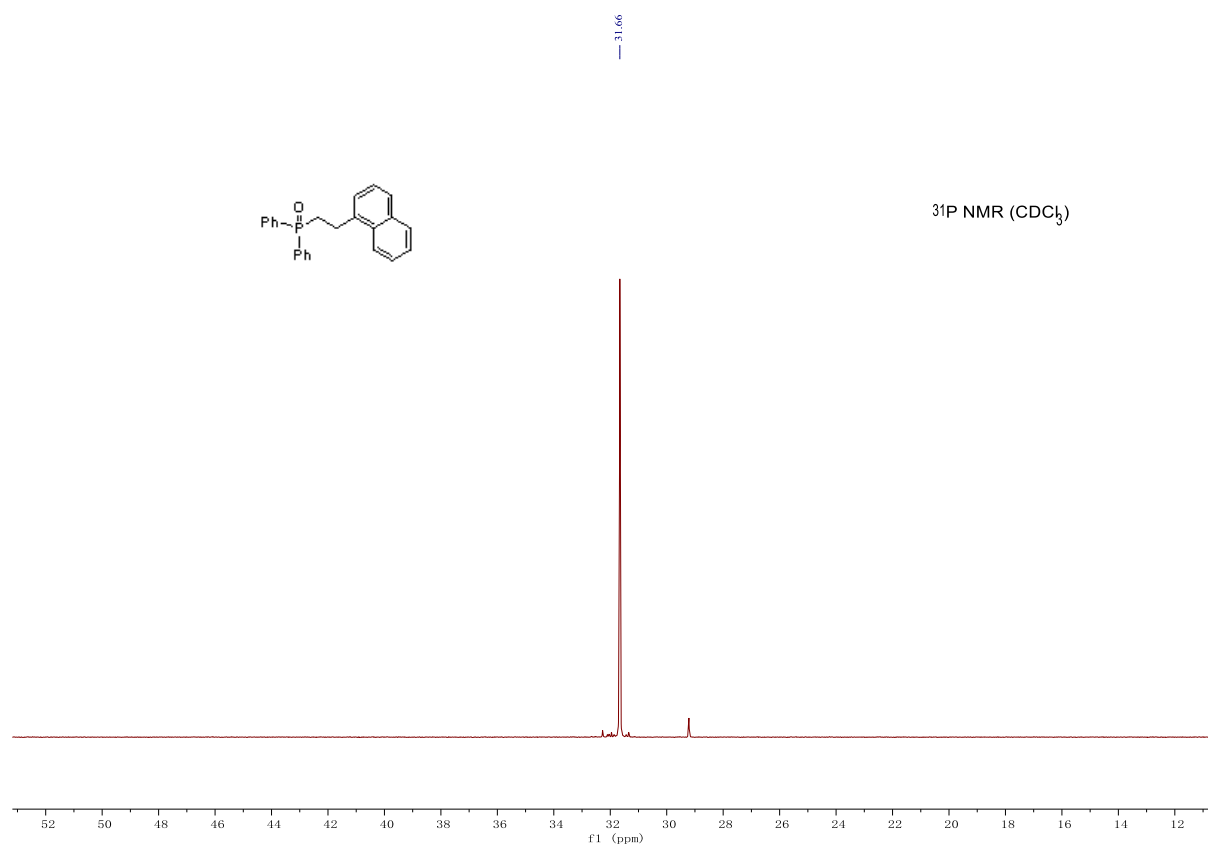

(10) (2-(Naphthalen-2-yl)ethyl)diphenylphosphine oxide (**3j**)

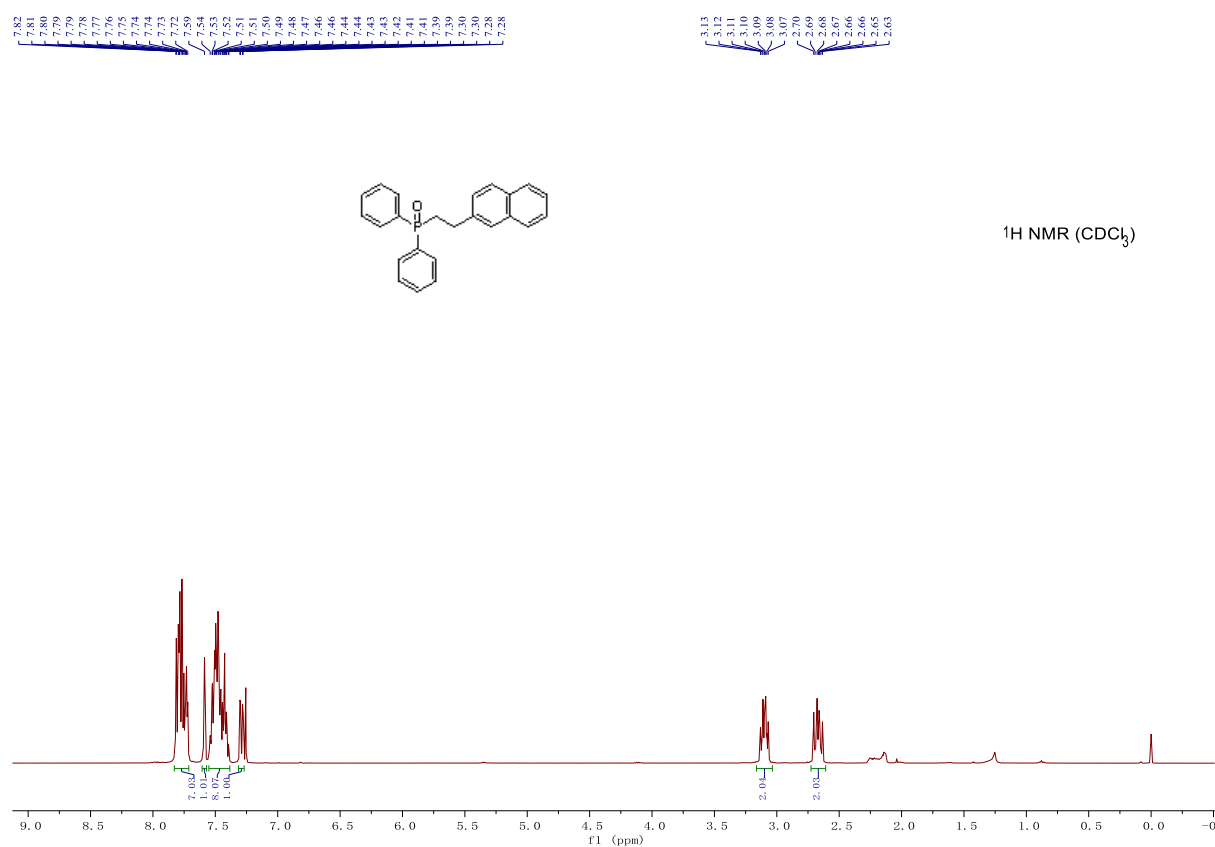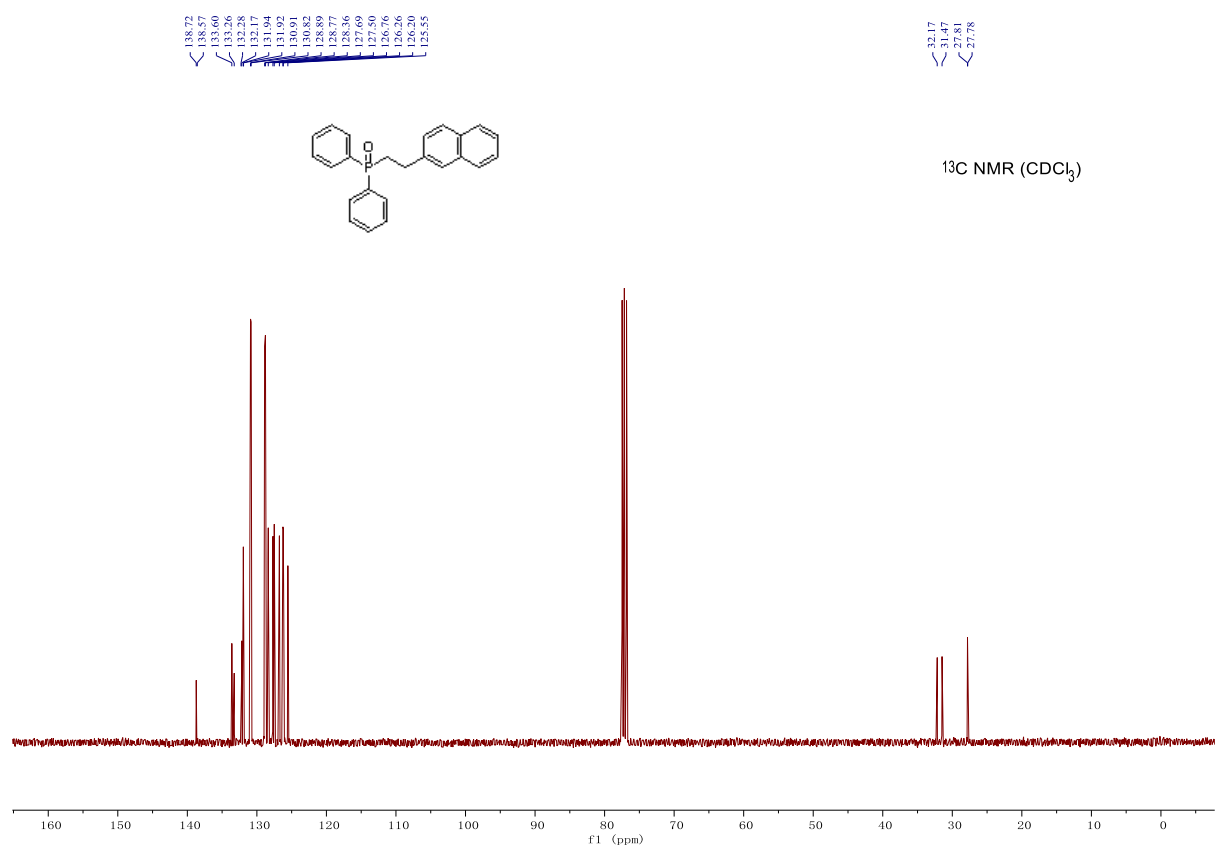

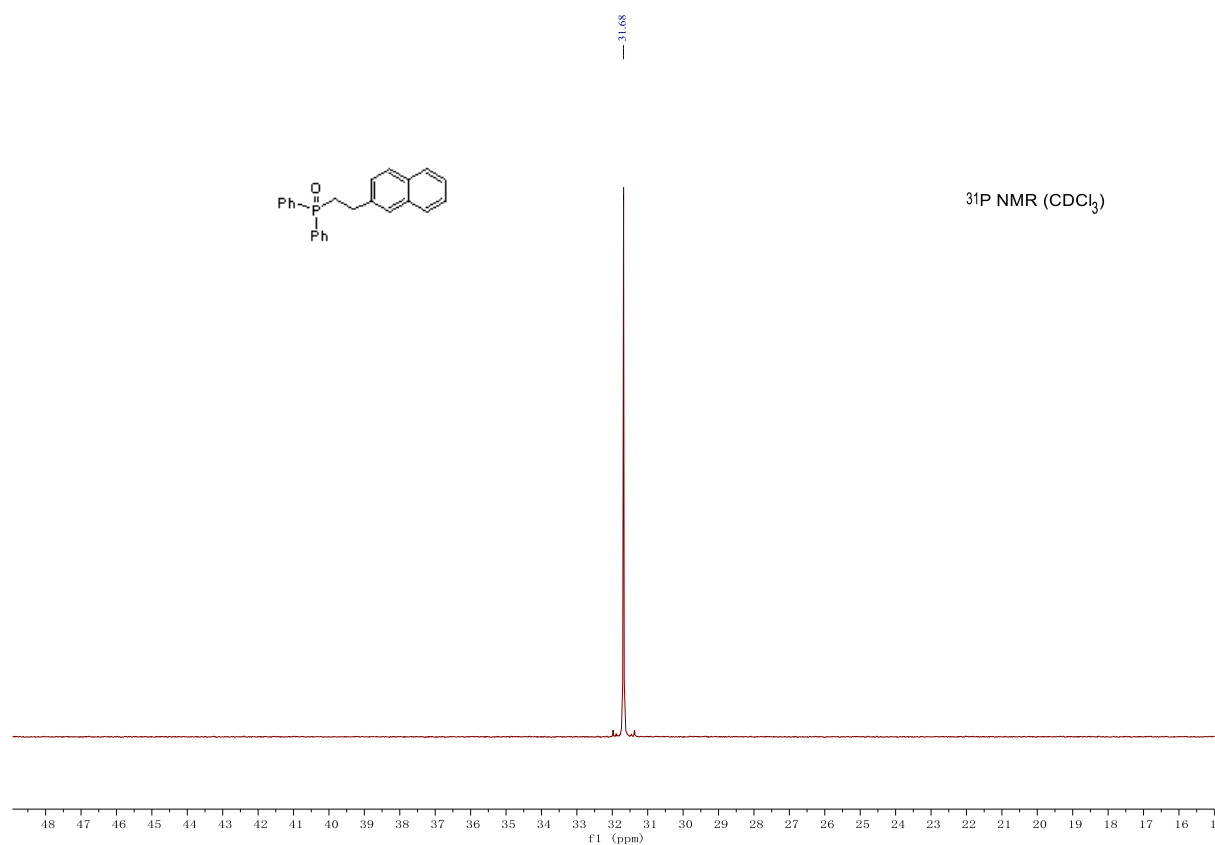

(11) (4-Chlorophenethyl)diphenylphosphine oxide (**3k**)

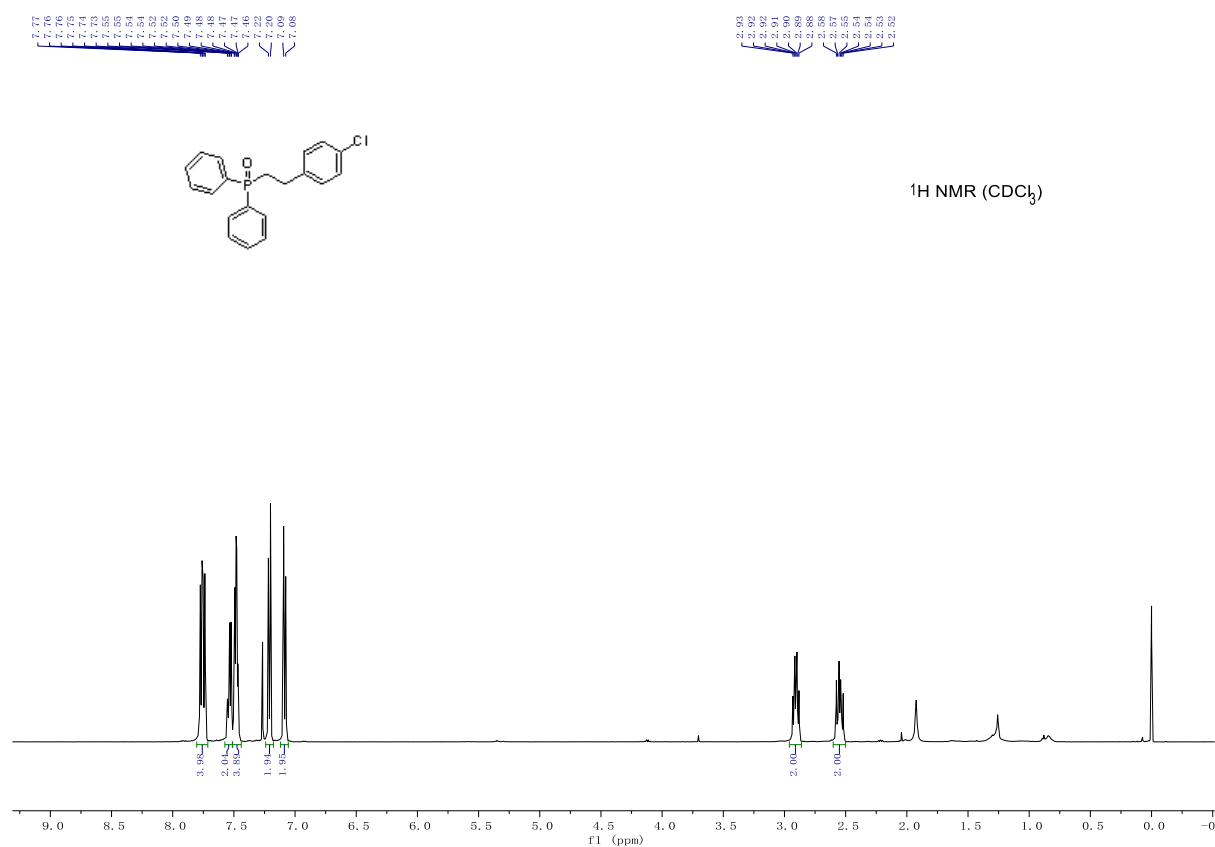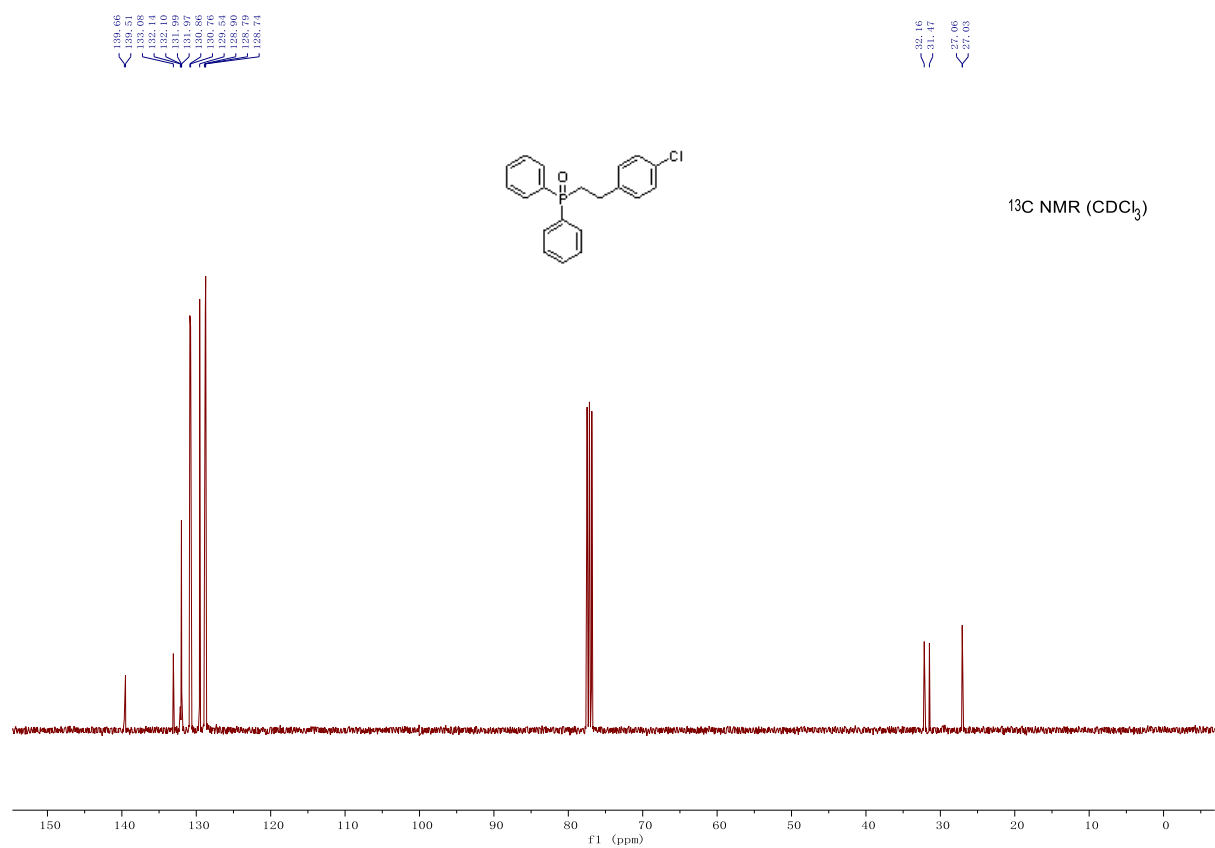

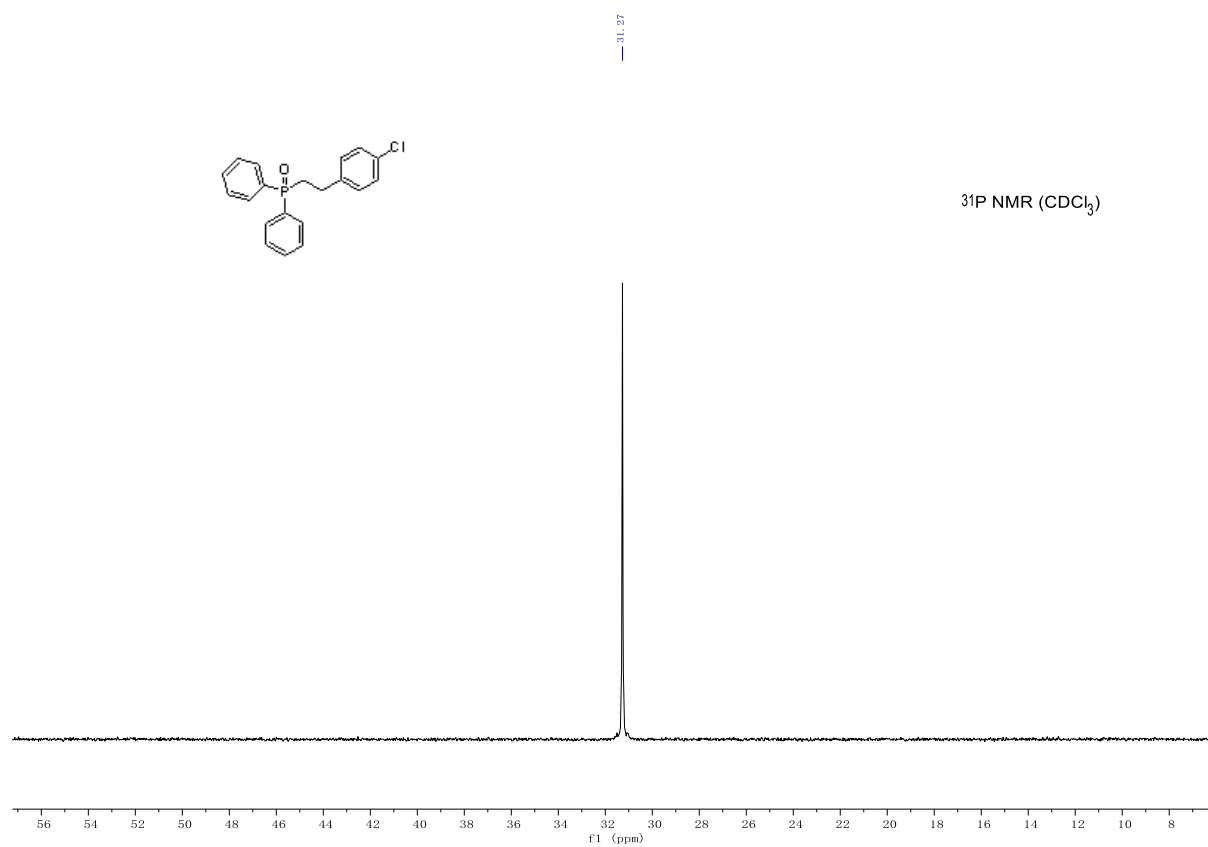

(12) (2-Chlorophenethyl)diphenylphosphine oxide (**3I**)

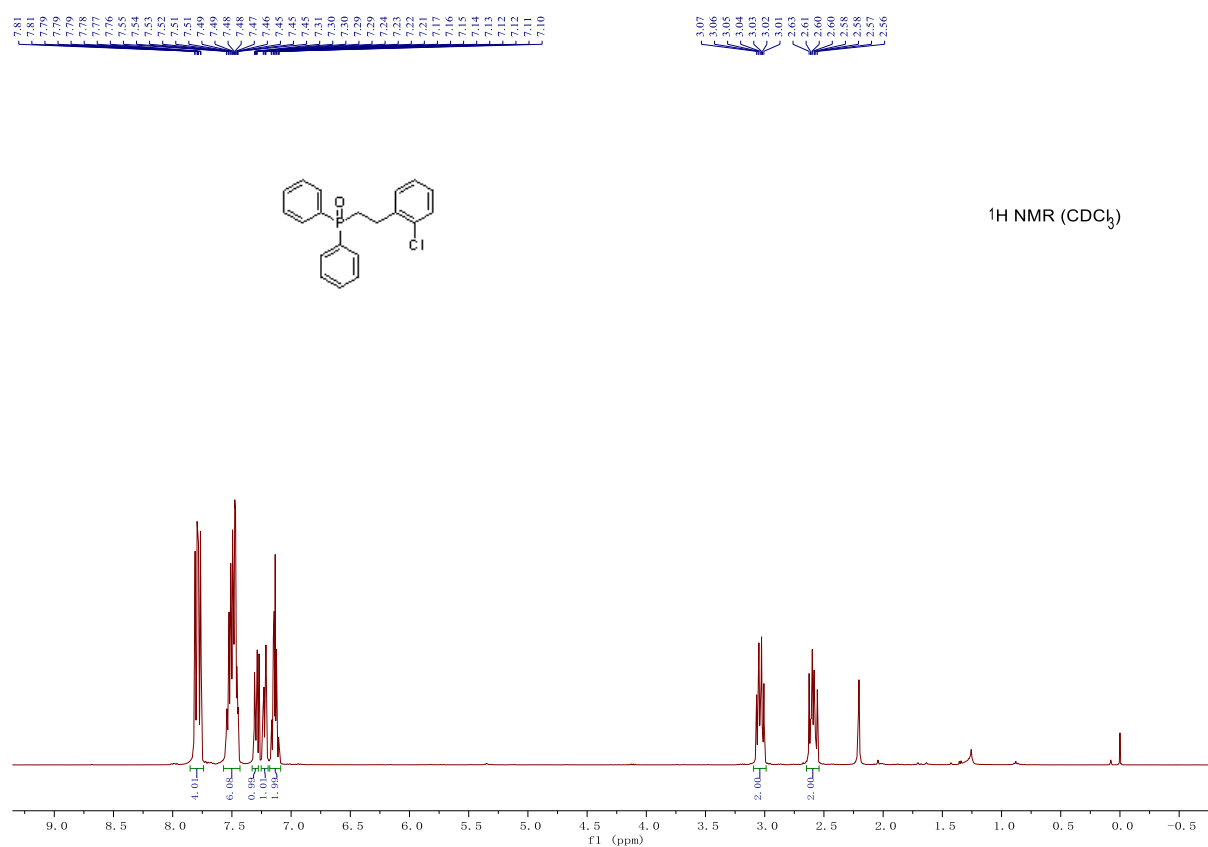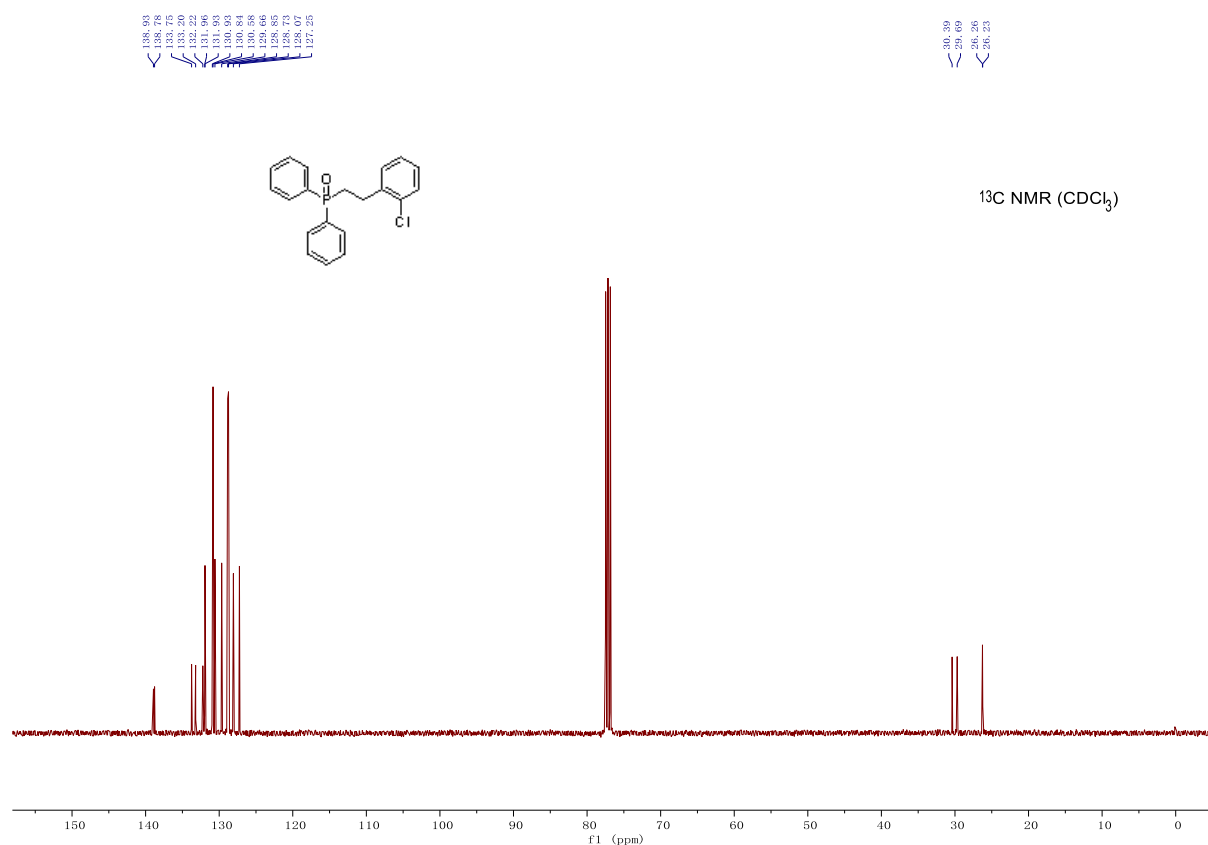



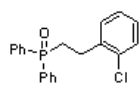

$^{31}\text{P}$  NMR ( $\text{CDCl}_3$ )

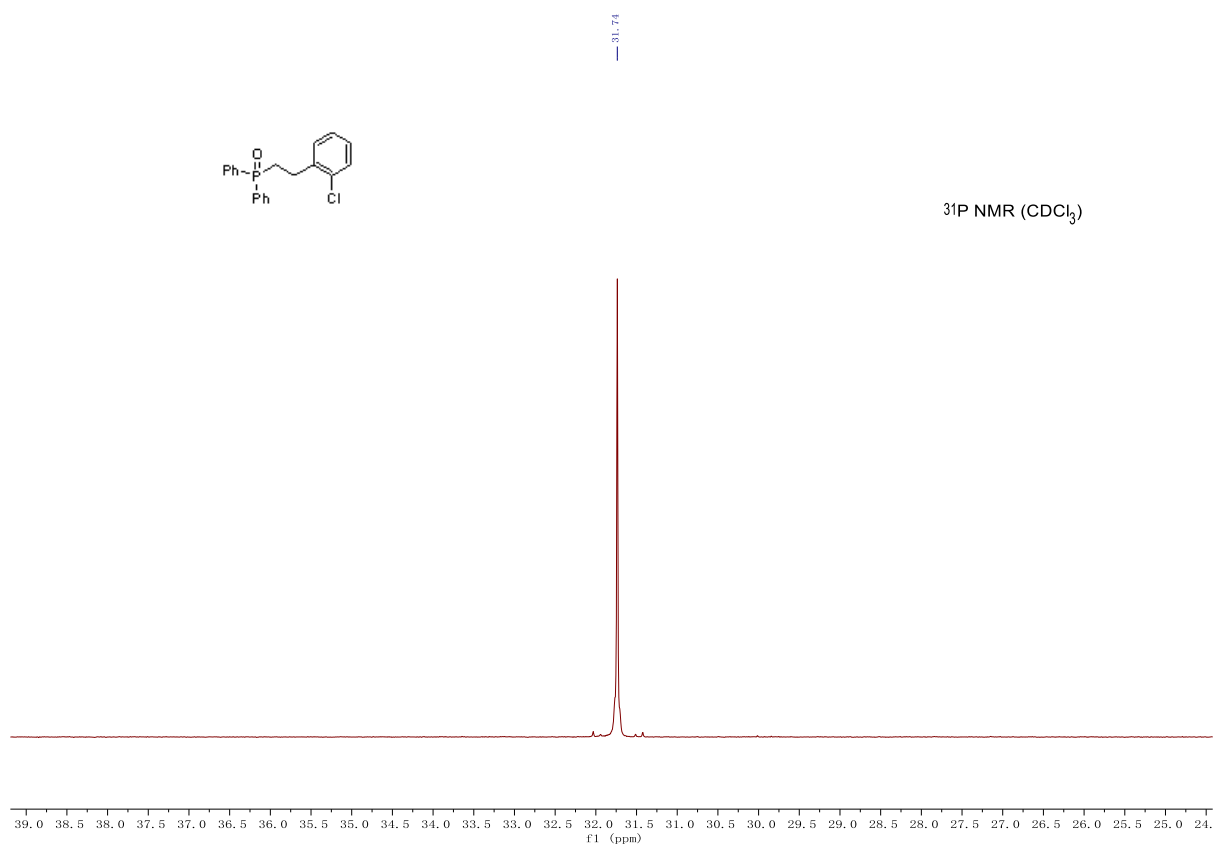

(13) (2-Fluorophenethyl)diphenylphosphine oxide (**3m**)

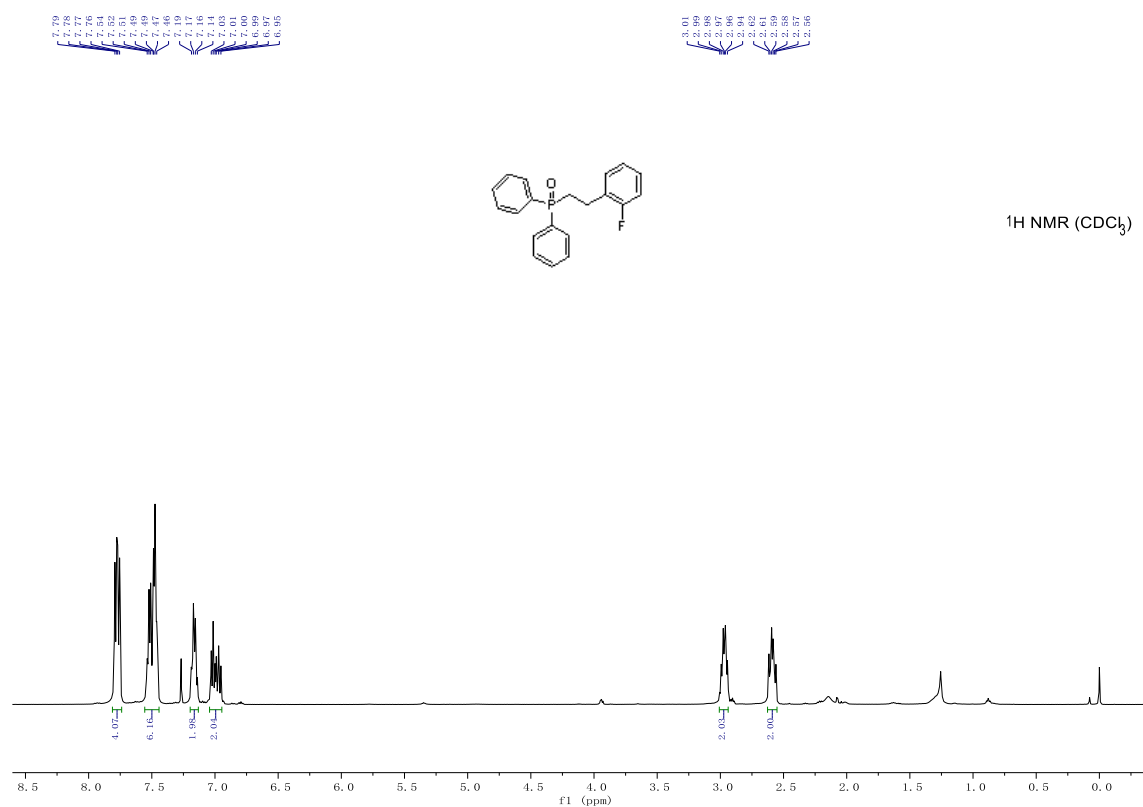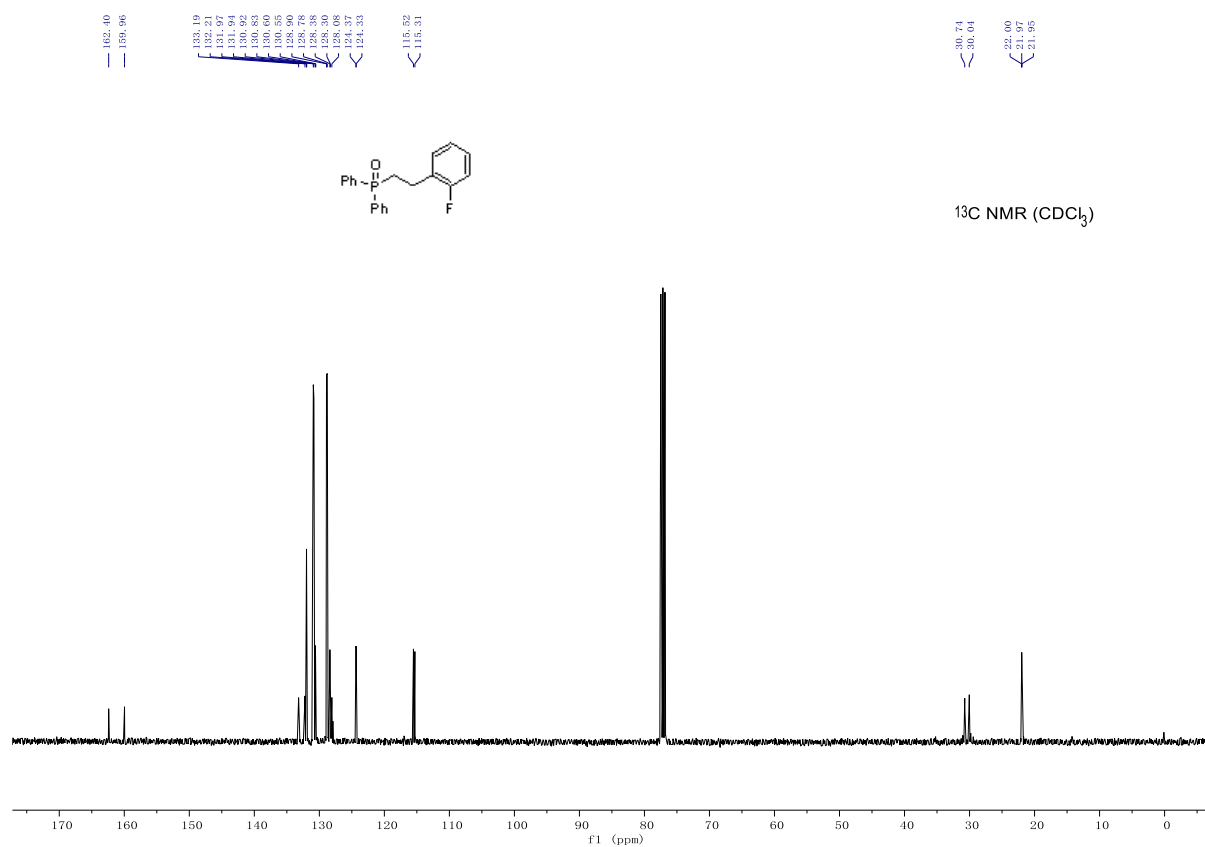

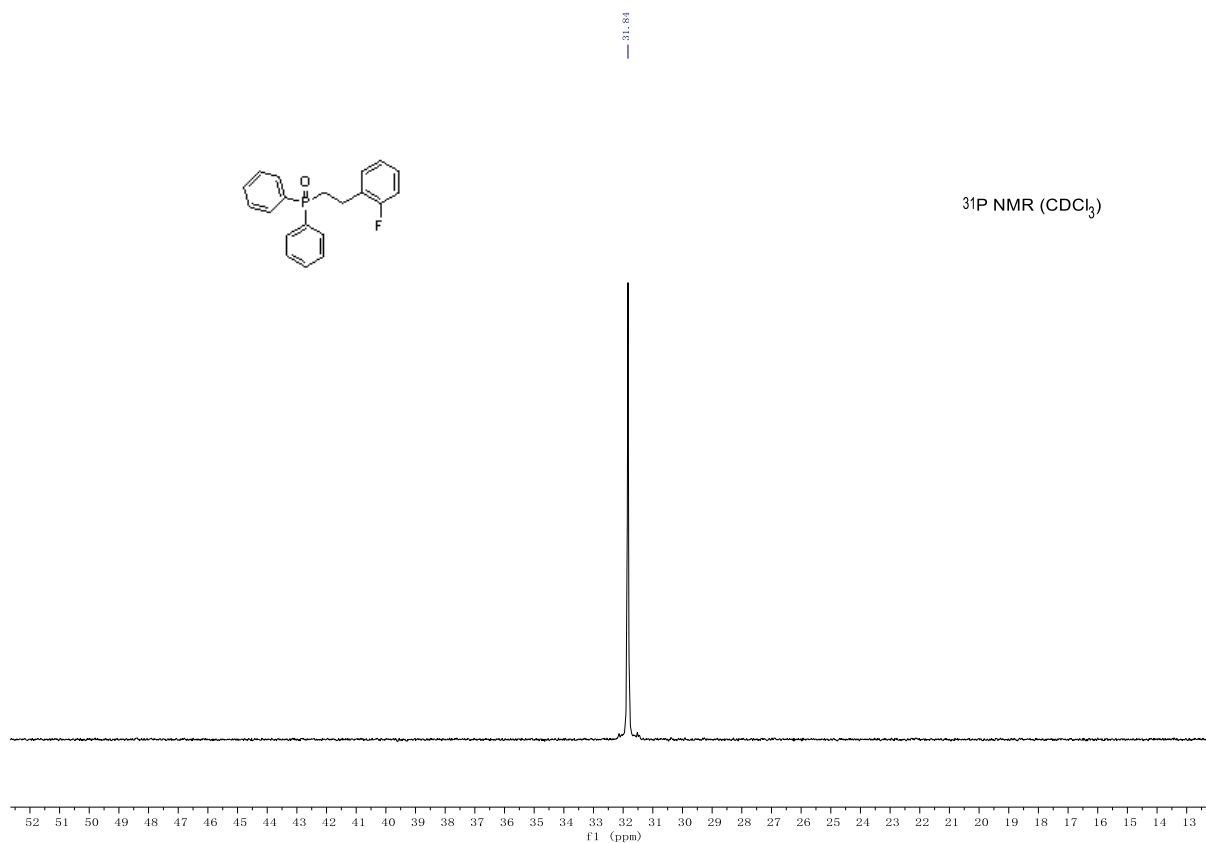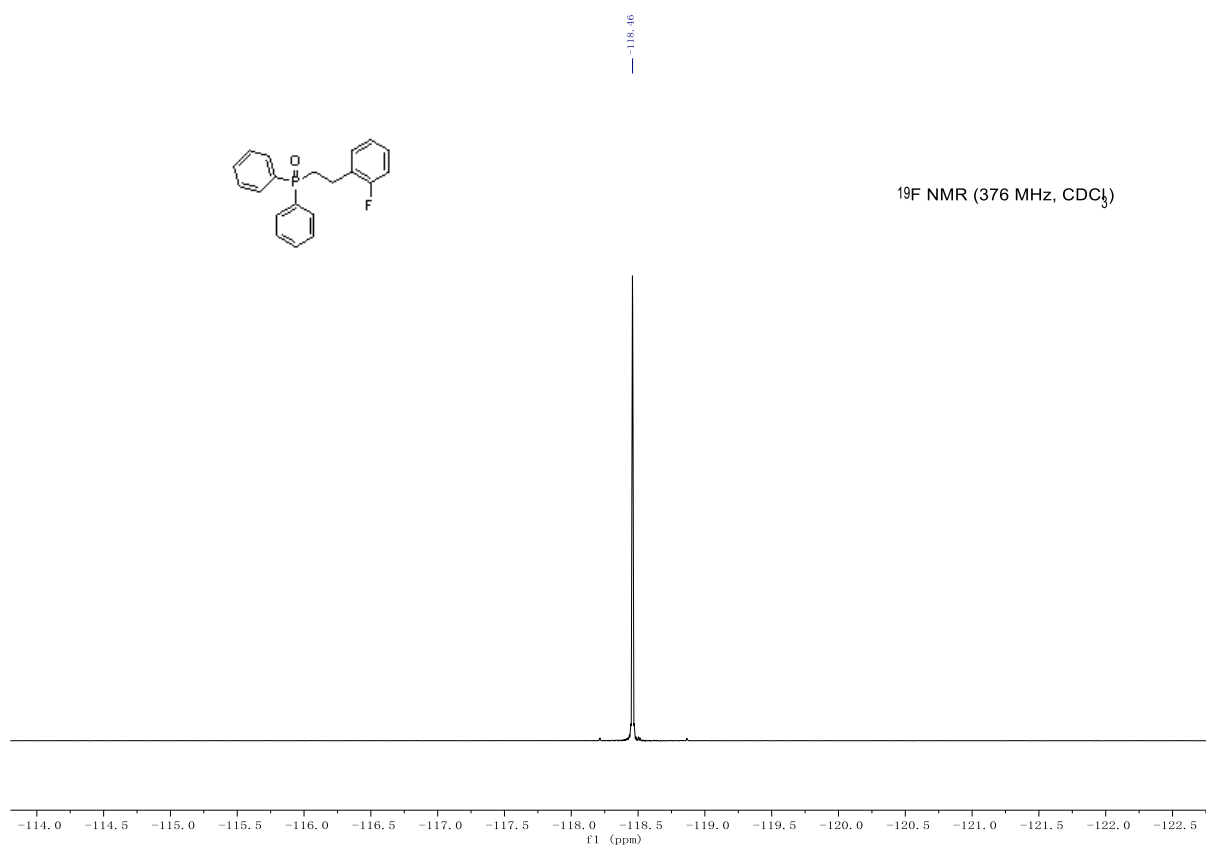

(14) Diphenyl(4-(trifluoromethyl)phenethyl)phosphine oxide (**3n**)

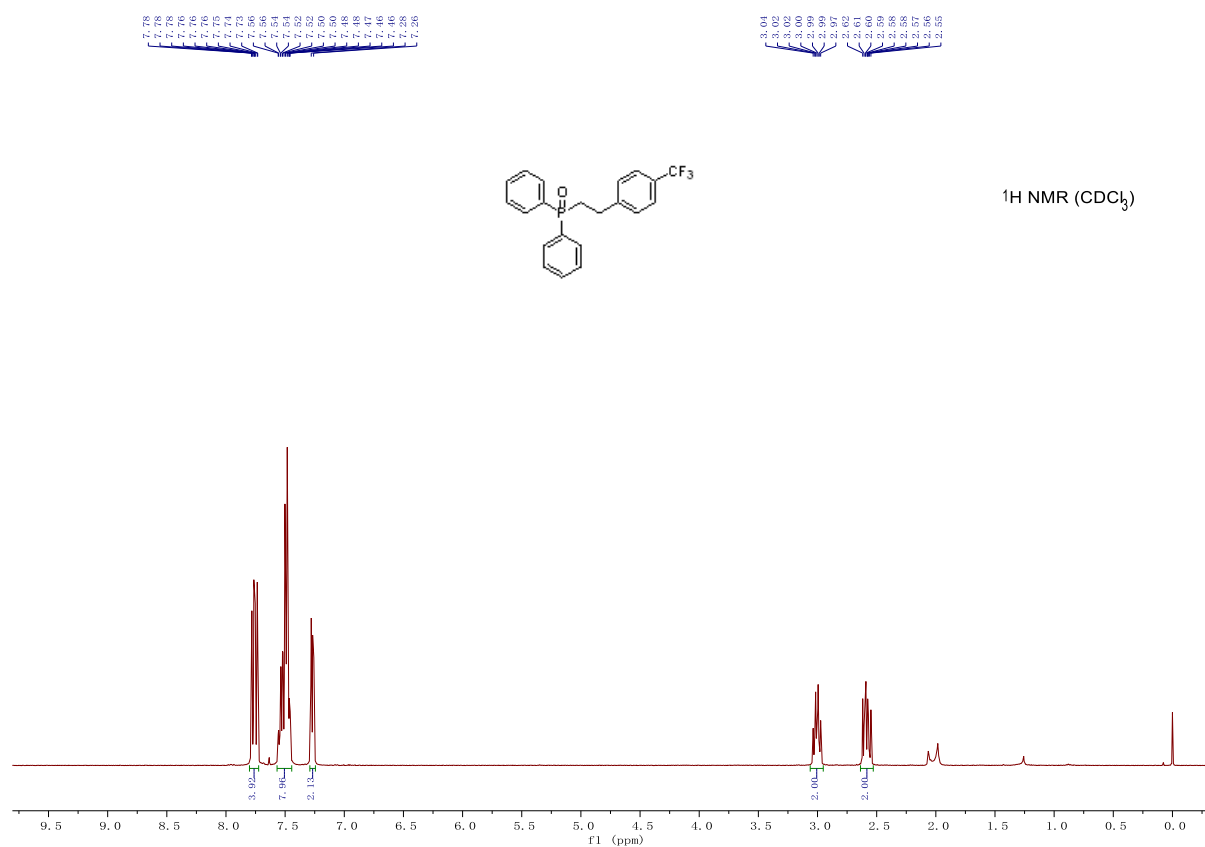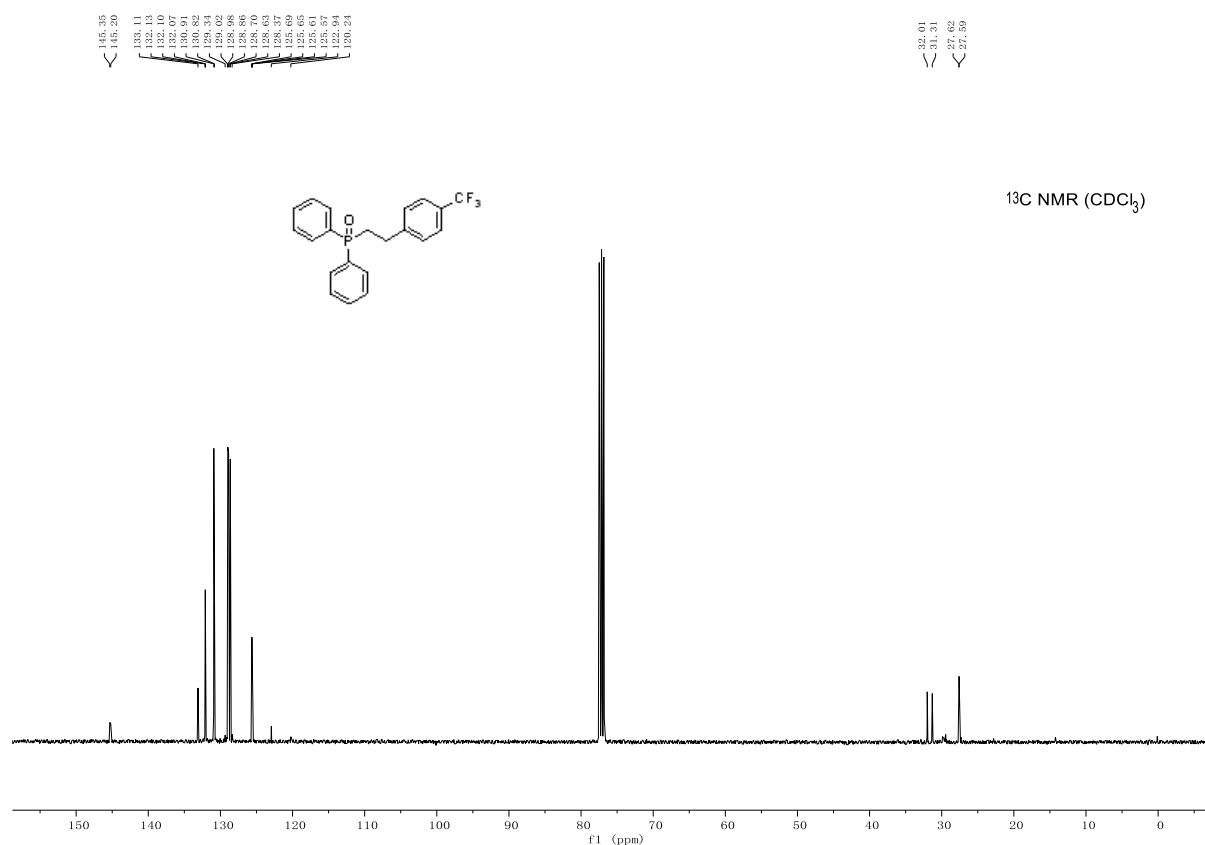

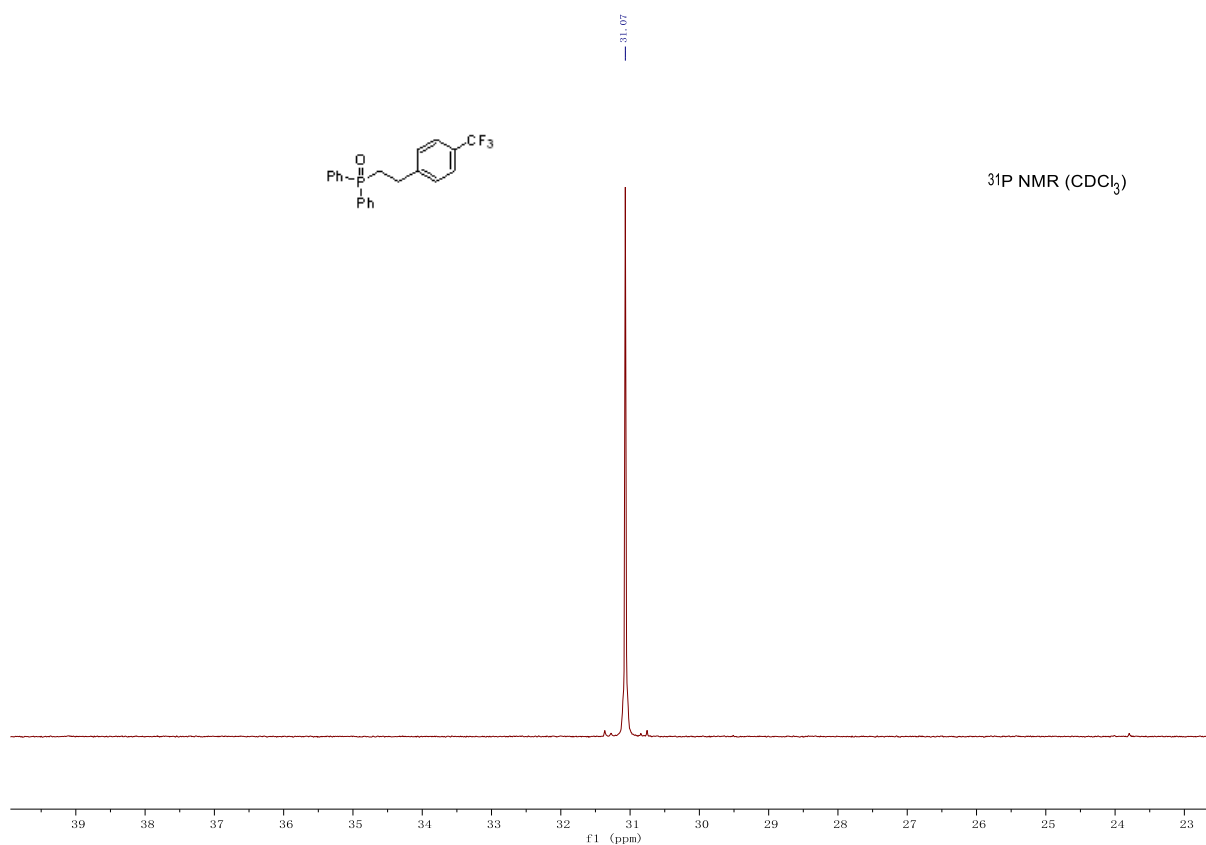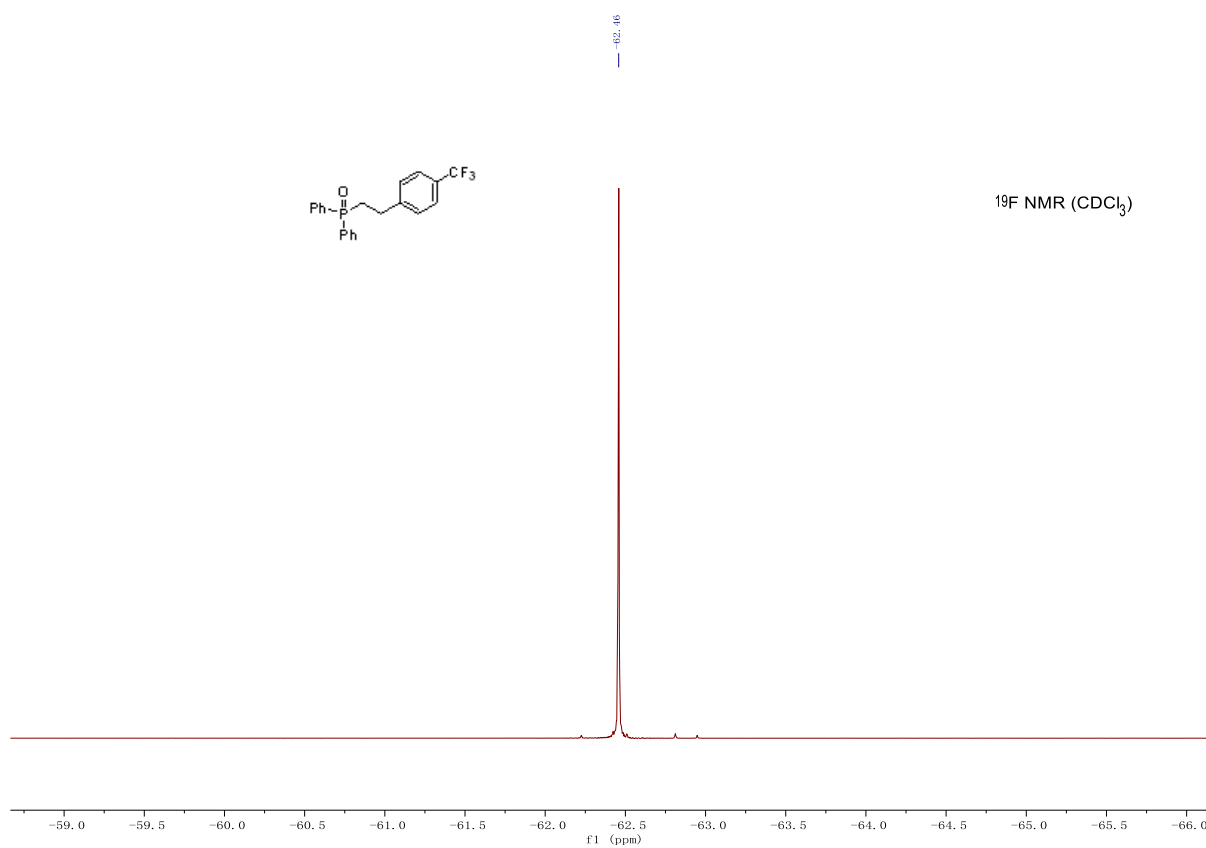

(15) (2-(Furan-2-yl)ethyl)diphenylphosphine oxide (**30**)

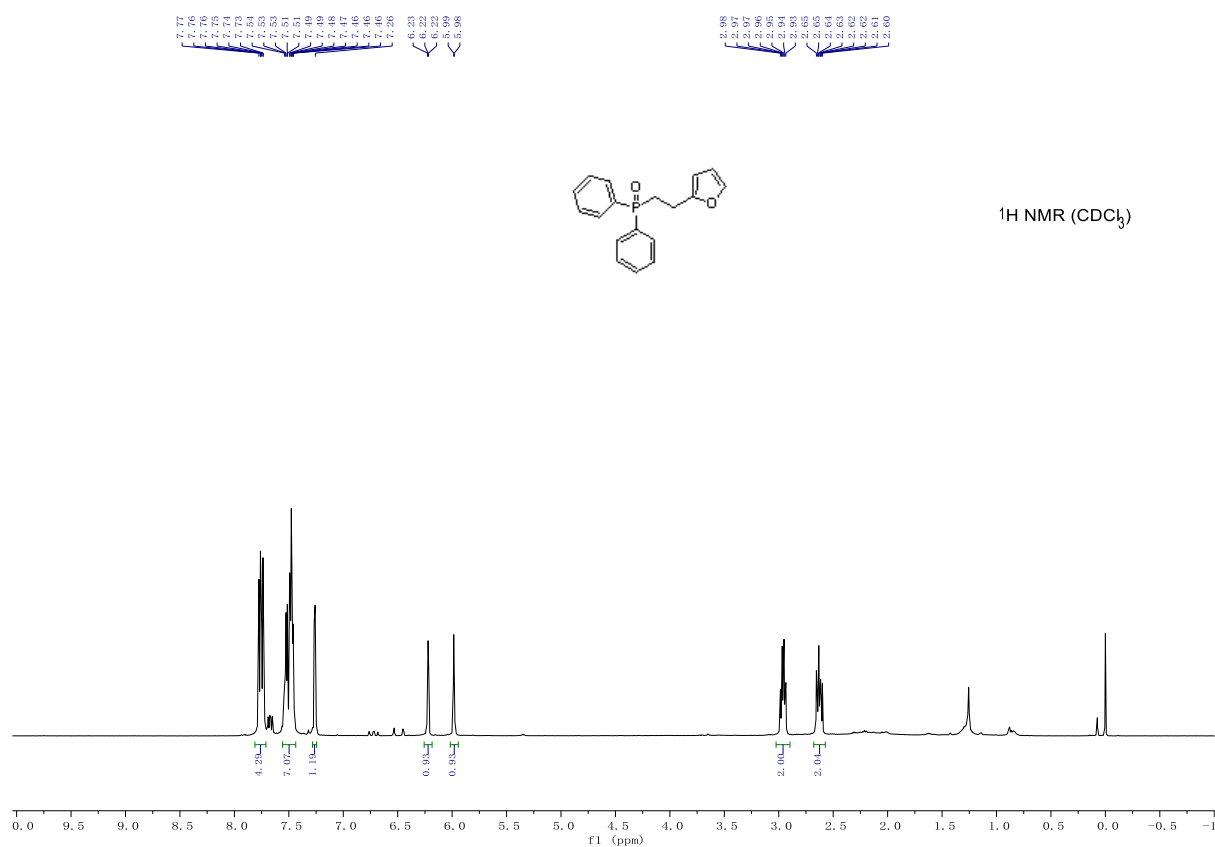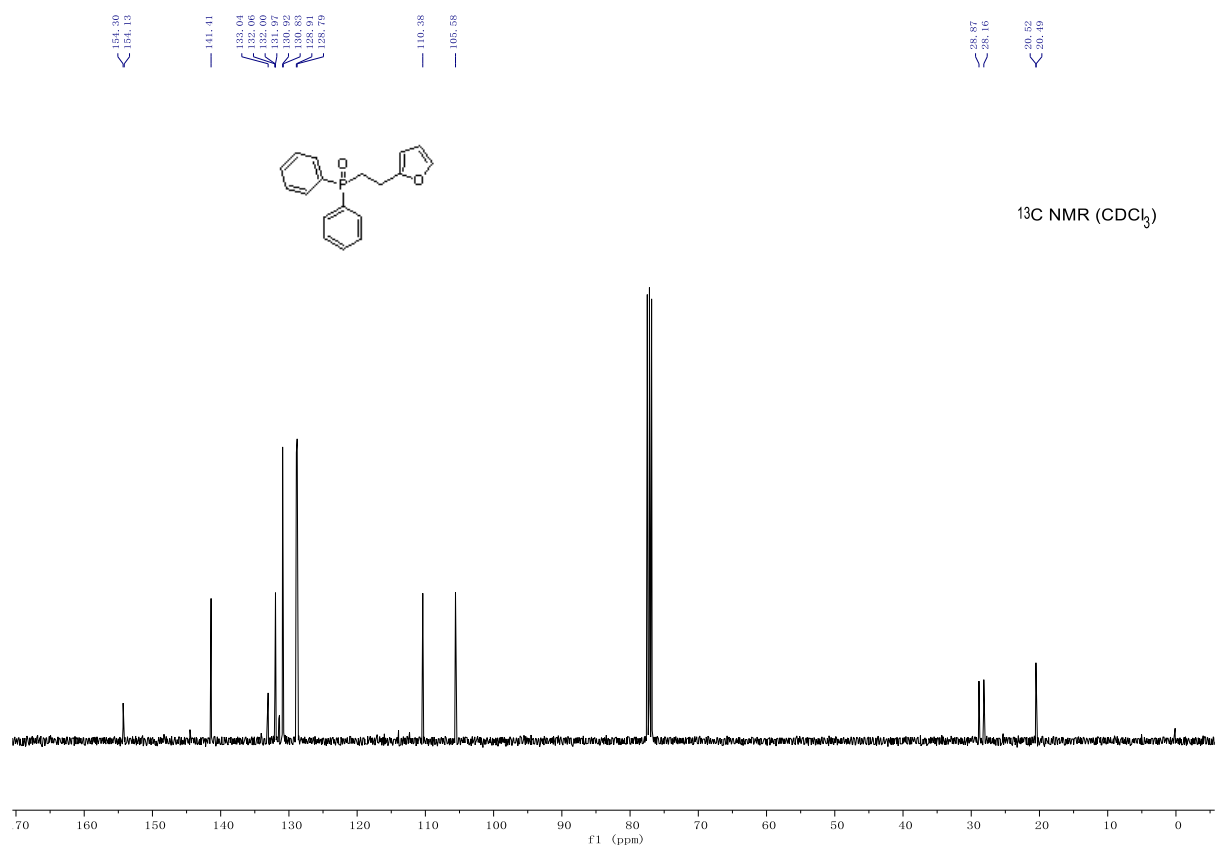

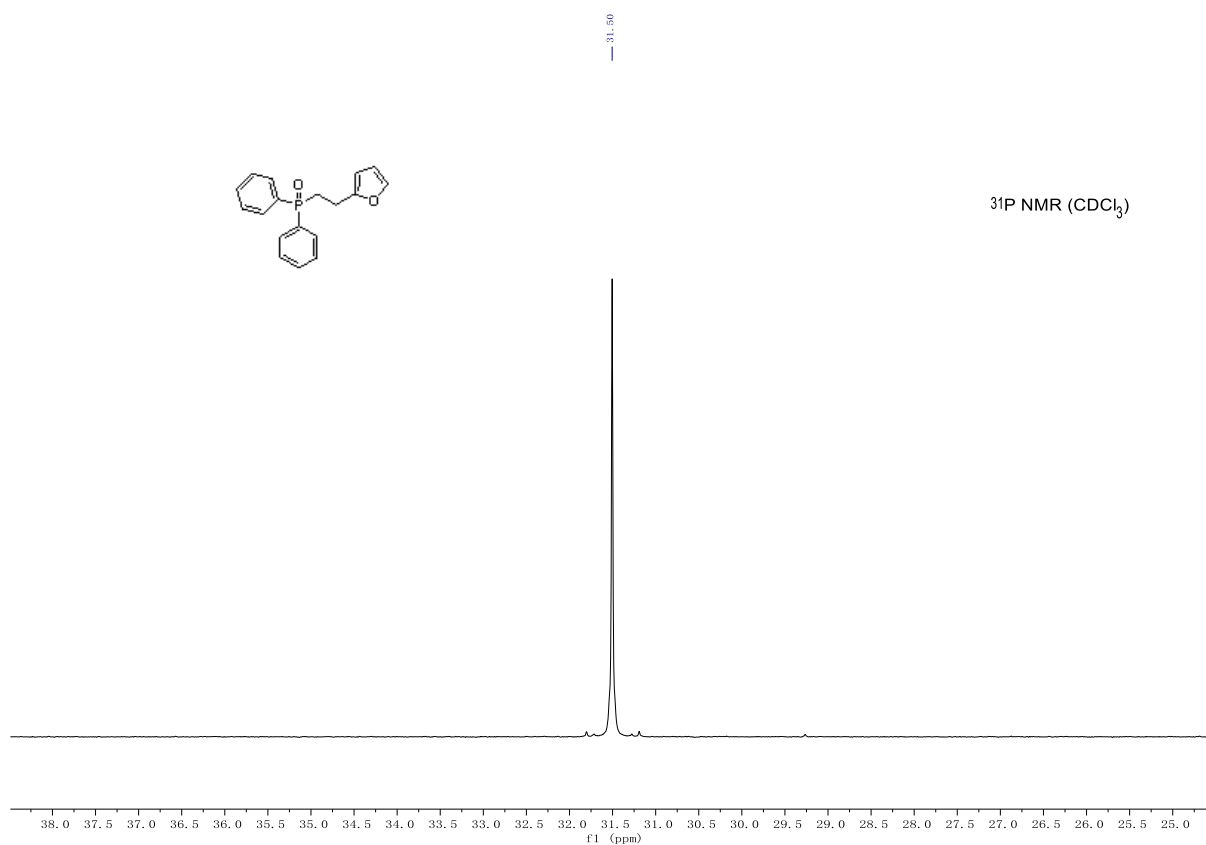

(16) Diphenyl(2-(thiophen-2-yl)ethyl)phosphine oxide (**3p**)

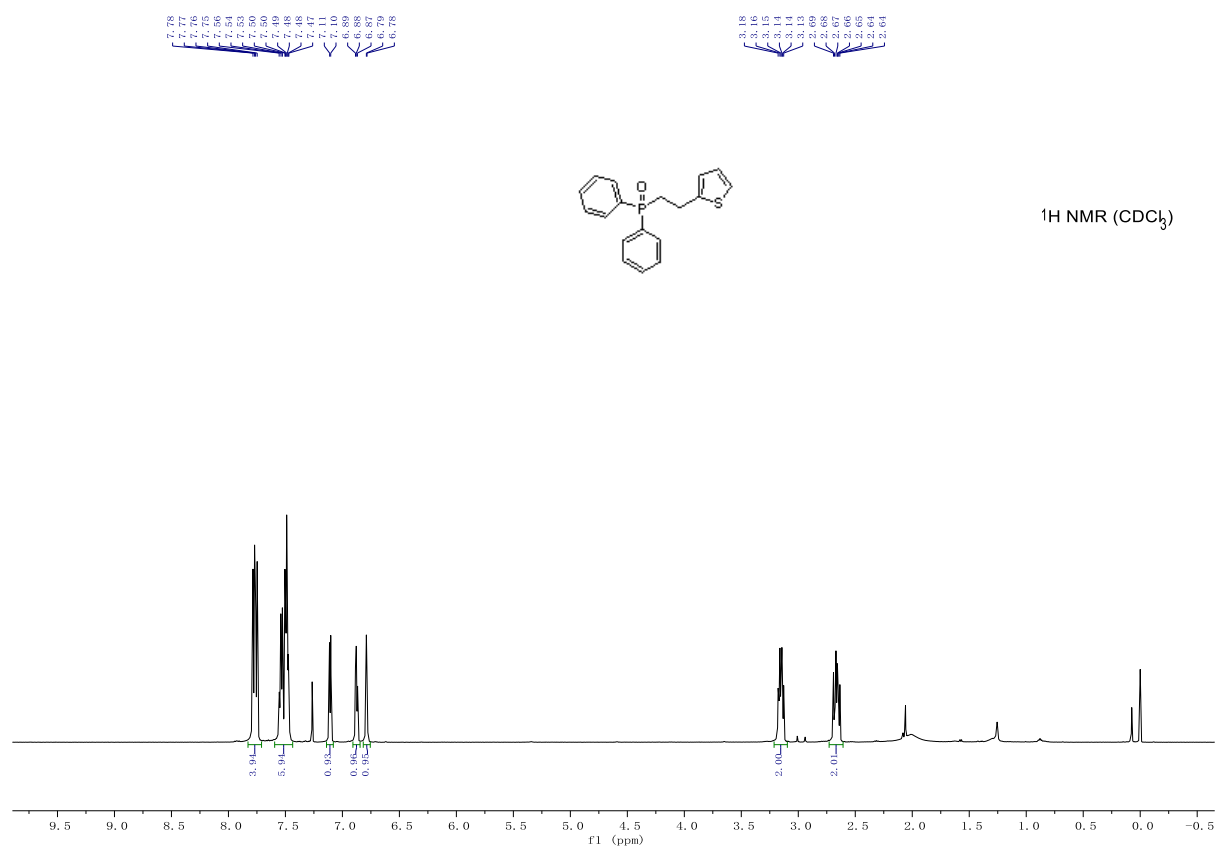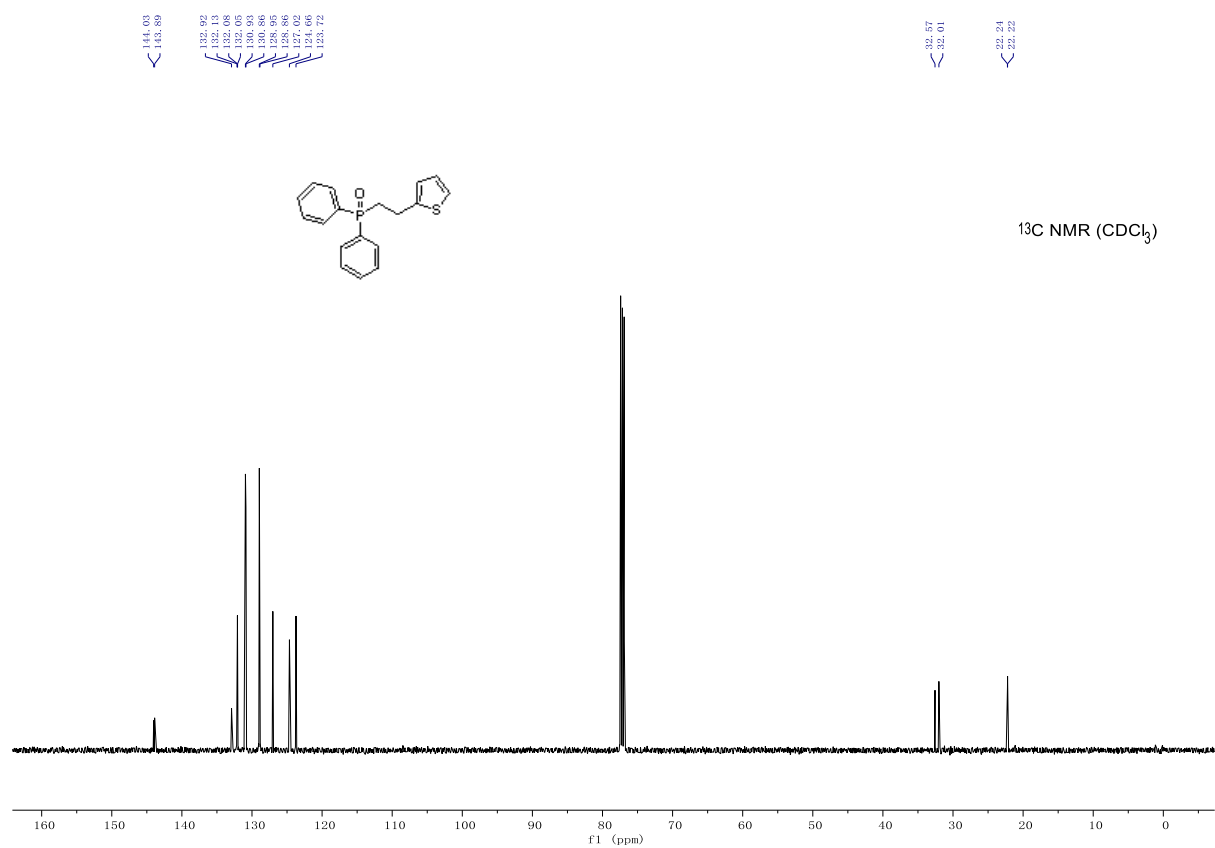



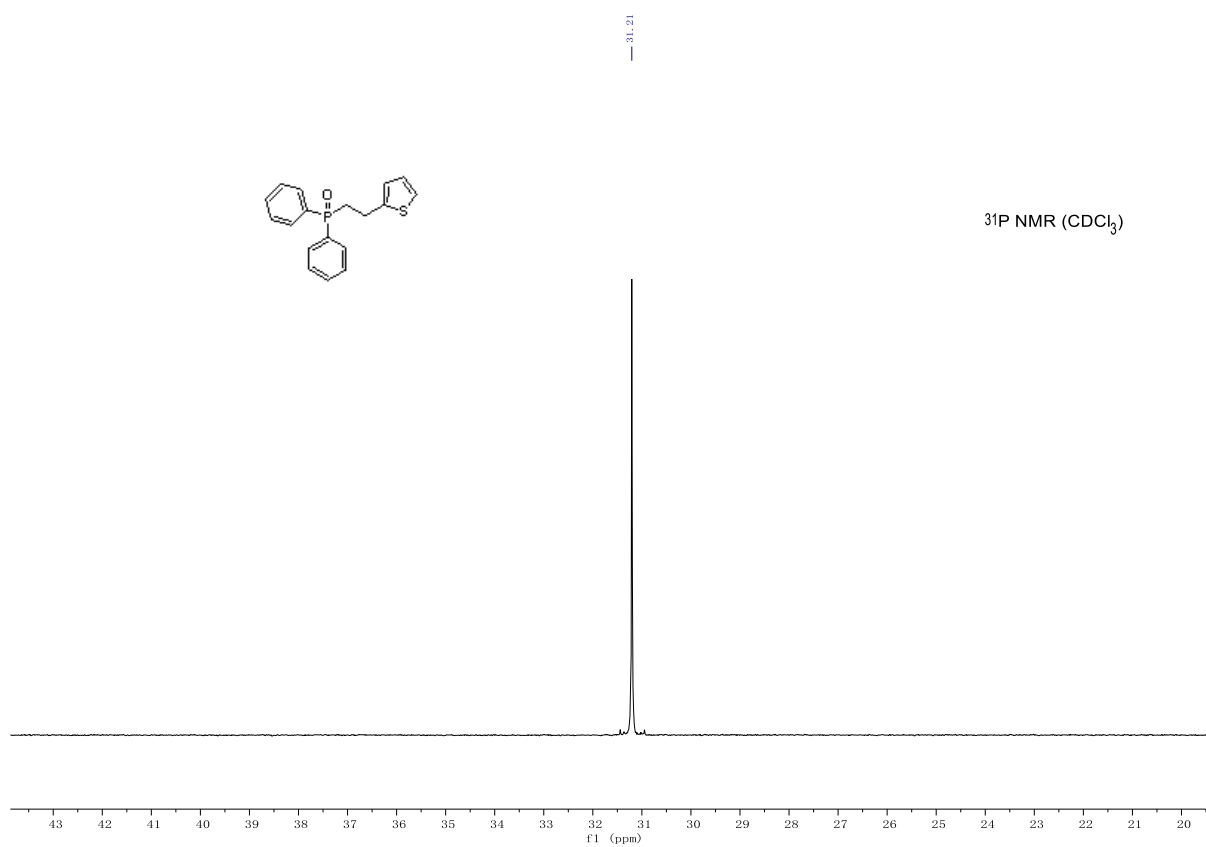

(17) 2-(2-Diphenylphosphorylethyl)benzothiophene (**3q**)

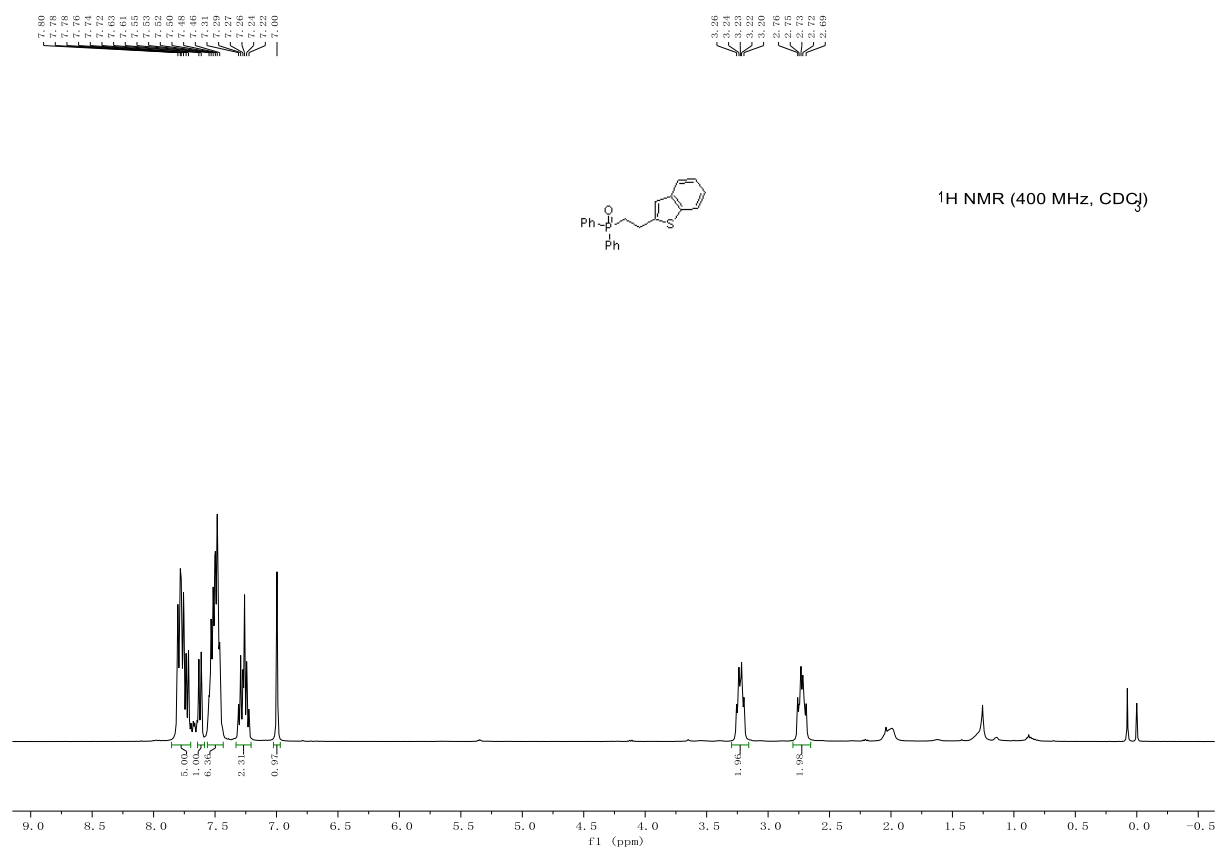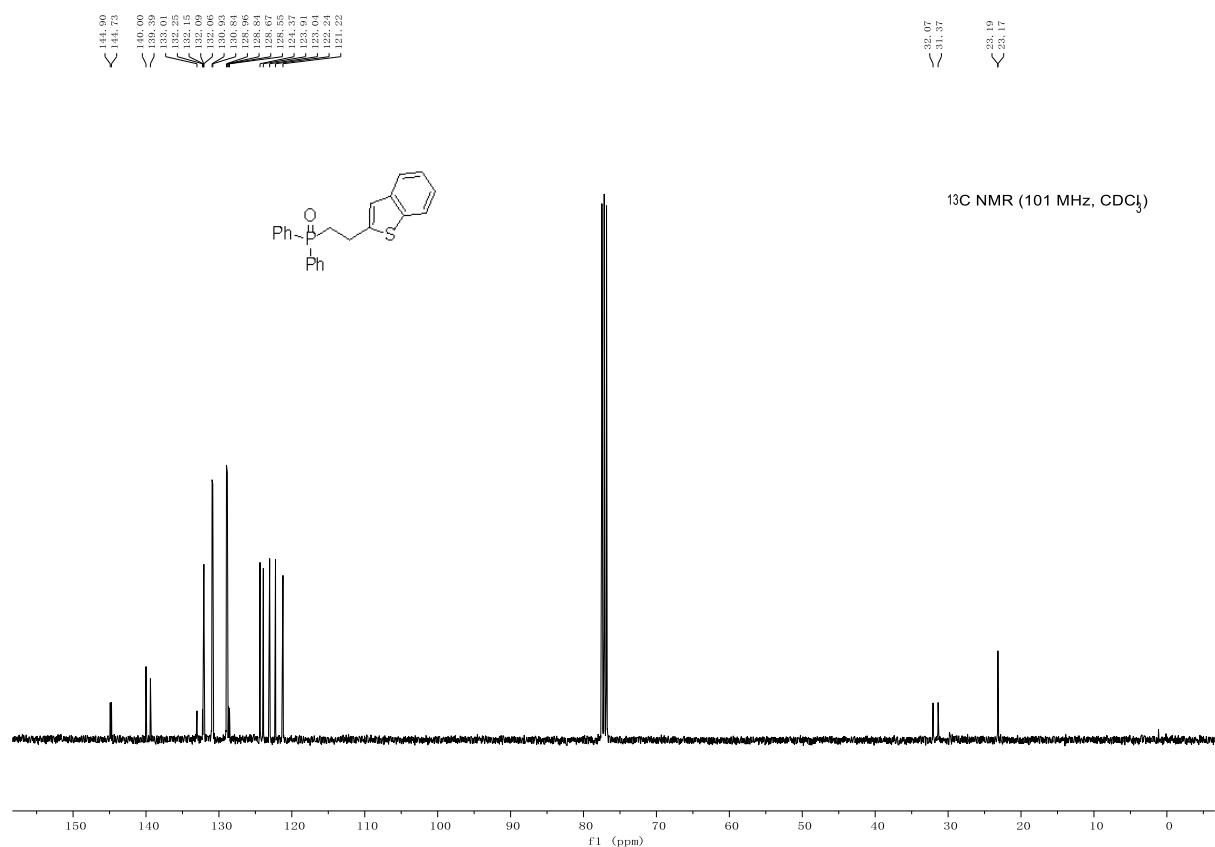

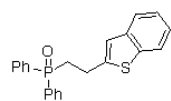

$^{31}\text{P}$  NMR (162 MHz,  $\text{CDCl}_3$ )

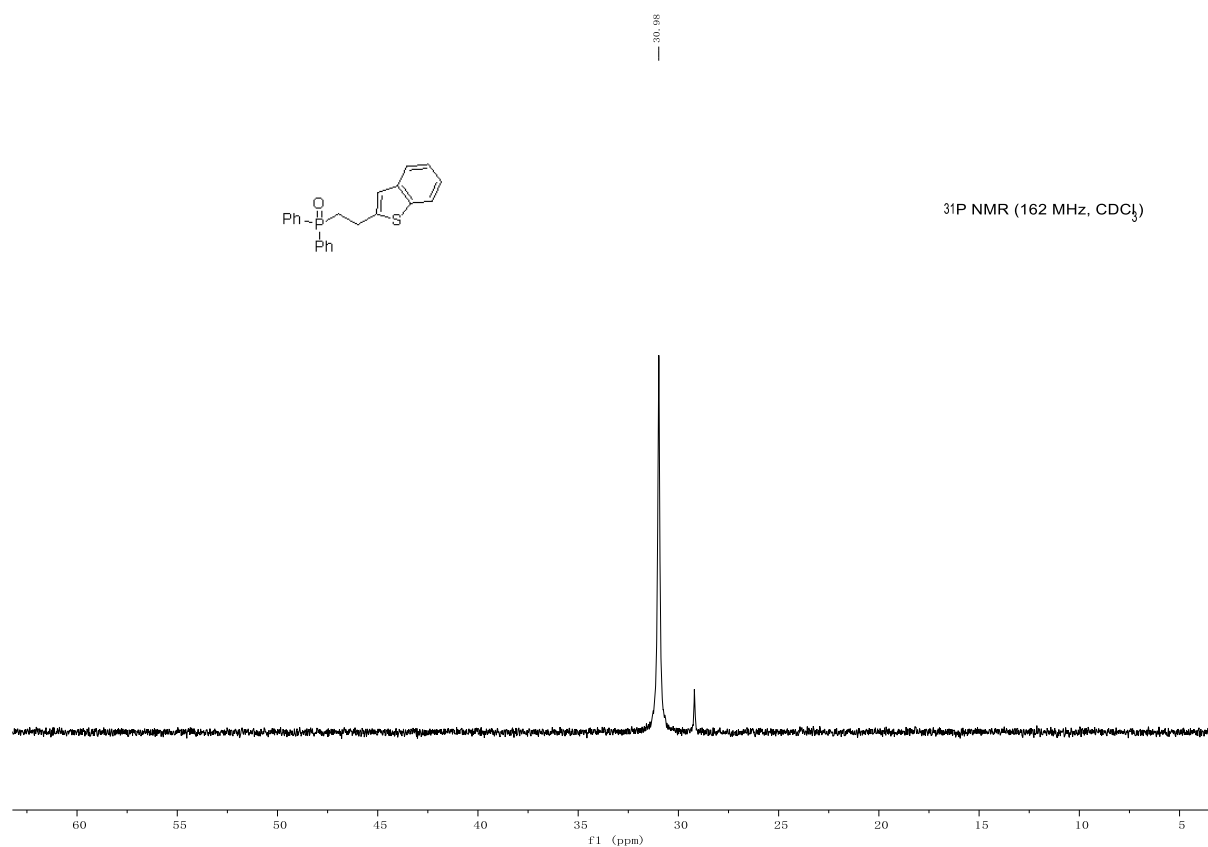

(18) Phenethyldi-*p*-tolylphosphine oxide (**3r**)

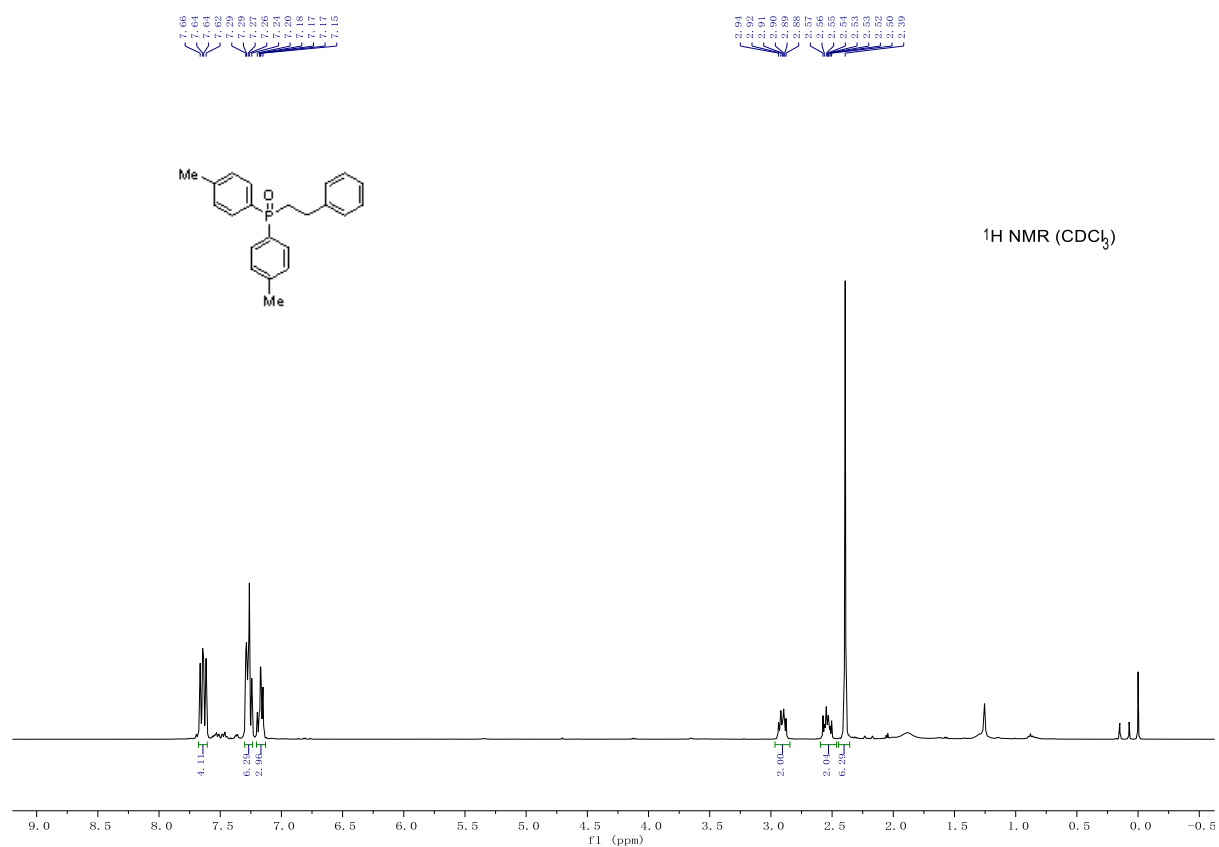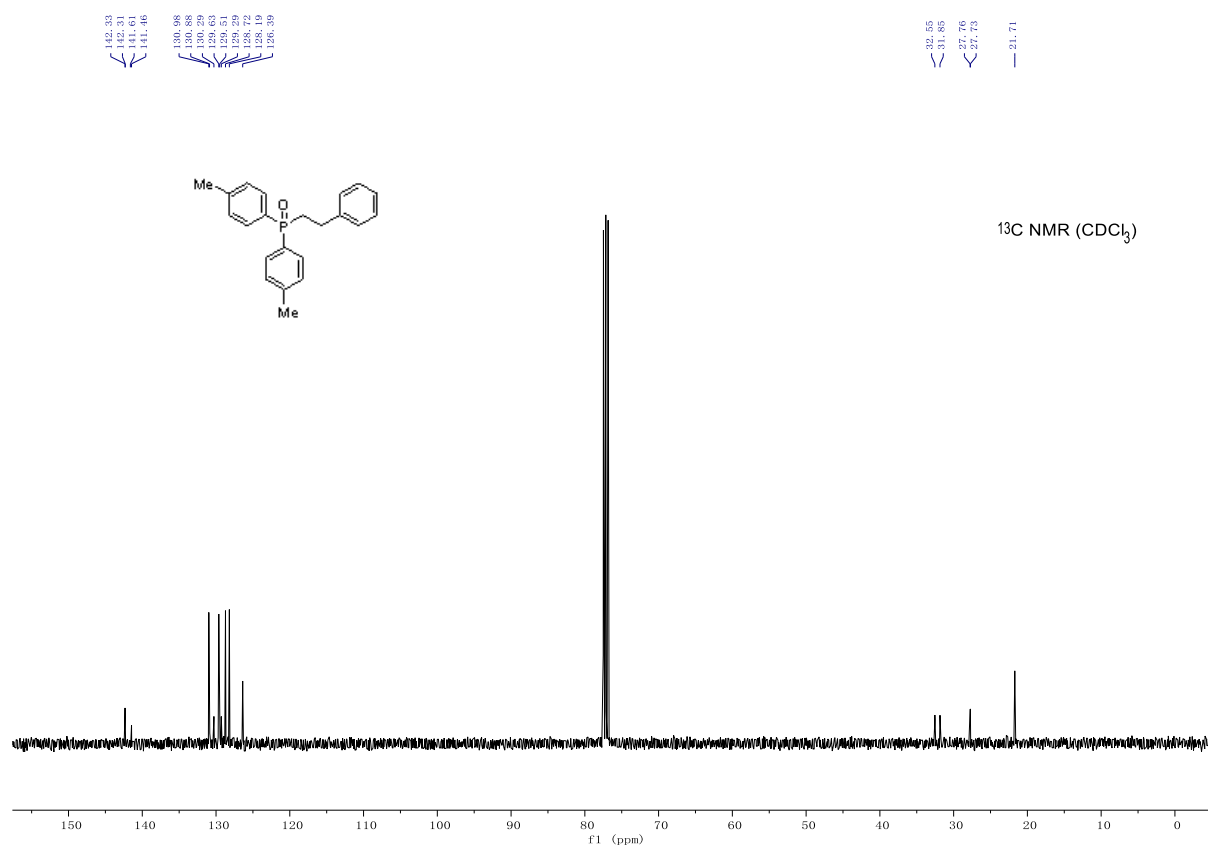

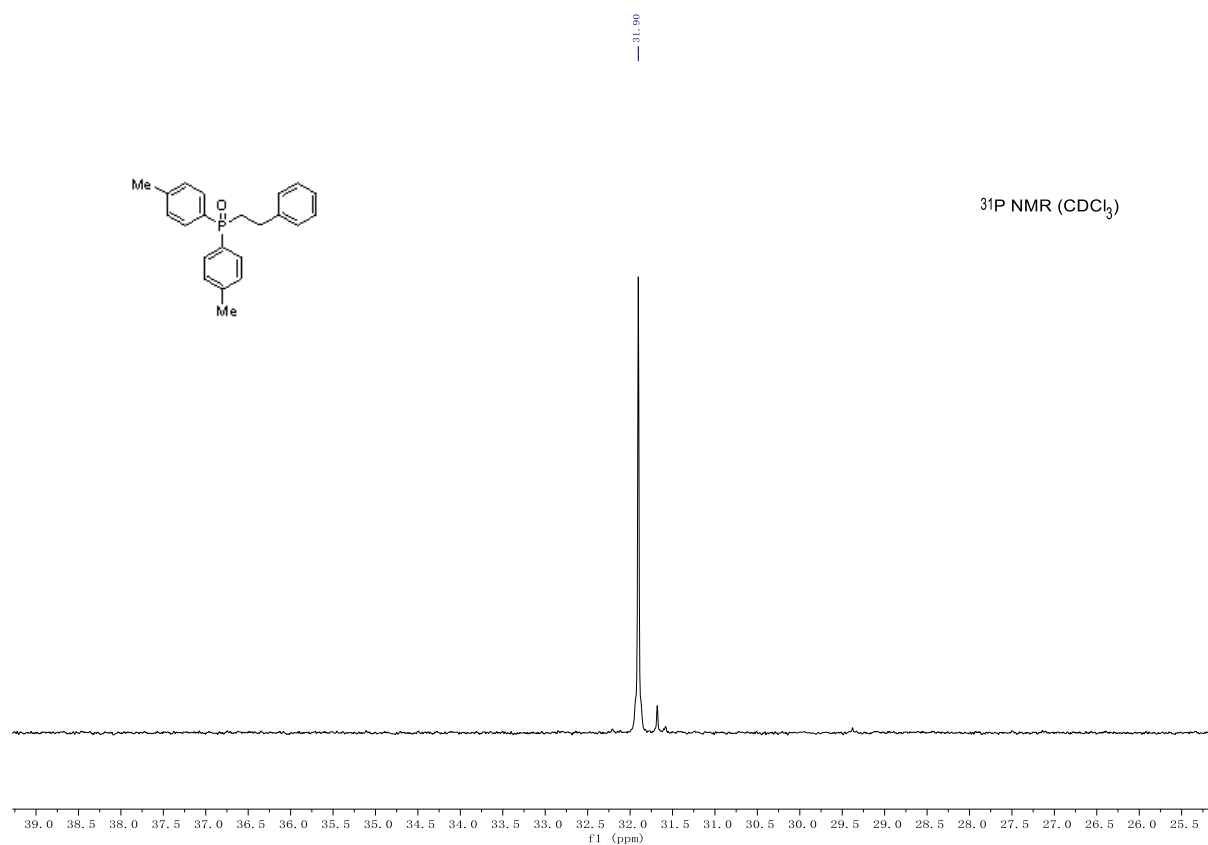

(19) Bis(4-(dimethylamino)phenyl)(phenethyl)phosphine oxide (**3s**)

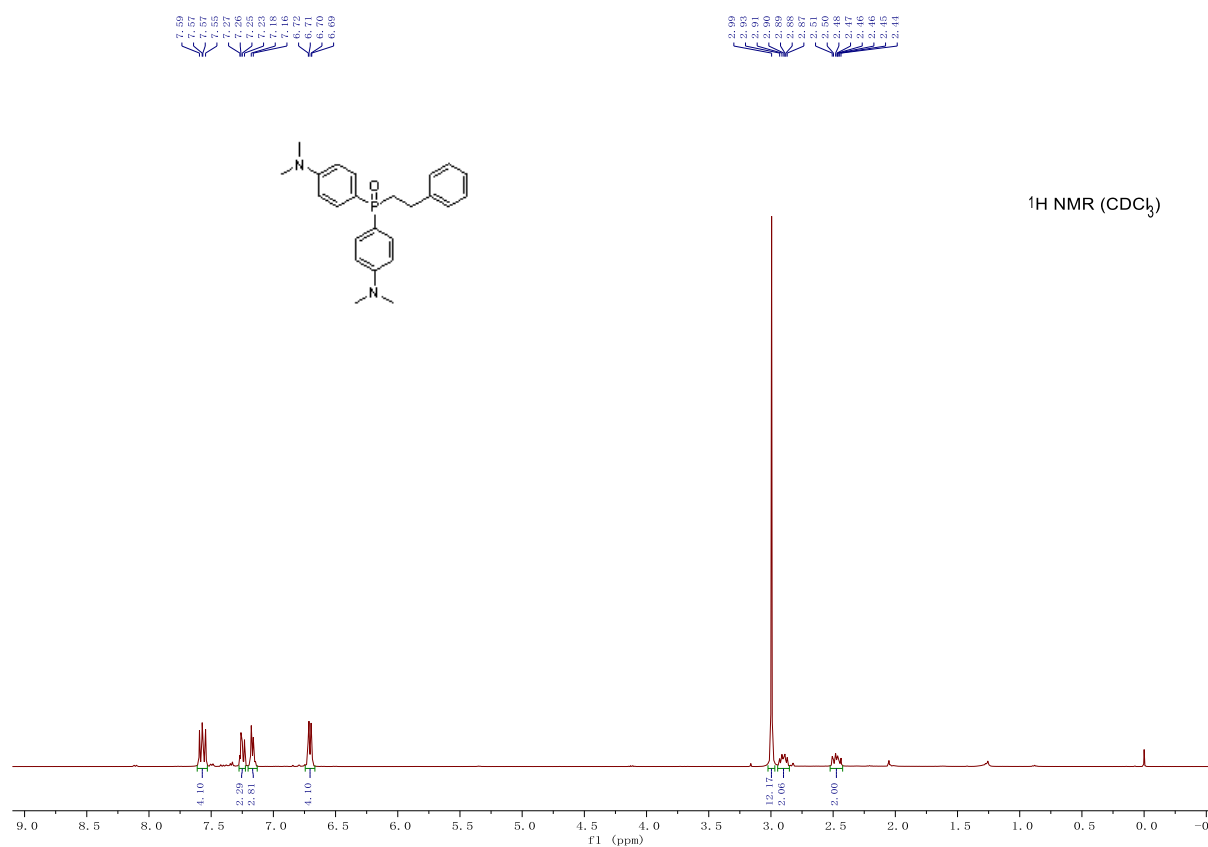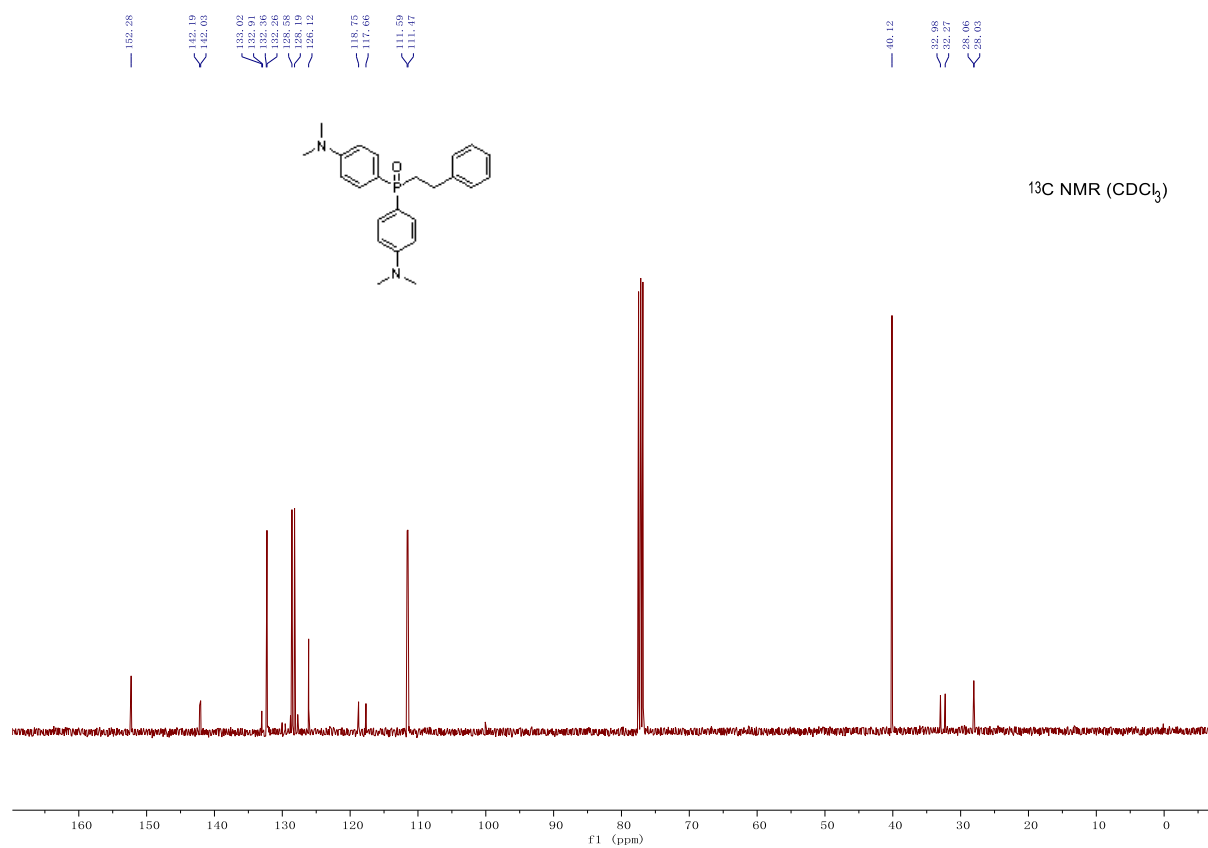

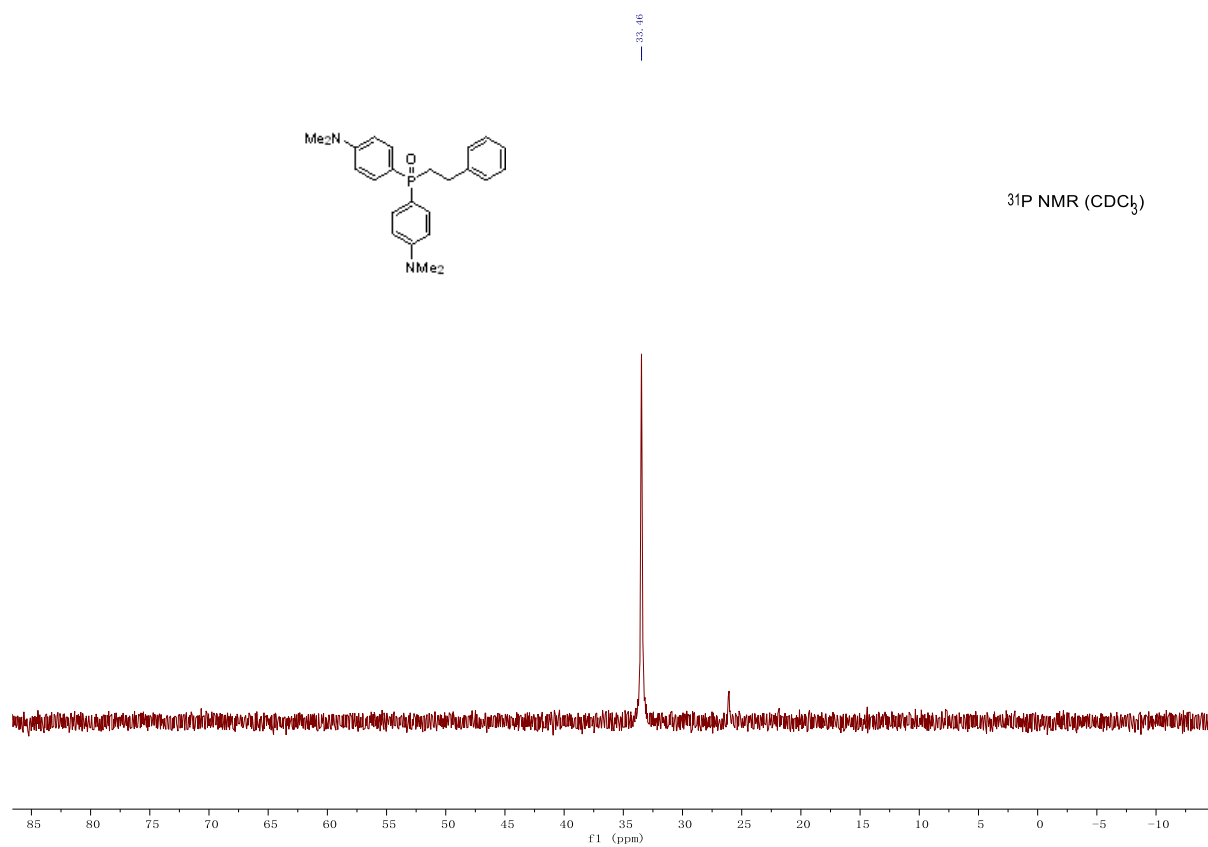

(20) Bis(3-methoxyphenyl)(phenethyl)phosphine oxide (**3t**)

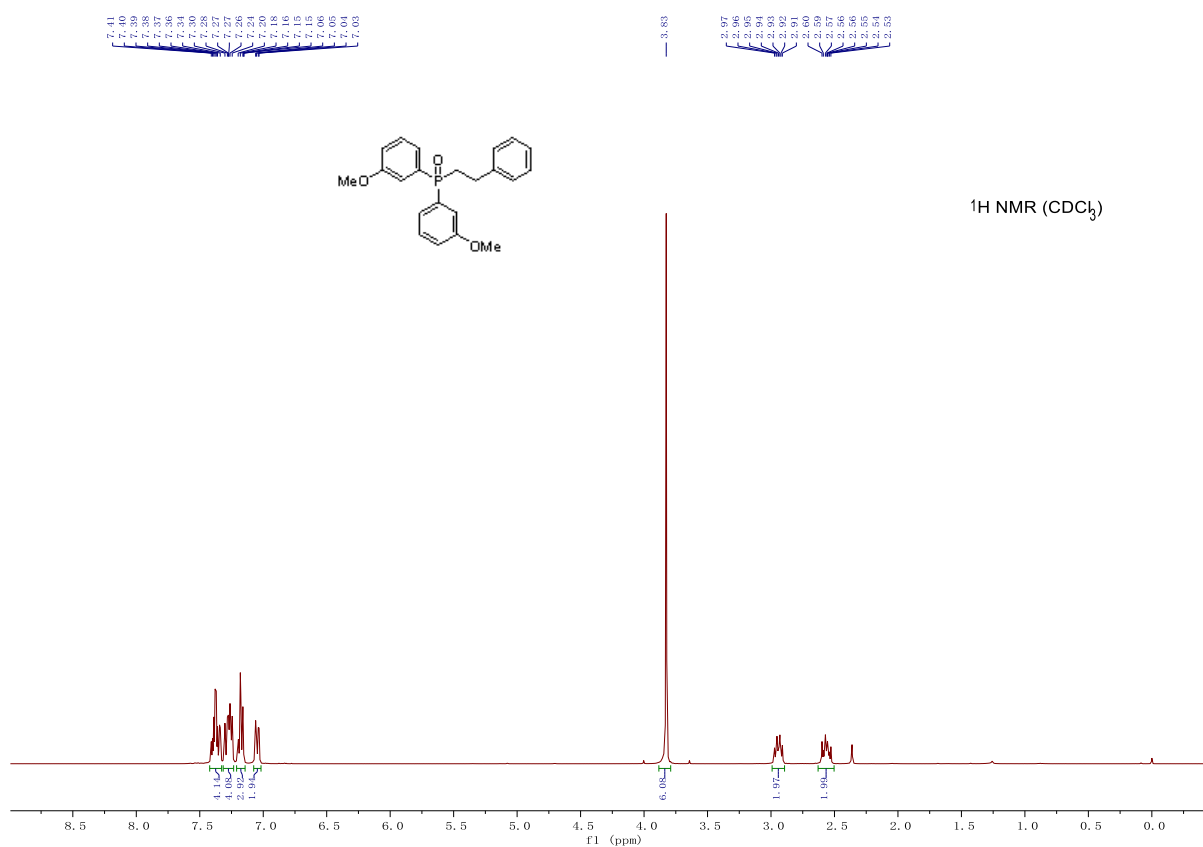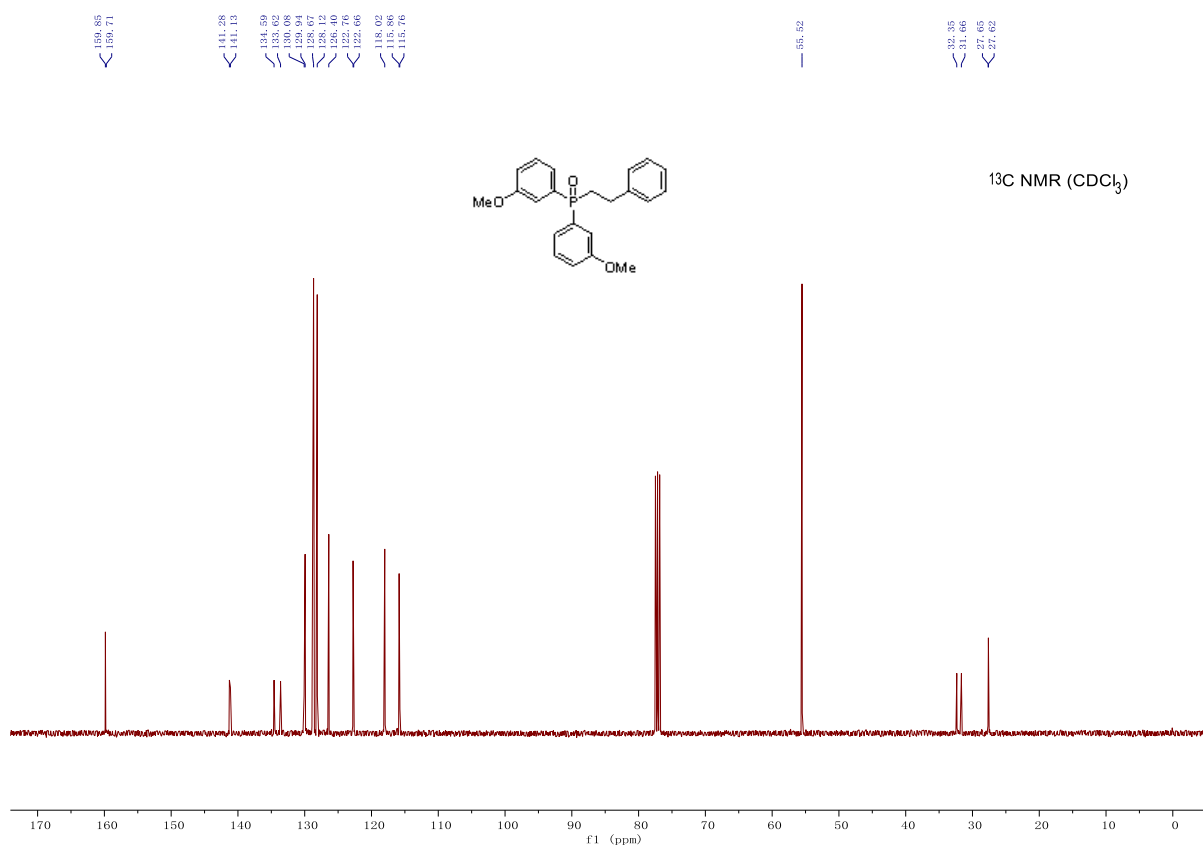



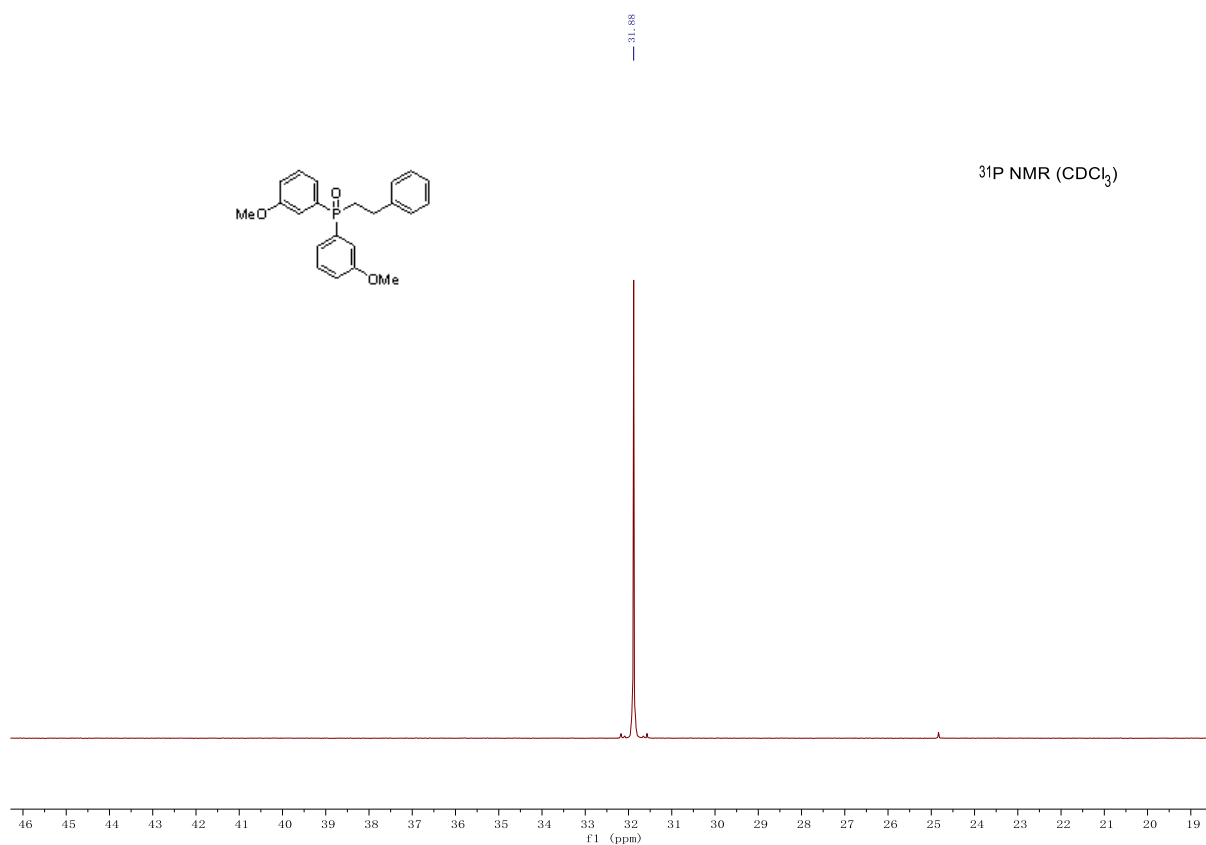

(21) Di(naphthalen-2-yl)(phenethyl)phosphine oxide (**3u**)

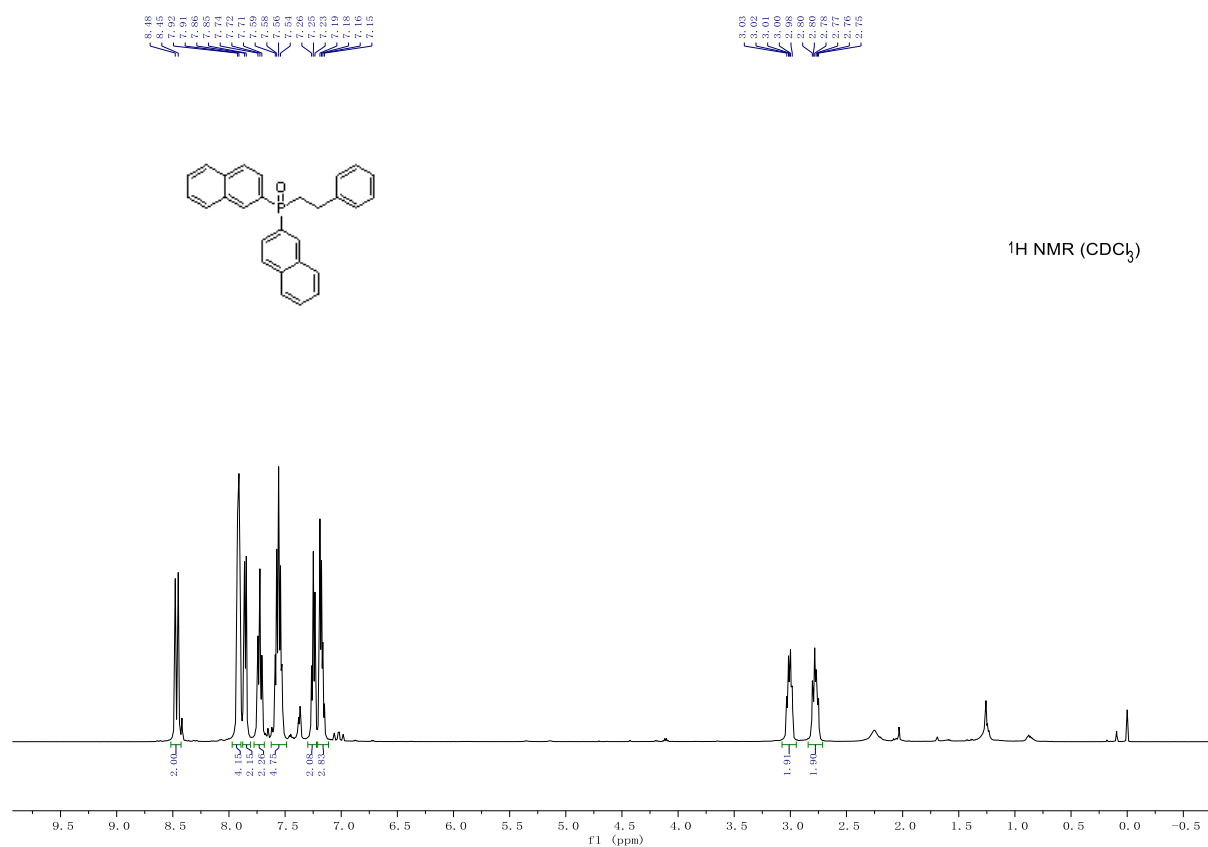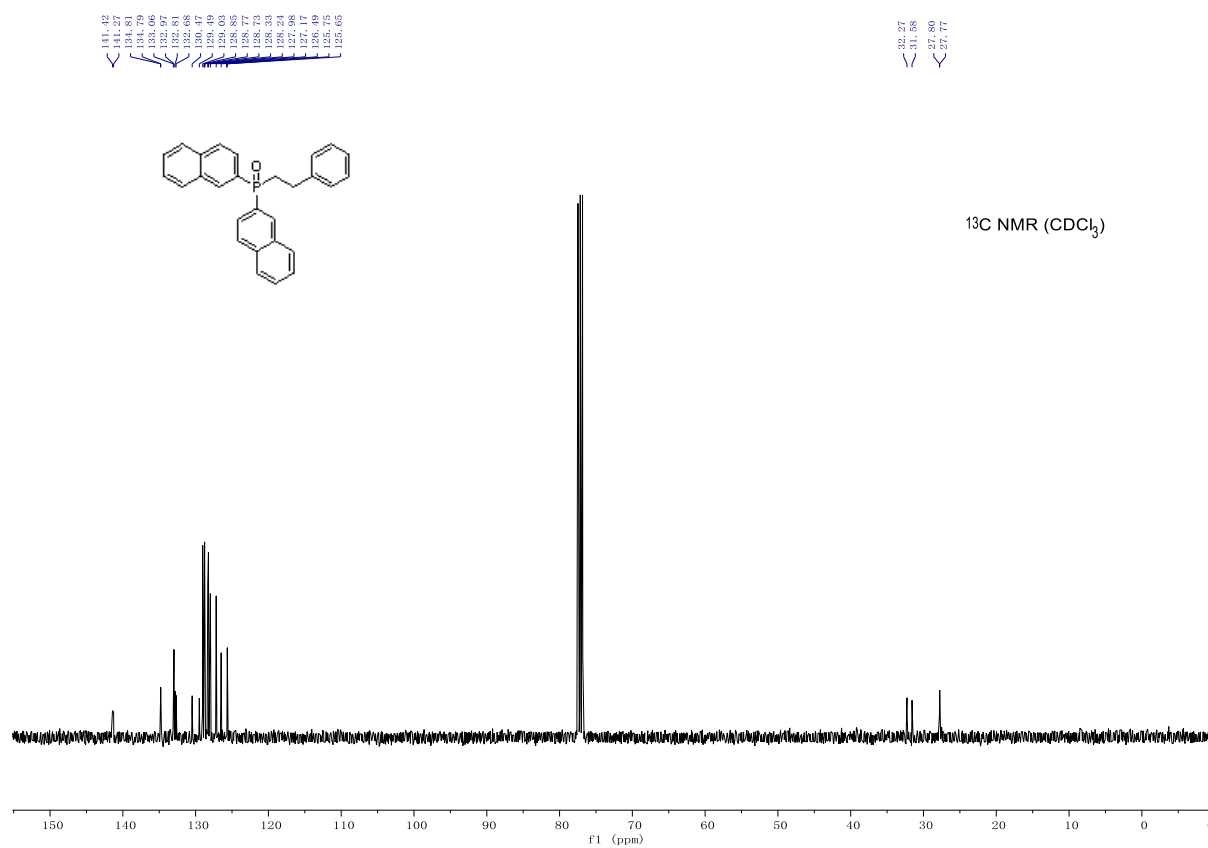

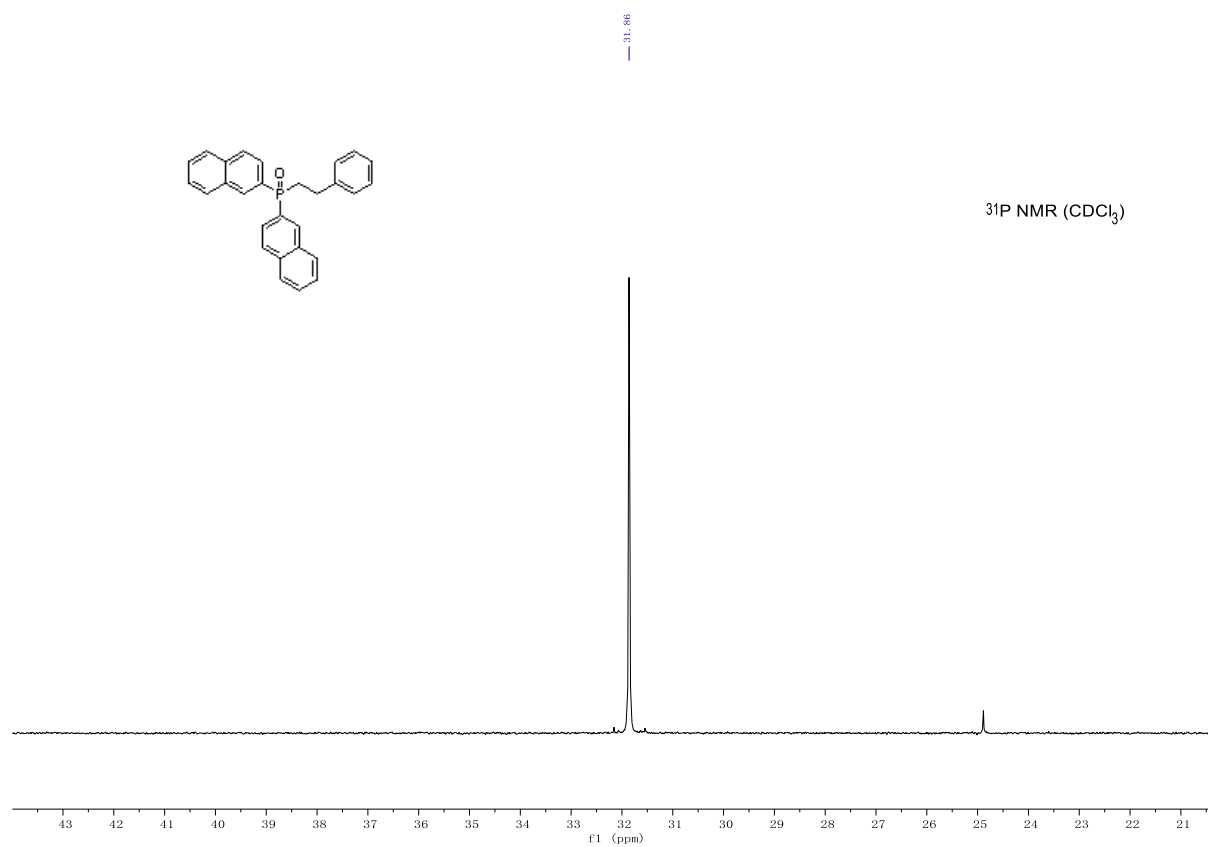

(22) Dimethyl phenethylphosphonate (**4a**)

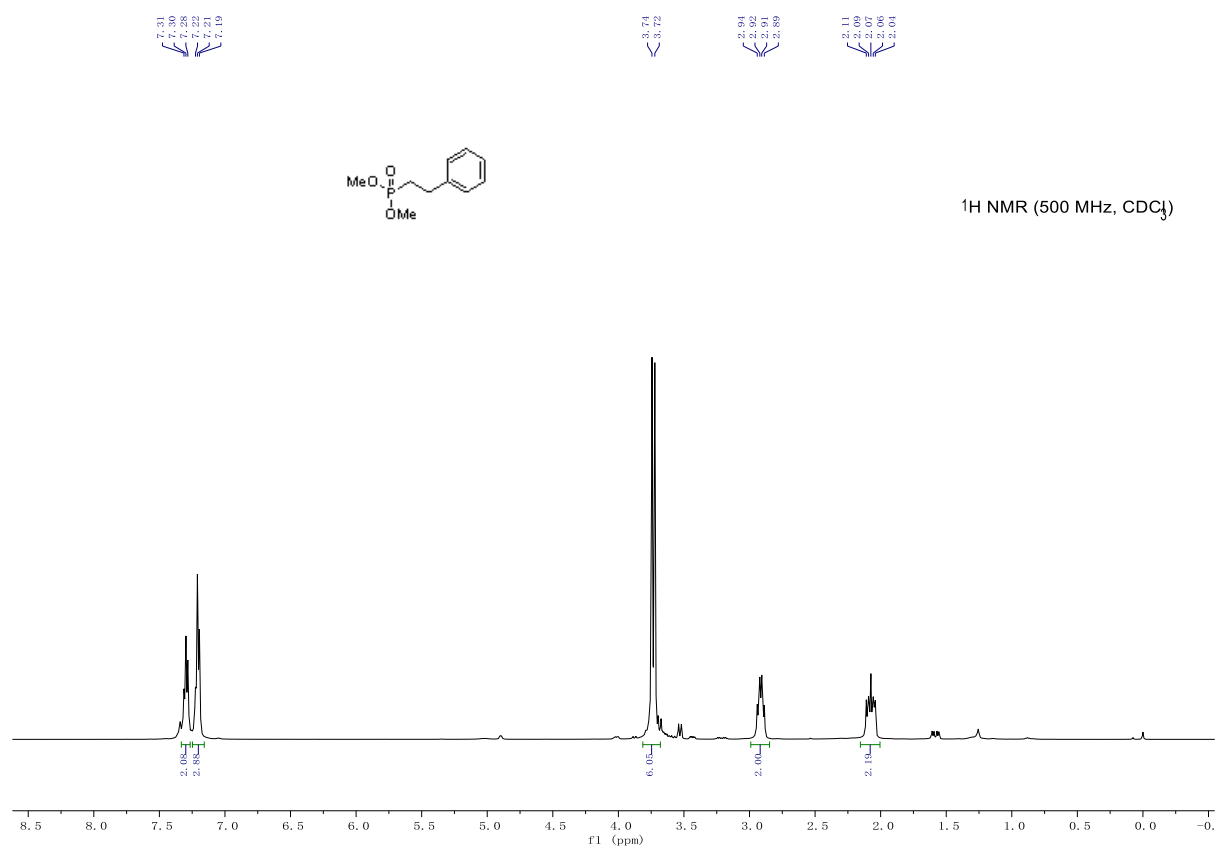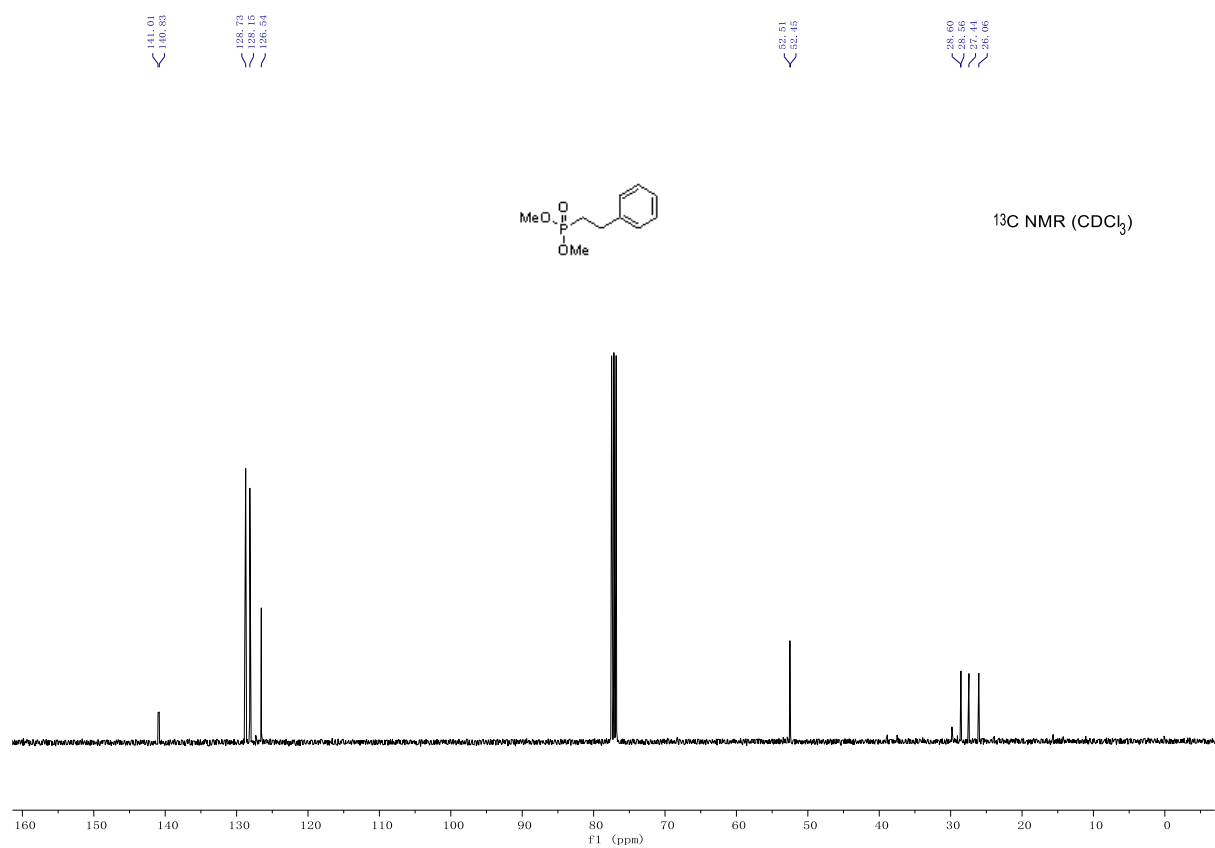

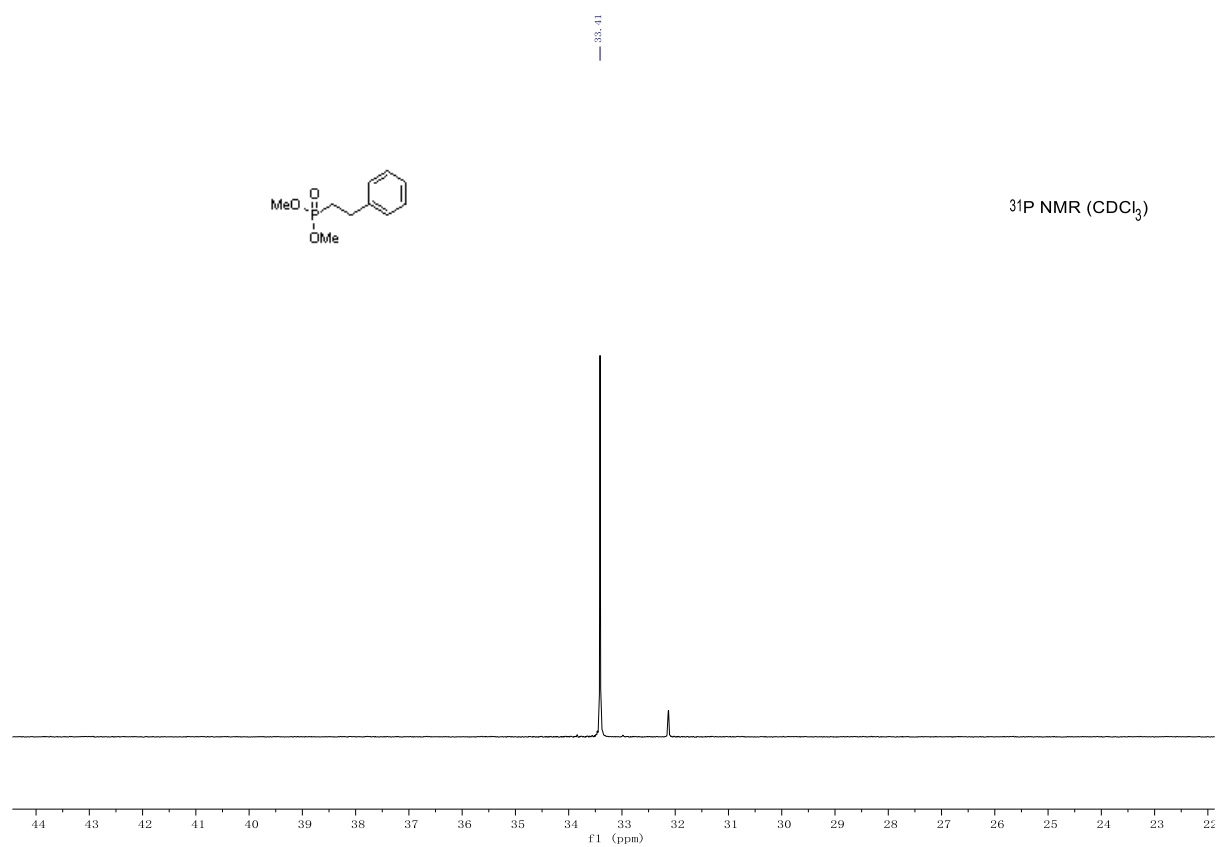

(23) Diethyl phenethylphosphonate (**4b**)

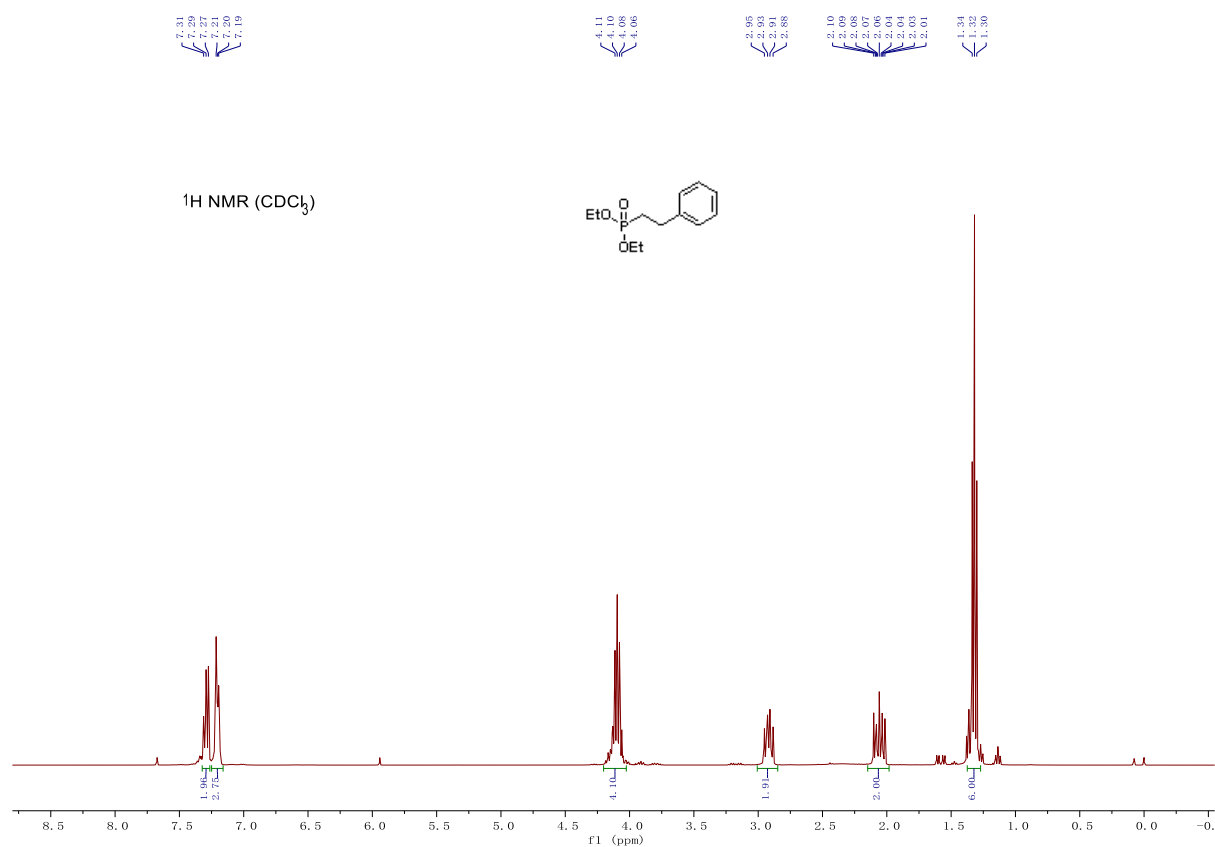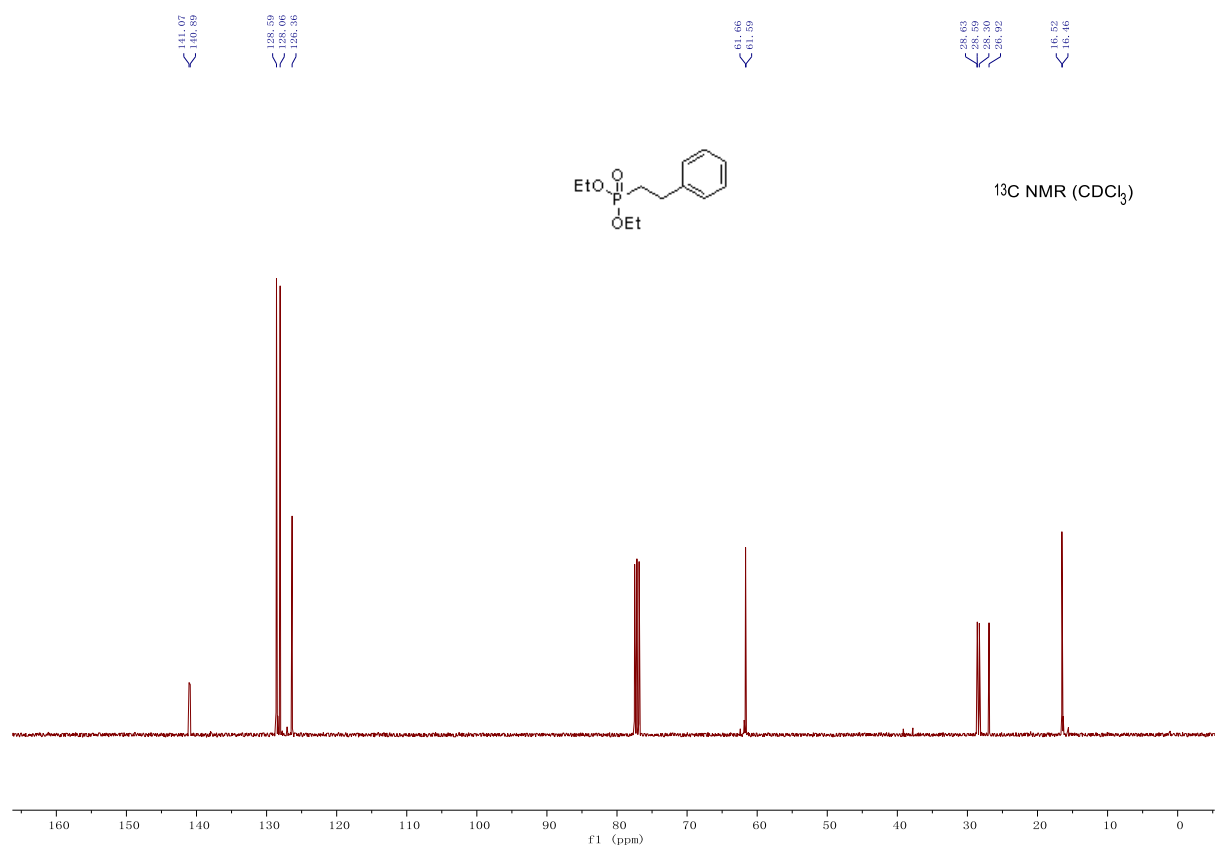

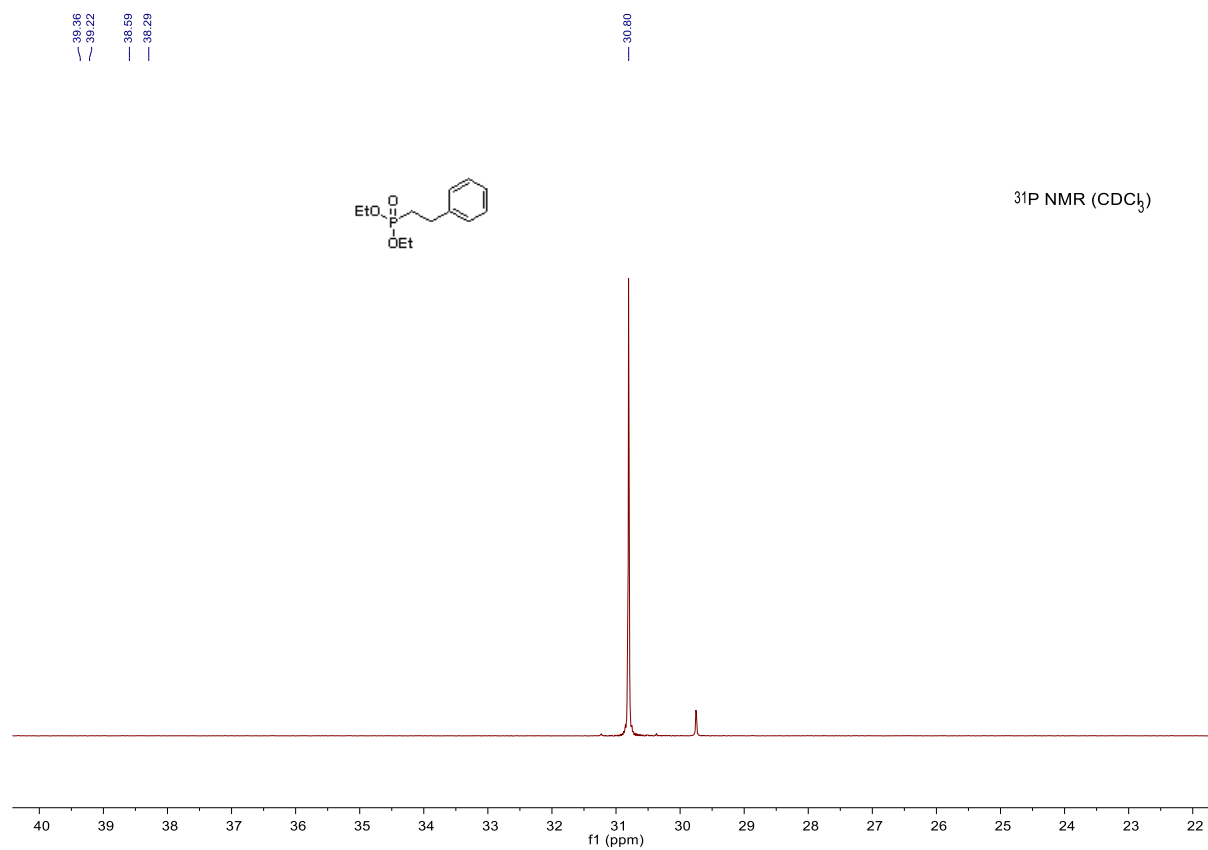

(24) Diethyl (4-methylphenethyl)phosphonate (**4c**)

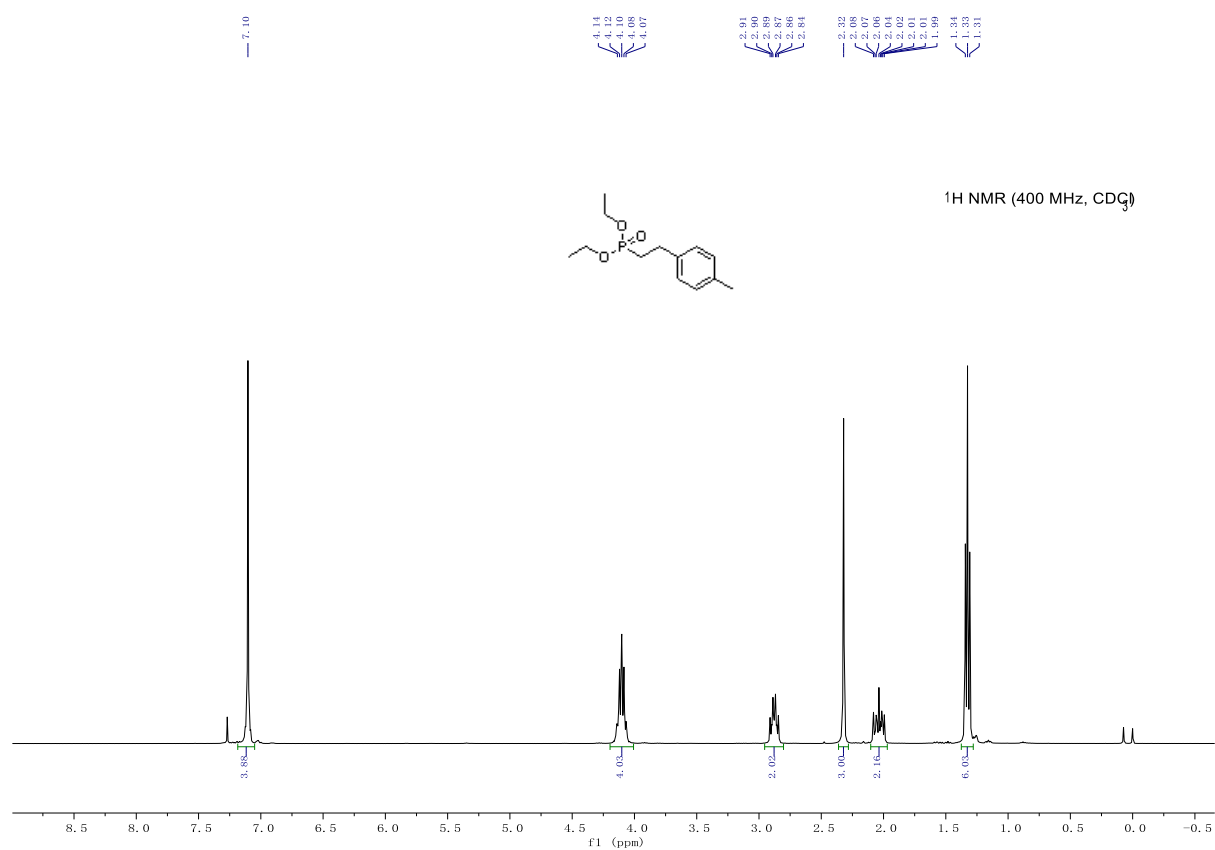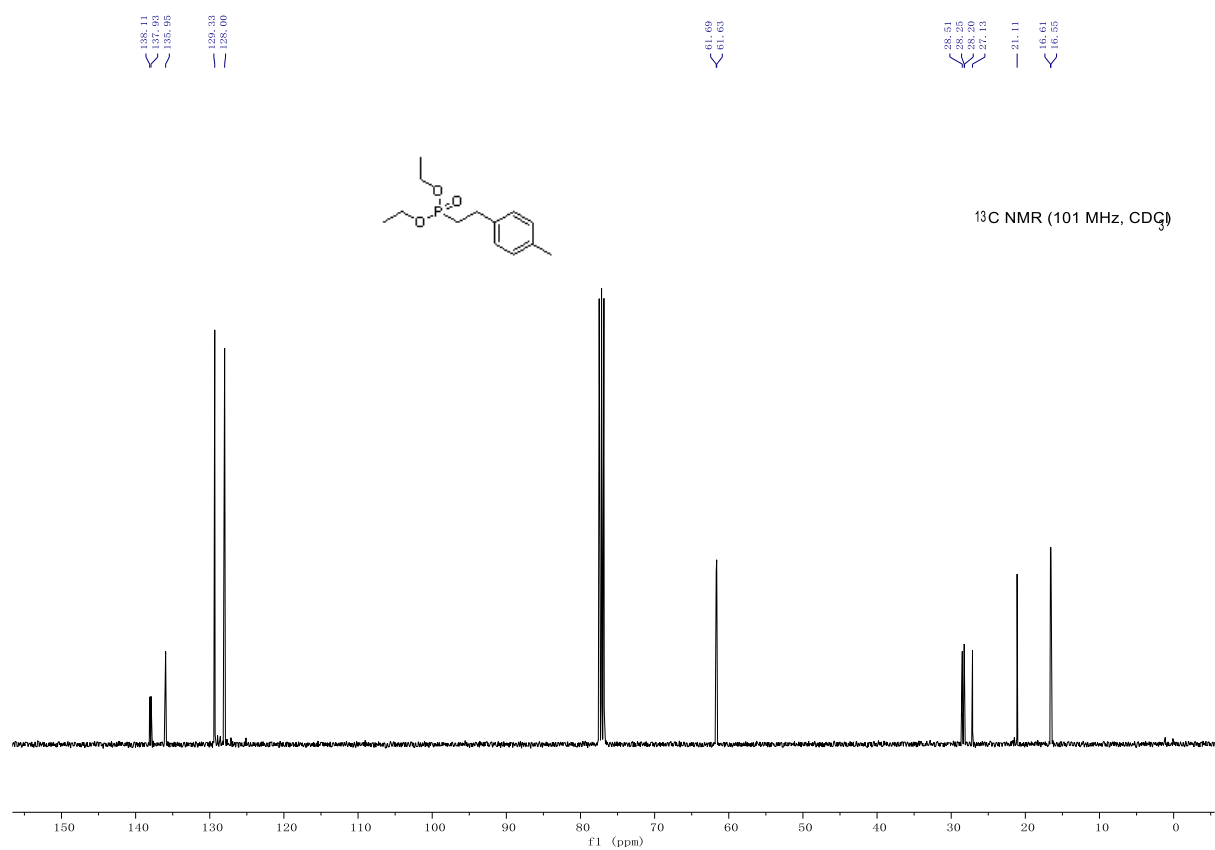



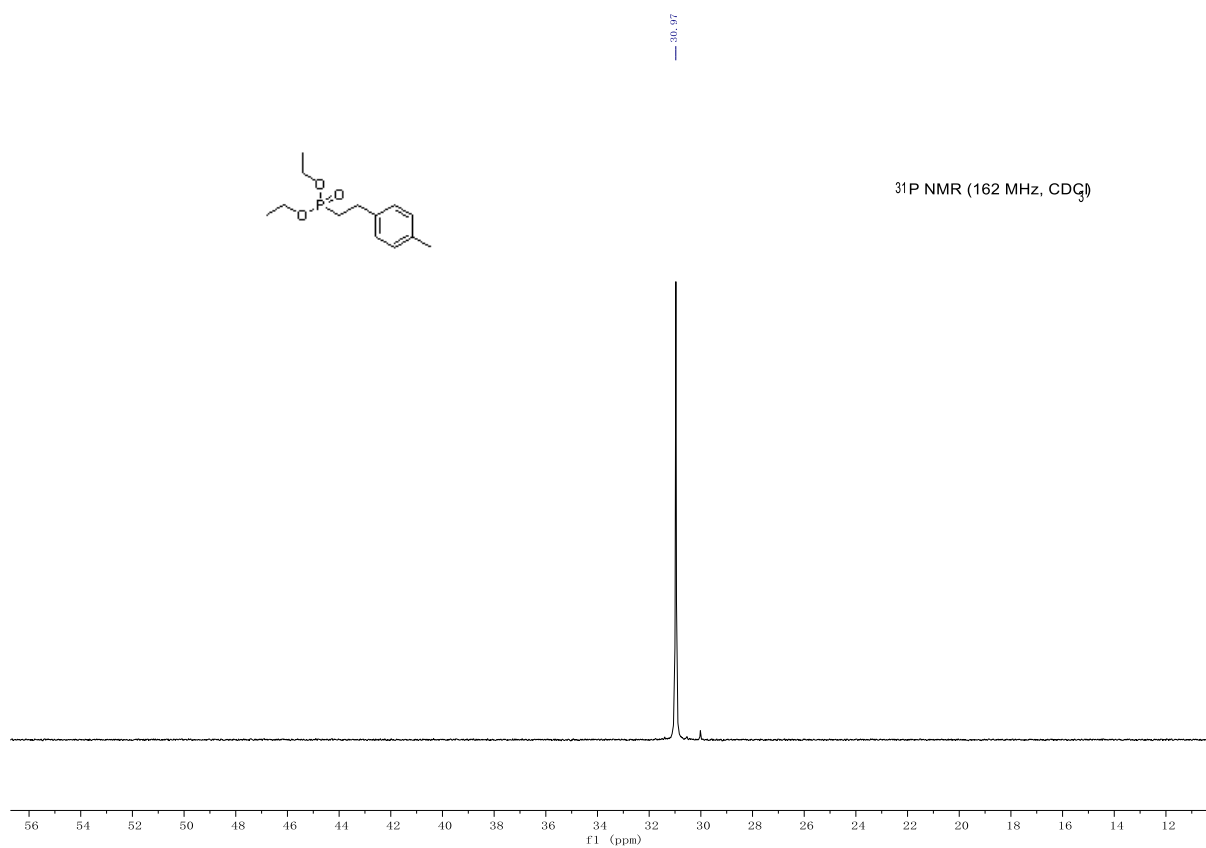

(25) Diethyl (4-methoxyphenethyl)phosphonate (**4d**)

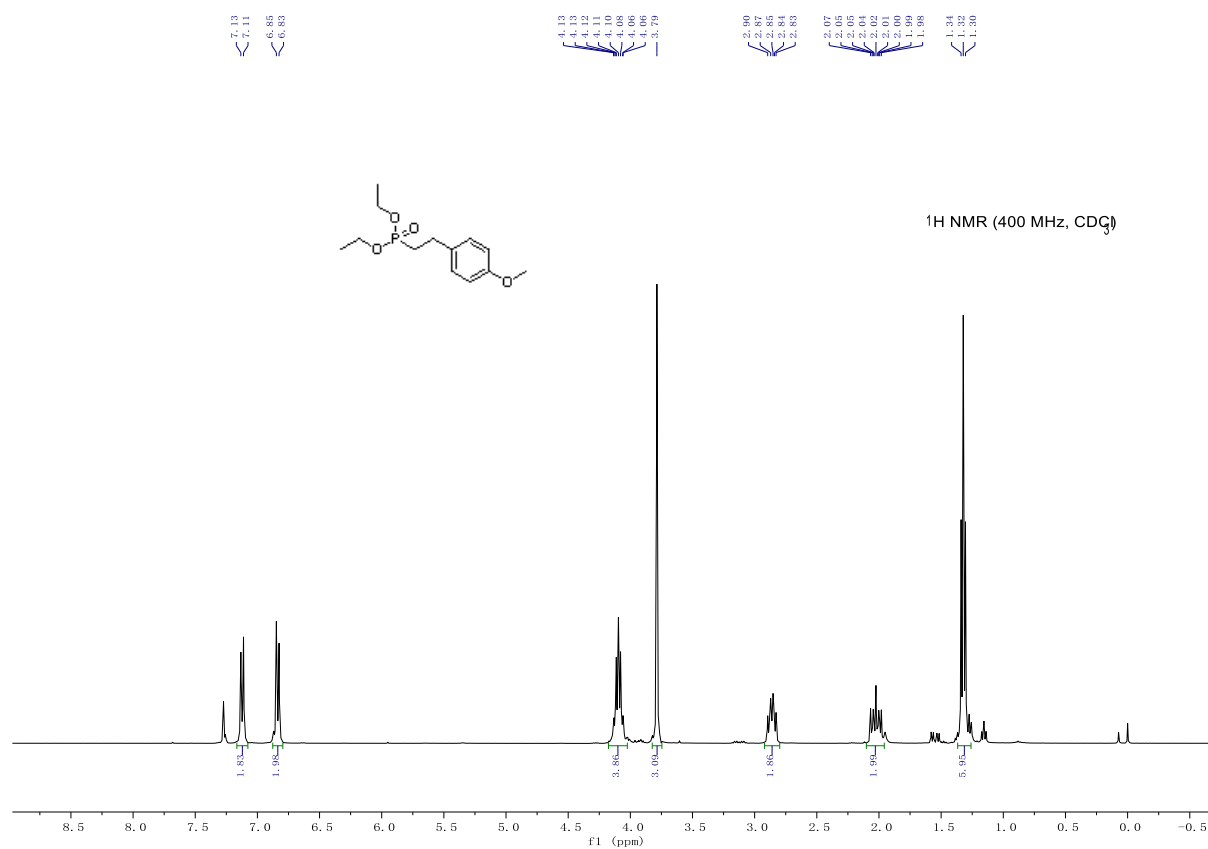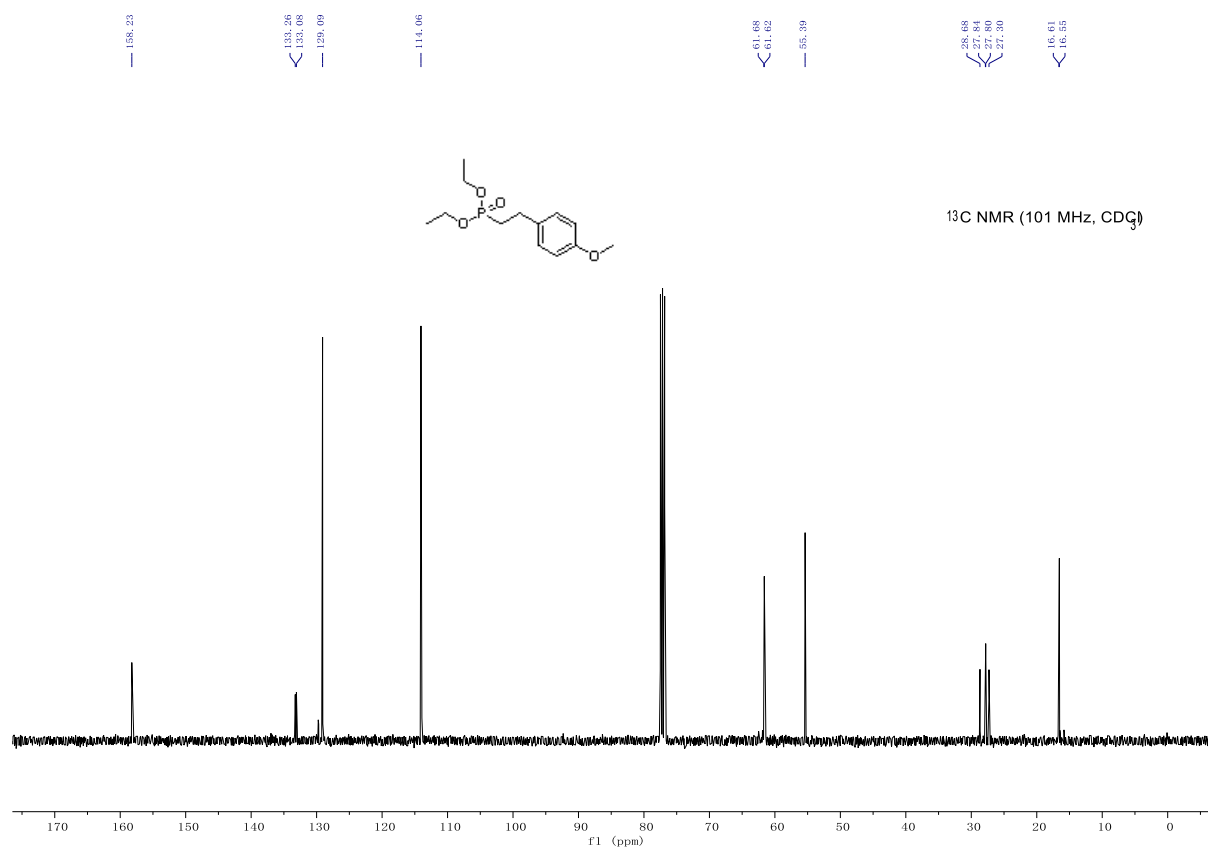

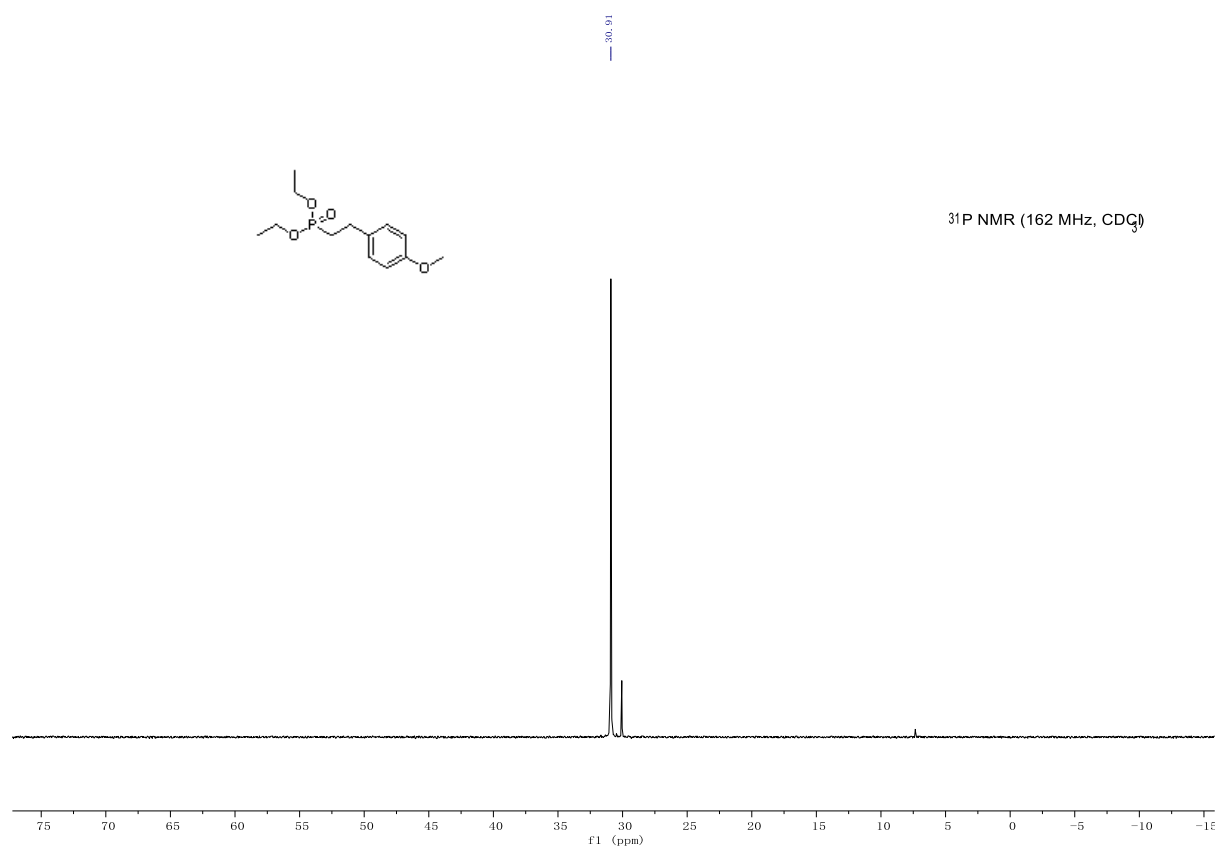

(26) Diethyl (4-fluorophenethyl)phosphonate (**4e**)

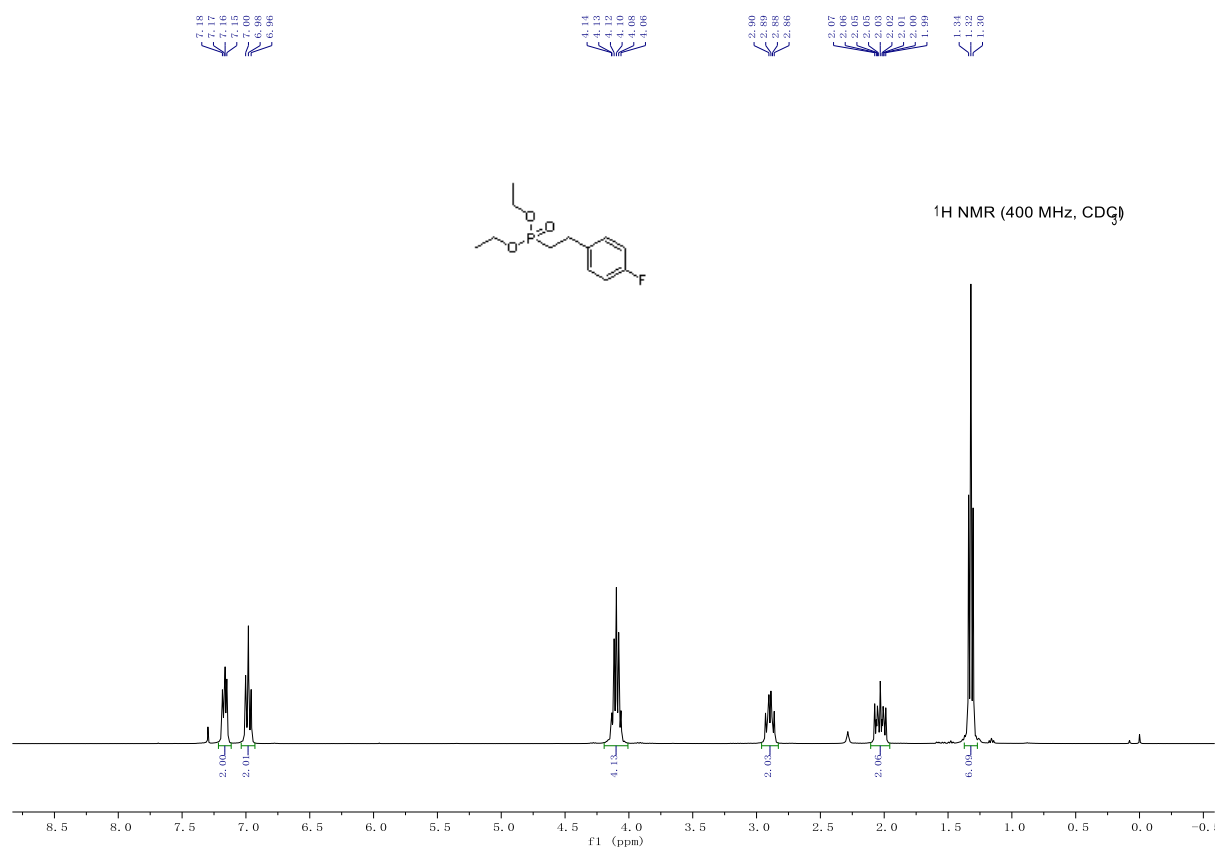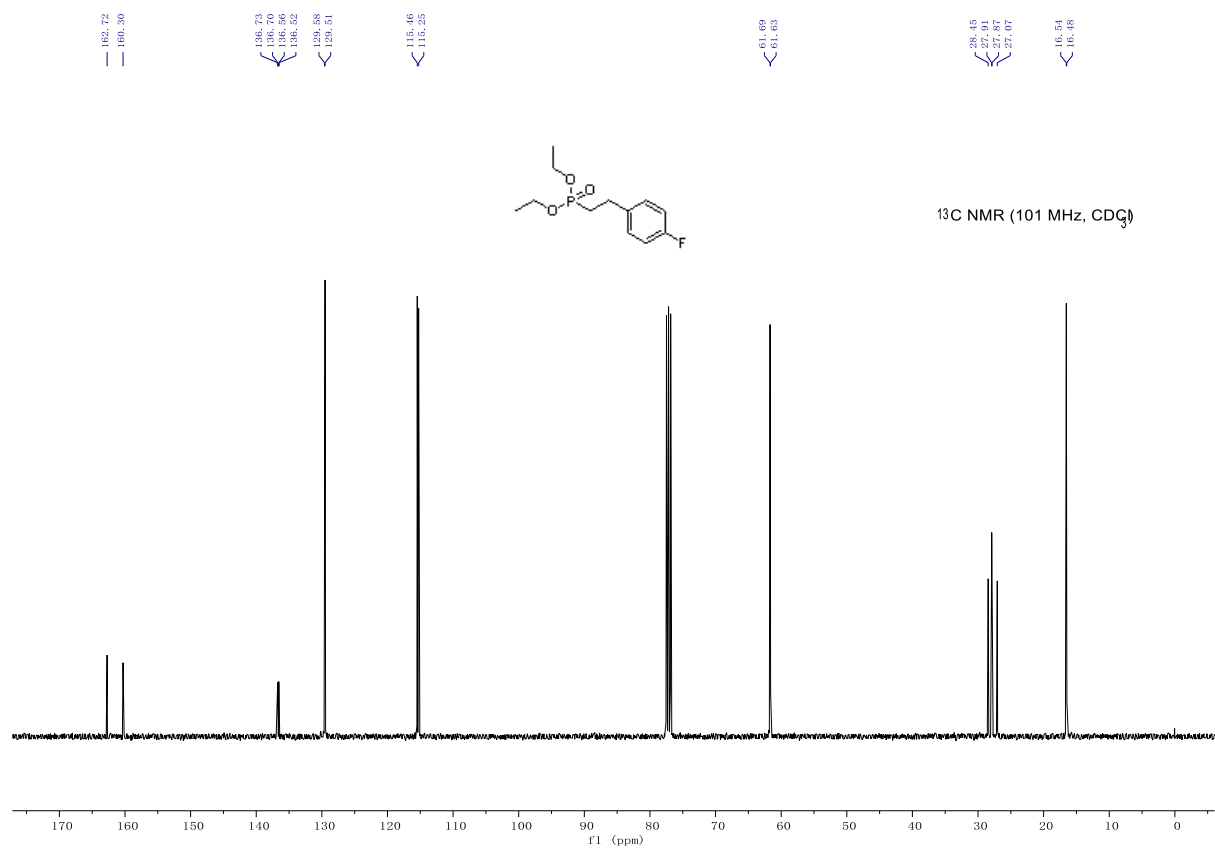

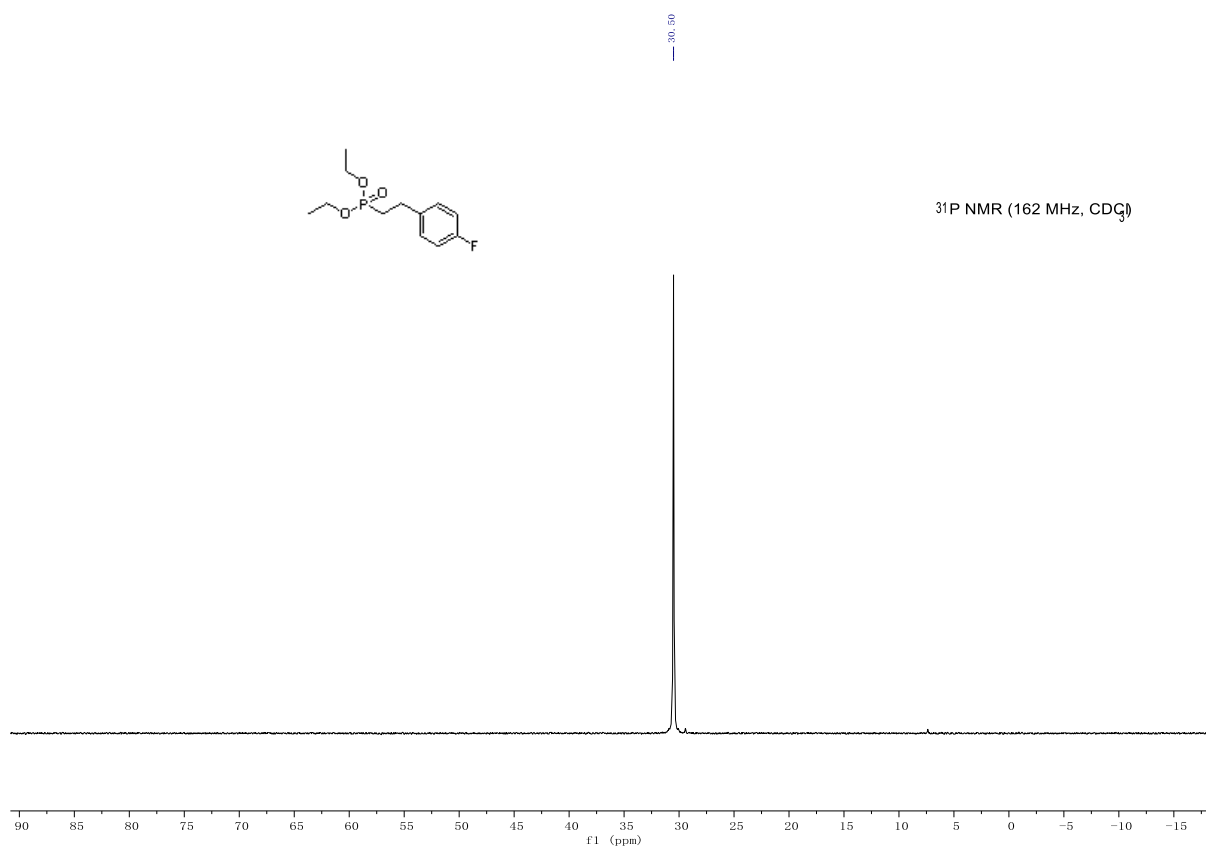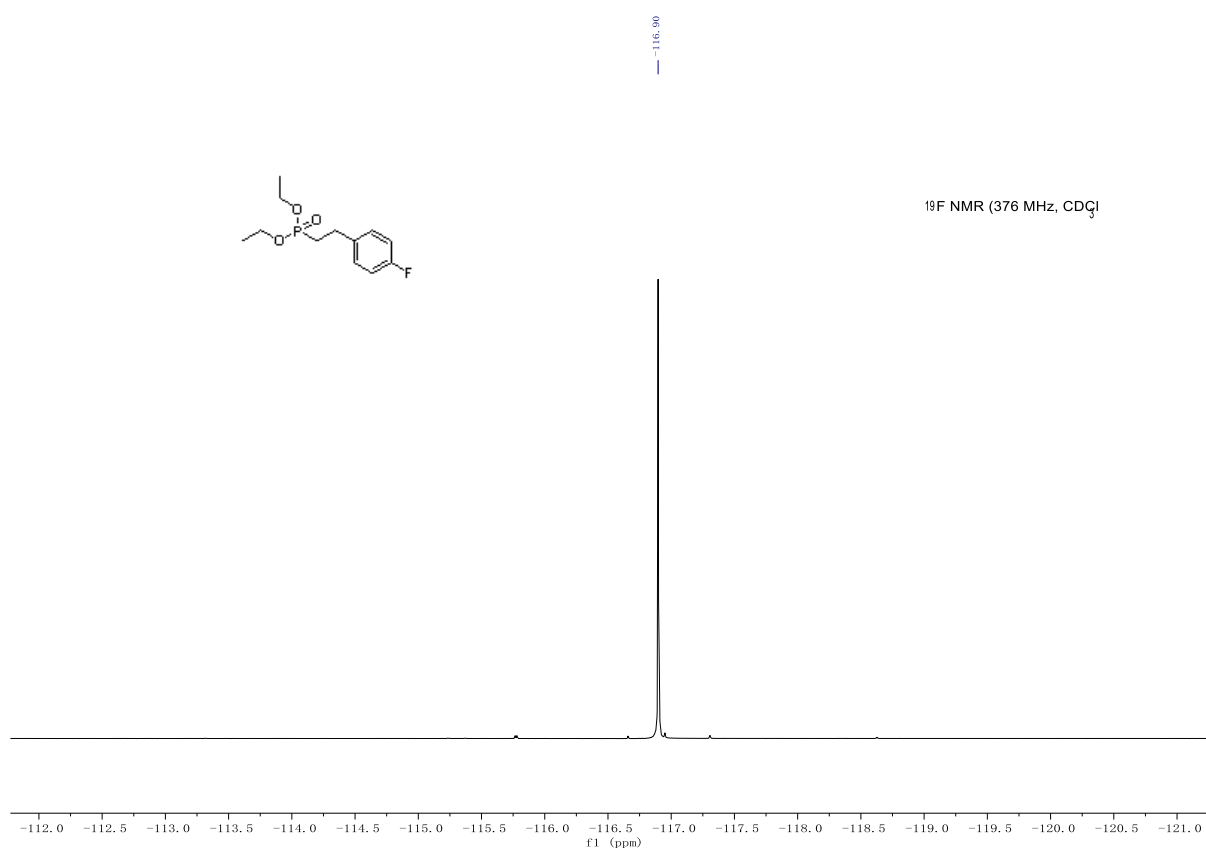

### 3. NMR spectrum of reduction product of Ph<sub>2</sub>P(O)CH<sub>2</sub>CH<sub>2</sub>Ph (3a) with HSiCl<sub>3</sub>

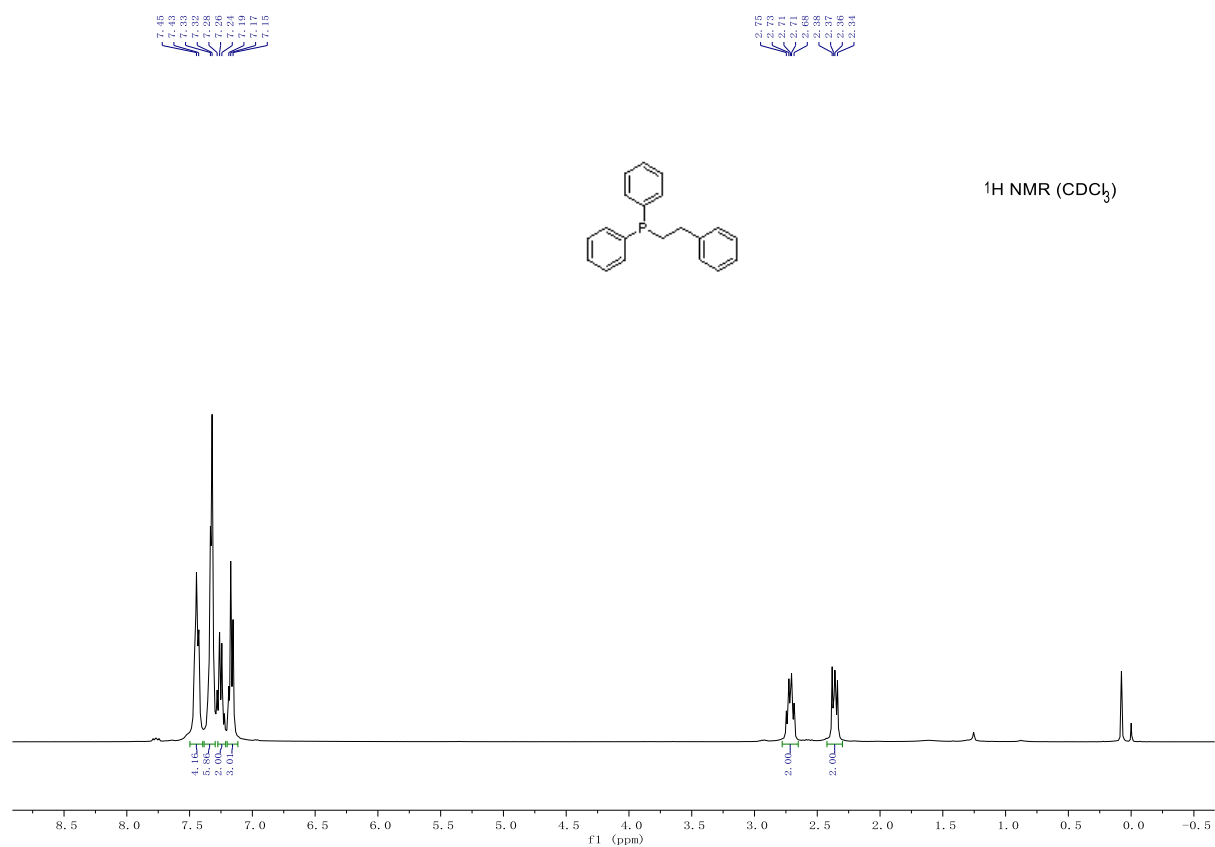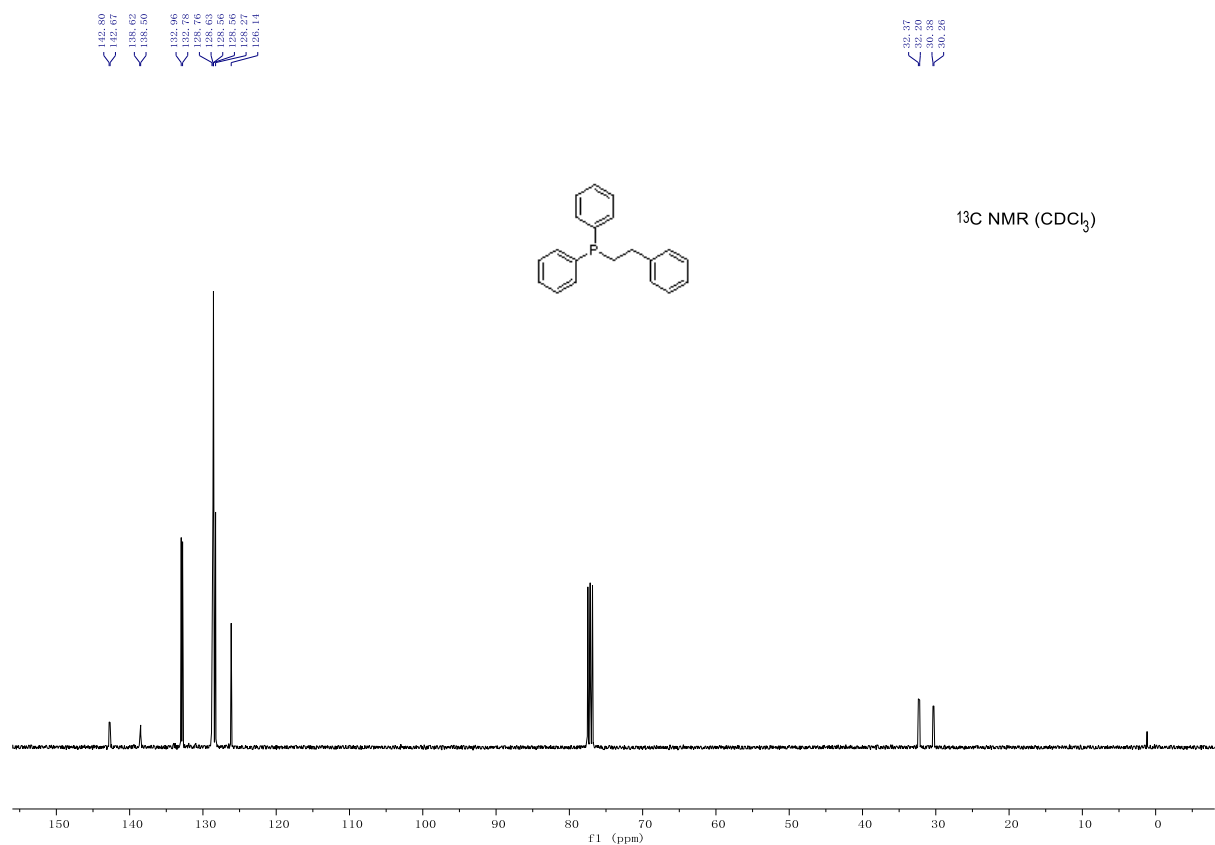

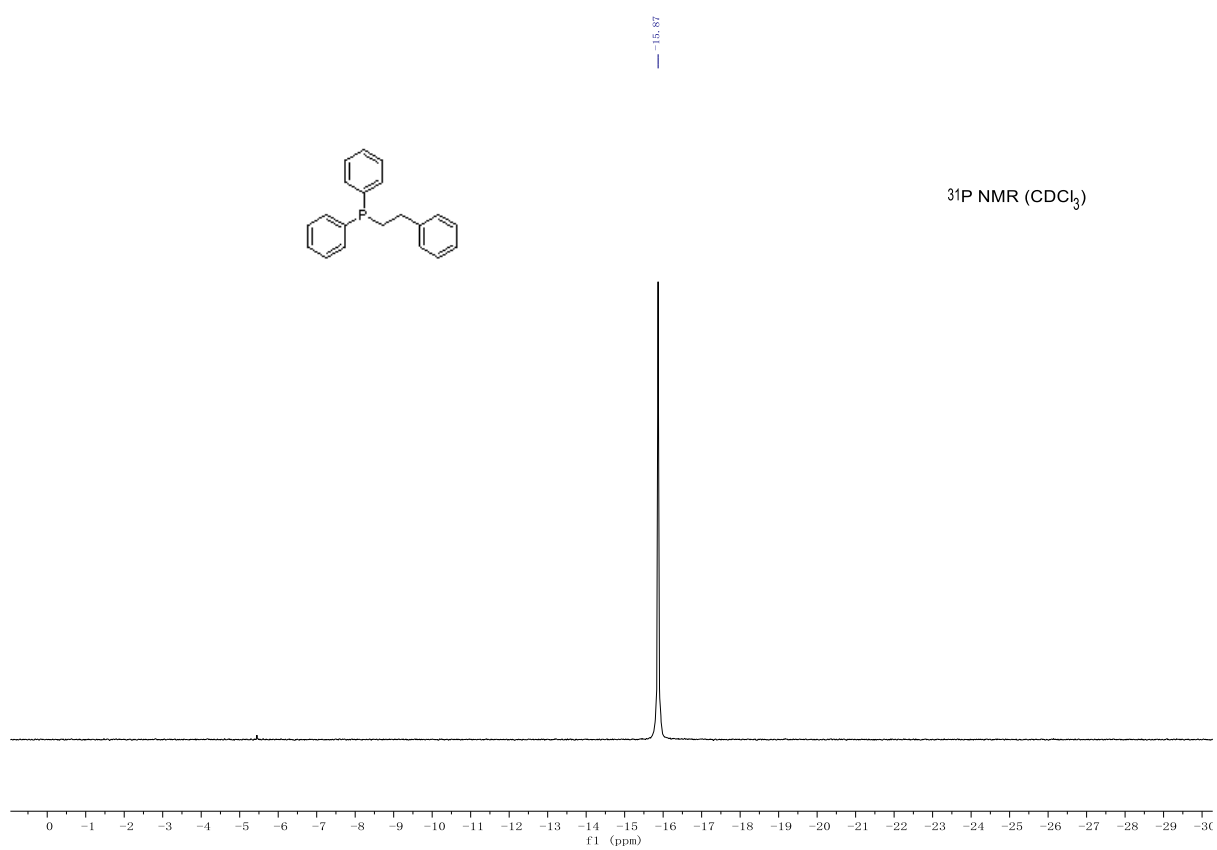

#### 4. $^1\text{H}$ NMR spectrum of reaction product of $\text{Ph}_2\text{P}(\text{O})\text{Me}$ with $\text{PhCD}_2\text{OH}$

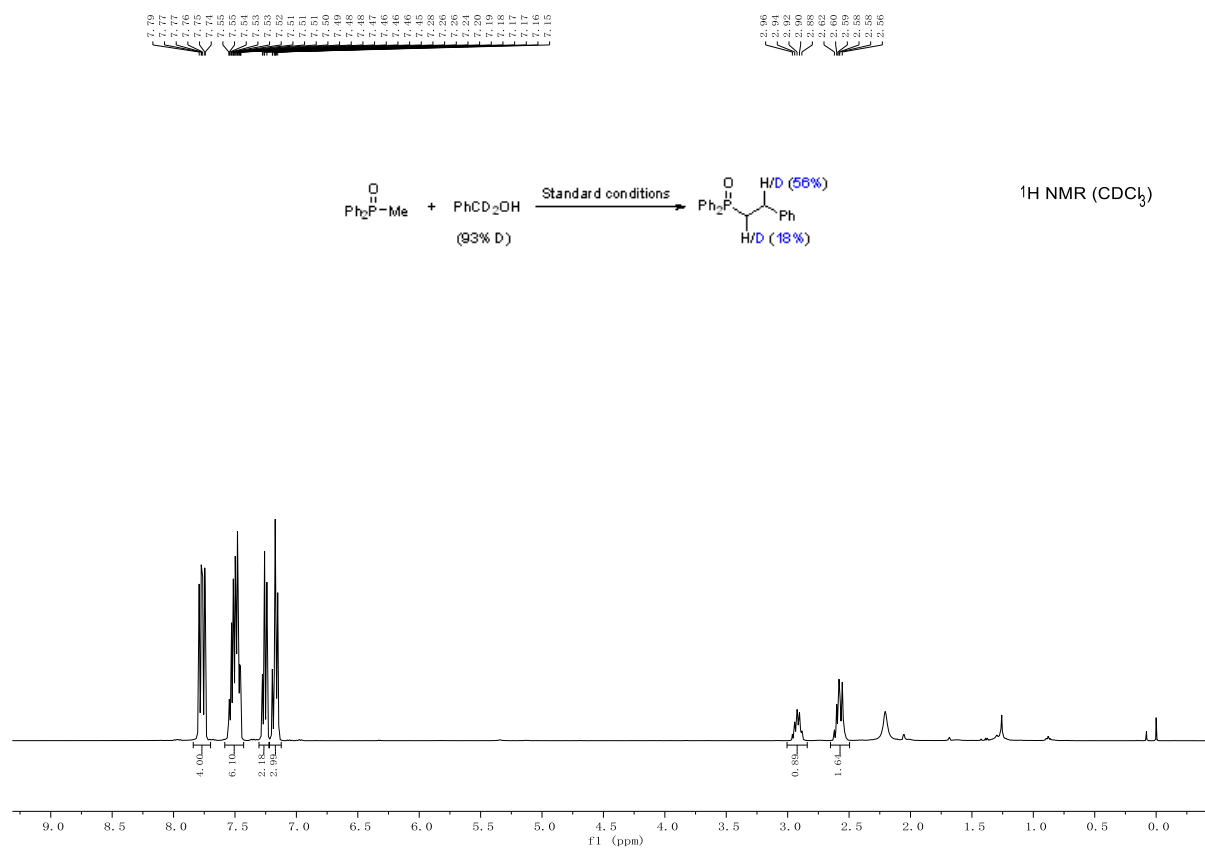

Supplement: d1ob00086a1.pdf [file d1ob00086a1.pdf]
